# Supplementary material for: Global imprint of climate change on marine life
Source: Springer Nature journal article supplement (doi:10.1038/nclimate1958), 2013-08-02
Supplement: 41558_2013_BFnclimate1958_MOESM357_ESM.pdf [file 41558_2013_BFnclimate1958_MOESM357_ESM.pdf]

# Global imprint of climate change on marine life

What is an observation?

Data extraction

Removing duplication

Changes in distribution and phenology

Comparison with quantitative shifts in climate

Consistency analysis

Biases

Attribution

## Supplementary Figures

Figure S1: Time span of observation

Figure S2:

Figure S3: Distribution shifts

Figure S4: Phenology shifts

Figure S5: Variability bias

Figure S6: Alternate drivers

## Supplementary Tables

Table S1 Full Database

Table S2 Observation classes and expected responses

Table S3 Taxonomic groupings

Table S4 Velocity and seasonal shift in sea surface temperature

Table S5 Predicted shifts in velocity and seasonal temperatures

Table S6 Distribution database

Table S7 Phenology database

## **Supplementary References**

## **Supplementary Methods & Results**

### ***What is an observation?***

We defined an observation as one where a biological response was, at a minimum, discussed in relation to expected impacts of climate change. We defined six classes of biological observations: abundance, distribution (range and depth), phenology, demography (including condition), calcification, and community (assemblage) composition (see Supplementary Table S2 for examples). We treated each observation class as independent for consistency analyses (see below), while recognising that there may be some relationships among changes in distribution, abundance, phenology and demography<sup>19</sup>. For example, changes in abundance can eventually lead to shifts in distribution, and have often been used to infer distribution shifts.

### ***Data extraction***

Data considering observed impacts of climate change on marine life were extracted from studies published in the peer-reviewed literature, whether a relationship was shown or not. We considered only studies published in the peer-reviewed literature (inclusive of peer-reviewed reports) and these were located through extensive searches using the ISI Web of Science, Google Scholar and through our own knowledge. Comprehensive searches were also conducted in six key journals devoted to climate change or marine research (*Global Change Biology*, *Marine Ecology Progress Series*, *Progress in Oceanography*, *Journal of the Marine Biological Association of the UK*, *Global Ecology and Biogeography* and *Journal of Fish Biology*) from 1990 through to December 2010.

We captured both single-species and multi-species studies of marine biological

responses, including null responses, and counted seabird, anadromous fish and polar bear studies as marine given their reliance on marine food sources. We defined the primary climate variable as the one identified by the authors as having the strongest relationship, or inferred as having the strongest relationship, with the biological observation. We selected all studies that focused on climate change regardless of whether the primary climate variable was temperature, sea ice, pH or “climate oscillation” such as the North Atlantic Oscillation index or Pacific Decadal Oscillation. 90% of the 208 studies identified temperature as the primary climate driver and 6% identified sea ice. Climate oscillations were included only where changes in their indices have been explicitly linked to global warming (3 studies<sup>28-30</sup>).

Time series had to include data after 1990 for comparison with recent climate change. The minimum span of time series included in the database was set at 19 yrs. This constraint was applied to minimize the chance of bias resulting from short-term biological responses to natural climate variability or non-climate related shifts. Most terrestrial syntheses of climate impacts on species used 20 years as the cutoff, with concessions made for certain studies to fill data gaps (reviewed in Parmesan<sup>12</sup>). However, there was no quantitative reason for setting a strict time limit at 20 yrs, and by relaxing the 20-yr rule, we added 85 observations from 9 studies of 61 species from the Atlantic, Indian, Pacific and Southern Oceans and the Mediterranean Sea.

For each observation, we recorded metadata including citation, biological observation, length of time series and sample density, organism/community identity, quantitative metrics of rates of change (if available), significance of tests of trends in biological response and attribution to climate change (where available), and whether other potential drivers of change (such as pollution, or exploitation) were considered (Supplementary Table S1). Coordinates for each study were taken as the “center of gravity” of the study area or the nearest ocean location for land breeding sites of polar bears, sea turtles and seabirds. Where distribution

surrounded an island or peninsula centroids were plotted leading to some points appearing to fall on land (Fig. 1A).

We identified whether each observation was from a single- or multi-species study. We defined the number of species in a study as the number of species for which observations were entered in the database. For example, if an author indicated that 40 species were sampled, but data and discussion were presented for only 20 of these, then the number of species recorded in the database was 20. If a study reported only on a subset of species but indicated that other species in the study showed non-significant responses, we included these latter observations as no change (and not statistically significant). Where further information may have been available, or where required information were unclear, advice was sought from the original authors. To ensure consistency in interpretation and accuracy of data extraction, each entry was reviewed two or three times, with at least one review was undertaken by ESP, AJR or CJB, who were in close communication.

Species were classified into taxonomic groups for analysis (Supplementary Table S3).

### ***Duplication***

Duplication can arise where multiple studies use the same dataset to investigate the same biological response in the same region. Duplication can also arise where multiple, potentially correlated, observations for a single species response in a region were reported within or among studies. For example, observations of first egg laying, peak egg laying and mean hatch date as spring phenology metrics at a single seabird colony are essentially capturing the same response of the species to climate change using different correlated metrics. We applied a filter to eliminate duplicate observations using the following rules: 1) were there multiple entries for a species for the same location? If yes, 2) for each observation class (Supplementary Table S2), were there multiple entries? If yes, 3) reject the observations



for which a statistical test for decadal change has not been applied (regardless of result). If multiple entries still remain, 4) reject the observations based on responses of individuals (eg first laying date) rather than metrics based on populations (e.g. peak laying date). If more than one observation remains, 5) select the observation with the longest time series.

### ***Changes in phenology and distribution***

Quantitative metrics of change for distribution were captured as  $\text{km dec}^{-1}$  and for phenology as  $\text{day dec}^{-1}$ . Where necessary, we converted study estimates to these standard measurements. Rates of change were taken directly from papers or supplementary material, calculated from data or figures in papers or supplementary material or supplied directly by the original authors. Depth changes were not converted into latitudinal equivalents for temperature clines as has been done for terrestrial examples (1 km northward = 1 m upward<sup>11</sup>), because of non-linear temperature discontinuities with depth in the ocean (thermoclines).

The location of the study within a species distributional range were taken from the studies, or estimated from distribution maps, e.g. FishBase ([www.fishbase.org](http://www.fishbase.org)). We classified each observation as leading edge (n=111), trailing edge (n=106) or centre (n=105). Centre of distribution encompassed any observations that were not leading or trailing edge e.g. abundance centre, mean latitude of occurrence. Leading edges were not restricted to the poleward edge of a distribution but were taken as any section at the edge of the distribution where it is likely that distribution may be moderated by cooler waters beyond the distributional edge. For example, expansions of intertidal invertebrates eastwards along the English Channel<sup>31, 35</sup> towards the colder North Sea were classified as leading edge expansions. Similarly, equatorward range shifts of flatfish in the southern North Sea<sup>32</sup> were also classified as leading edge as the species were previously excluded from these waters by

cold winter temperatures. Conversely, trailing range edges were taken as locations where it is possible that distributions may be constrained by warmer temperatures beyond the range edge. Changes in range edges were calculated as the average of all observed shifts, including no change observations.

19% of leading edge distributions and 16% of trailing edge distributions showed no change ( $0 \text{ km dec}^{-1}$ ), whilst 32% of 'centre' observations showed no change (Supplementary Fig S3). Of the observations that showed a response, 86% of leading edges ( $n=77$ ), 59% of trailing edges ( $n=83$ ) and 82% of centres ( $n=108$ ) shifted in the direction expected under climate change, generally polewards. Leading edges expanded by  $72.0 \pm 13.5 \text{ km dec}^{-1}$  (median  $24.9 \text{ km dec}^{-1}$ ), trailing edges contracted by  $15.8 \pm 8.7 \text{ km dec}^{-1}$  (median  $0.3 \text{ km dec}^{-1}$ ) and centres shifted polewards by  $9.5 \pm 2.1 \text{ km dec}^{-1}$  (median  $2.3 \text{ km dec}^{-1}$ ). Estimates of observations from the centre of species' distribution may be biased when the distribution changes outside the geographic region of the study, so may underestimate distribution shifts<sup>33</sup>.

Phenology observations were classified into seasons based on calendar month. Northern Hemisphere winter: December, January, February; spring: March, April, May; summer: June, July, August; autumn: September, October, November. Southern Hemisphere summer: December, January, February; autumn: March, April, May; winter: June, July, August; spring: September, October, November.

No change observations ( $0 \text{ days dec}^{-1}$ ) were rarer for quantitative phenology responses ( $n=125$ ); only 2 spring observations showed no change (Supplementary Fig S4). Of the observations that showed a response, 71% of spring phenology ( $n=49$ ) and 86% of summer phenology ( $n=51$ ) but only 42% of autumn phenology ( $n=14$ ) and 25% of winter phenology ( $n=8$ ) shifted in the direction expected under climate change, generally earlier for spring and summer events and later for autumn and winter. Spring phenology advanced by

$4.4 \pm 0.7$  days  $\text{dec}^{-1}$  (median 2.4 days  $\text{dec}^{-1}$ ) and summer by  $4.0 \pm 1.1$  days  $\text{dec}^{-1}$  (median 3.5 days  $\text{dec}^{-1}$ ). In contrast, autumn phenology delayed by  $0.4 \pm 1.2$  days  $\text{dec}^{-1}$  (median 1.6 days  $\text{dec}^{-1}$ ) and winter by  $2.1 \pm 2.5$  days  $\text{dec}^{-1}$  (median 1.4 days  $\text{dec}^{-1}$ ).

### ***Comparison with quantitative shifts in climate***

We compared reported responses of phenology and distribution with shifts predicted from the local velocity of climate change (VoCC) and seasonal climate shift (SCS) for the period 1960 to 2009, using global data from Burrows et al<sup>8</sup>.

Distribution shifts (n=362 observations) were matched to VoCC values for spatial shifts in average annual sea surface temperature, averaging all values from 1-degree grid cells within a circular buffer distance from each observation. The size of the reported shift in km as the size of the circular spatial buffer. A linear model was fitted to all 362 observations of distribution shift rate (fourth-root transformed km/decade) using local VoCC (same units) and taxonomic group as predictors (Supplementary Table S5). While taxa differed in rates of shift, no influence of local VoCC was detected. Omitting observations showing no shifts (zeros) changed this result markedly (Supplementary Table S5, Fig. 3A): rates of distribution shift were higher for those organisms in areas of higher velocity of climate change. The difference between analyses including and excluding observations of zero shifts appeared to be linked to the tendency for zero shifts to be reported more frequently in areas of high velocity of climate change (VoCC  $\geq 50$  km/decade: 37%, 39 of 106; VoCC  $< 50$  km/decade: 17%, 44 of 256). This was a surprising result, and perhaps suggests a greater influence of factors such as alternative responses to climate change, habitat availability, dispersal ability or biotic interactions in areas prone to rapid shifts.

Spring phenology responses (52 spring excluding 2 null responses) were similarly matched to SCS values for April (Northern Hemisphere) and October (Southern

Hemisphere). The buffer radius was set as the square root of the reported area of each observation, divided by  $\pi$ . A linear model was fitted to the spring phenology change data with local SCS and taxonomic group (using a reduced list of five taxa: benthic invertebrates, fish, seabirds, phytoplankton and zooplankton) as predictor variables. Each observation was weighted by the number of years comprising each study. No significant relationship with SCS emerged, but large statistically significant differences in phenology change existed among groups (Fig. 3B and Table S5). Benthic invertebrates showed the largest spring advance in phenology, followed by fish, zooplankton and phytoplankton, with seabirds showing both delay and advance in spring phenology.

### ***Consistency analysis***

In our database, we assigned each observation into 1 of 3 categories for consistency with climate change: 1. Response was ‘consistent’ with direction of change expected under climate change: 2. Response was ‘inconsistent’ with direction of change expected under climate change or the consistency with or against climate change was unclear, that is no clear expectation of change was given or was available post hoc: and 3. ‘No change’ indicating no response was found. We focused on the authors’ expectations of direction of response to climate change rather than apply general expectations such as poleward shifts and earlier spring events. We therefore captured responses that are inconsistent with general expectations but consistent when regional climate is taken into account. For example, later arrival and egg-laying of seabirds in the Antarctic linked to a regional decrease in sea-ice extent which impacts the quantity and accessibility of food supplies<sup>34</sup>. See also examples in ***Changes in distribution and phenology*** section above.

We used a generalized linear model with a binomial error structure. The response was the

proportion consistent and the predictors were taxa, biome and observation type. A visual assessment of residuals suggested that the variance and distribution assumptions were met. The proportion consistent differed significantly among taxa, biomes and observation types. Tukey-type post-hoc comparisons for each predictor were conducted using the general linear hypotheses and multiple comparisons for parametric models in R. For taxa, there were six significant differences (Fig. 4; full data set): bony fish and benthic algae ( $p < 0.01$ ), phytoplankton and benthic algae ( $p < 0.05$ ), zooplankton and benthic algae ( $p < 0.001$ ), zooplankton and benthic crustacean ( $p < 0.05$ ), zooplankton and benthic molluscs ( $p < 0.05$ ), and zooplankton and bony fish ( $p < 0.05$ ). For biome, there were three significant differences: subtropical vs polar ( $p < 0.05$ ), tropical vs polar ( $p < 0.05$ ), temperate vs subtropical ( $p < 0.05$ ). For observation type there were three significant differences: phenology vs abundance ( $p < 0.01$ ), phenology vs demography ( $p < 0.05$ ), phenology vs distribution ( $p < 0.001$ ).

### ***Biases***

The complication of publication bias was considered in previous meta-analyses following a number of approaches including selection of studies that report a statistically significant response to climate change only<sup>3,4</sup> or selection of multi-species studies that also report neutral and negative results<sup>11,12</sup>. We found the latter approach, analysing data from only multi-species studies, reduced overall consistency of responses to climate change to 81% ( $n=1151$ ), but still well above the 50% level expected on the basis of chance alone. Reductions in proportion consistent occurred for benthic invertebrates (other), crustacean, molluscs, seabirds, bony fish and zooplankton (Figure 4). This implies positive publication bias of single-species studies affected meta-analytic results for these taxonomic groups. However, with the exception of benthic invertebrates (other), all taxonomic groups still showed proportions consistent significantly above the 50% level. There were large increases

in standard error for polar and tropical regions due to loss of data points, and there was also a reduction in rates of consistency for temperate regions. Phenology, abundance and distribution responses also showed declines in proportion consistent, but remained high at >70% consistent.

Second, responses to climate change can be difficult to distinguish from responses to low-frequency climate variability, which may mask or accentuate patterns and biotic responses. For example, interdecadal ecosystem variability forced by drivers of El Niño-Southern Oscillation, Atlantic Multidecadal Oscillation or Pacific Decadal Oscillation may have influenced many of the studies we synthesized. Taking only studies which spanned 30 yrs or more, to account for variability on decadal-scales, had little discernible influence on our findings (81% consistent, n=497; Supplementary Figure S5).

Third, species' responses may be modified (either accentuated or mitigated) by drivers of change other than climate change. For example, the response of fish populations to climate change is affected by the degree to which populations have been altered by fishing<sup>32,33</sup>, which can make stocks more vulnerable to climate change by reducing life expectancy, truncating age structure, and reducing spatial heterogeneity, among other factors. We controlled for many of these factors in our analyses, but recognize the limitations in assigning actual percent contribution of climate versus other factors to realized species changes. In the database, 71% of all relationships between biology and physics included only climate variables and did not consider alternative drivers. These studies could over-estimate the effect of climate change as they do not partition out other pervasive human pressures, such as fishing, eutrophication, species introductions and habitation destruction; neither do they resolve effects of natural climate variability. However, analysing only the subset of studies that discounted the role of alternate drivers from our database had little impact on results (80% consistent, n=1200) (Supplementary Figure S6), suggesting that our conclusions

were robust to exclusion of multiple factors in most studies. Among taxonomic groups for which sufficient data remained for analysis, benthic molluscs and crustaceans were the only groups to change from showing a significant (>50%) to non-significant response. This result may be conservative, however, because it excluded rocky-shore studies with benthic mollusc data for which anthropogenic drivers other than climate change are unlikely to play a role in specific responses observed. Rates of consistency of the observed changes in abundance with climate change declined, but was still >0.6; for phenology rates of consistency increased when analyzing only the subset of the data.

### ***Attribution***

Studies that were able to demonstrate a clear climate-related process behind observed changes give additional credence to attribution<sup>11,16</sup>. Systematic responses within regions and across regions, uniquely predicted by climate change, are a powerful diagnostic fingerprint of climate change<sup>11,16</sup>. These broad-scale responses include: 1. Broad changes within local communities or ecosystems, with abundances of warm-water species changing in the opposite direction to colder-water species; 2. Differential responses in populations of a species across distributions consistent with climate change e.g., expansion of distribution at leading edges and contraction at trailing edges or consistent responses at geographically separate range edges.

We found numerous examples of diagnostic fingerprints of climate change<sup>1</sup> in our database. 28 of 29 community or ecosystem studies show increases in the abundance of ‘warm-water’ species and declines of ‘cold-water’ species concurrent with warming. These include communities of fish in the Bay of Biscay<sup>36</sup>, fish in the North Sea<sup>37,38</sup>, fish in the SW Pacific<sup>39</sup>, mysids in marine caves in the Mediterranean<sup>40</sup>, plankton in the North Sea<sup>41</sup> and Mediterranean<sup>42</sup> and intertidal invertebrates in the NE Atlantic<sup>43</sup> and NE Pacific<sup>44</sup>.

Diagnostic patterns of climate forcing include spatial sign-switching, in which opposing responses to warming trends are observed at a mixture of leading and trailing range boundaries, and consistent responses at geographically locations along distinct leading or trailing range edges. For example, expansions of distributions at leading edge (polewards) range boundaries and contractions at trailing edge (equatorwards) range boundaries. Of the 35 species for which data were available at broadly distributed range edges, 24 showed differential responses that were consistent with climate change. These include the intertidal barnacle *Austromegabalanus nigrescens* in the south-west Pacific, which has contracted at its trailing edge<sup>45</sup> and expanded its leading edge<sup>46</sup>, and the intertidal mollusc *Osilinus lineatus* which is expanding at three separate leading-edges: northwards (polewards) along the Northern Ireland and North Wales coastlines<sup>47</sup>, and eastwards along the English Channel<sup>48</sup>. More subtle changes in abundances and individual growth rates also reflect this type of sign-switching. For example, in the south-west Pacific, Neuheimer et al.<sup>49</sup> document opposing growth rate responses in fish populations at the center (where warming is shown to be associated with increased growth rates of individuals) and trailing edges of their distribution (where warming is shown to be associated with decreased individual growth).



## Supplementary Figures

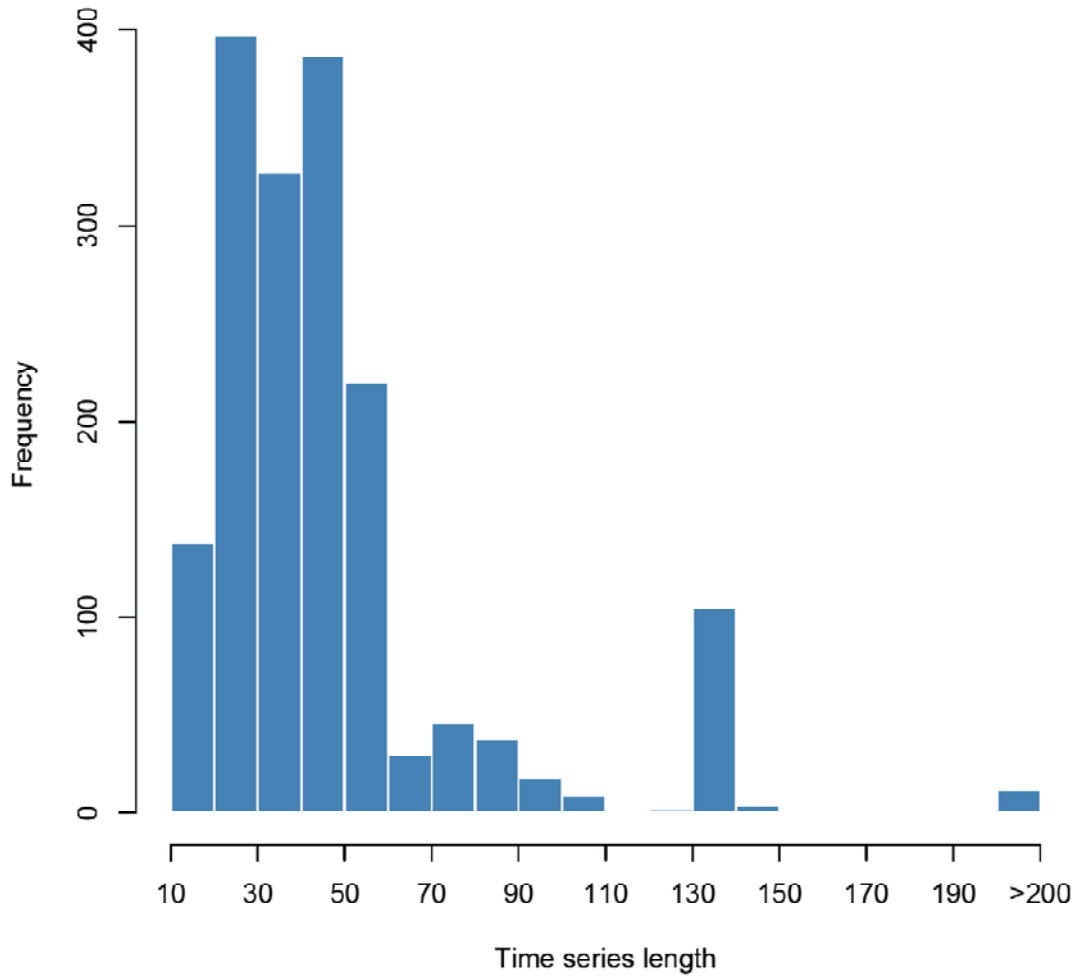

**Supplementary Figure S1.** Time span of observations included in the Marine Impacts database.

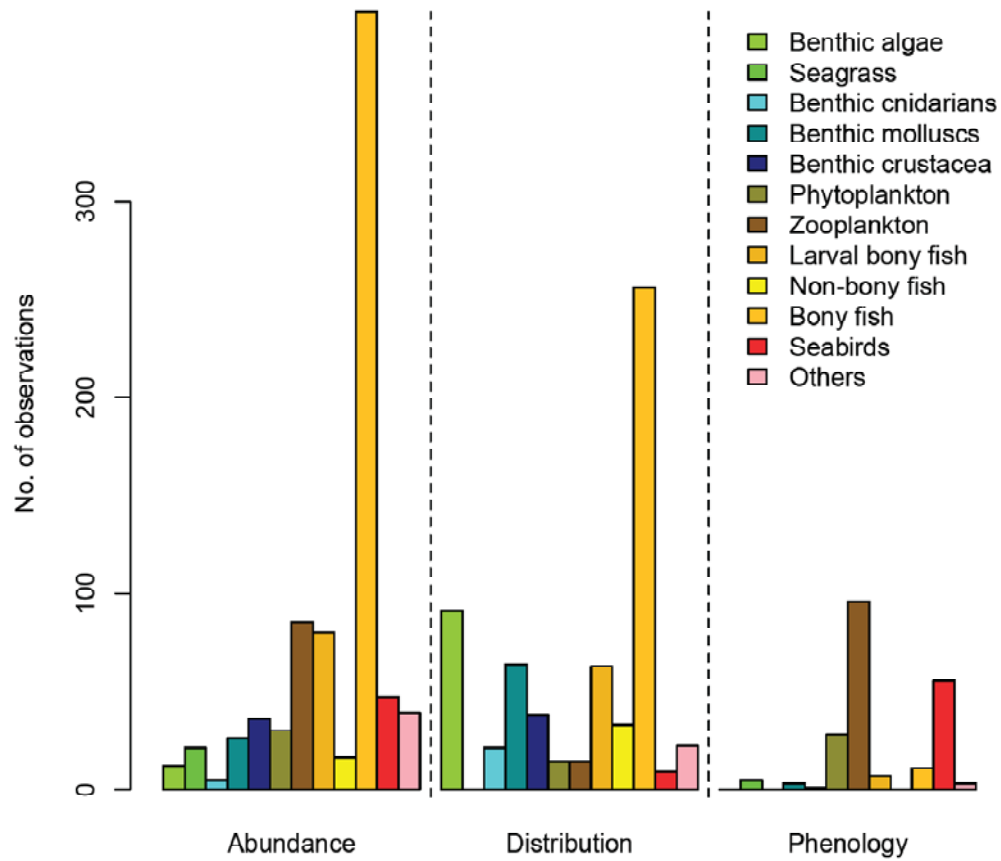

**Supplementary Figure S2.** Observations included in the Marine Impacts database. Frequency of responses in abundance, distribution and phenology across taxonomic groups. Demography (n=48), calcification (n=27) and community change (n=32) not shown. Others = mammals, mangroves, seagrass, squid and sea turtles.

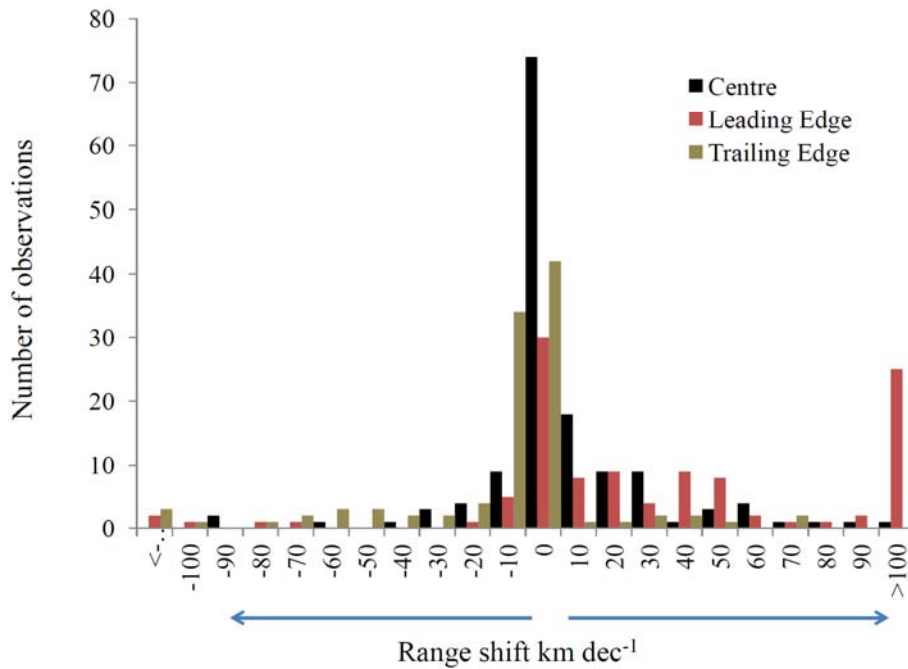

**Supplementary Figure S3.** Frequency histogram of range shifts from leading edge (n=111), trailing edge (n=106) and centre of distributions (n=142) for marine species, taken from 36 peer-reviewed studies (see Supplementary Table S1) of 318 species or functional groups. Minimum value for each category given on x axis. In general, positive range shifts are consistent with climate change at centre of distribution (100%) and leading edges (100%) and inconsistent with climate change at trailing edges (96%). Negative range shifts are generally inconsistent with climate change at centre of distributions (100%) and leading edges (88%) and consistent with climate change at trailing edges (100%). Some expansions and distributions are influenced by regional climate so may not conform to general expectations. For example, strengthening of upwelling systems leading to regional cooling and possible expansions (positive range shifts) at trailing edges.

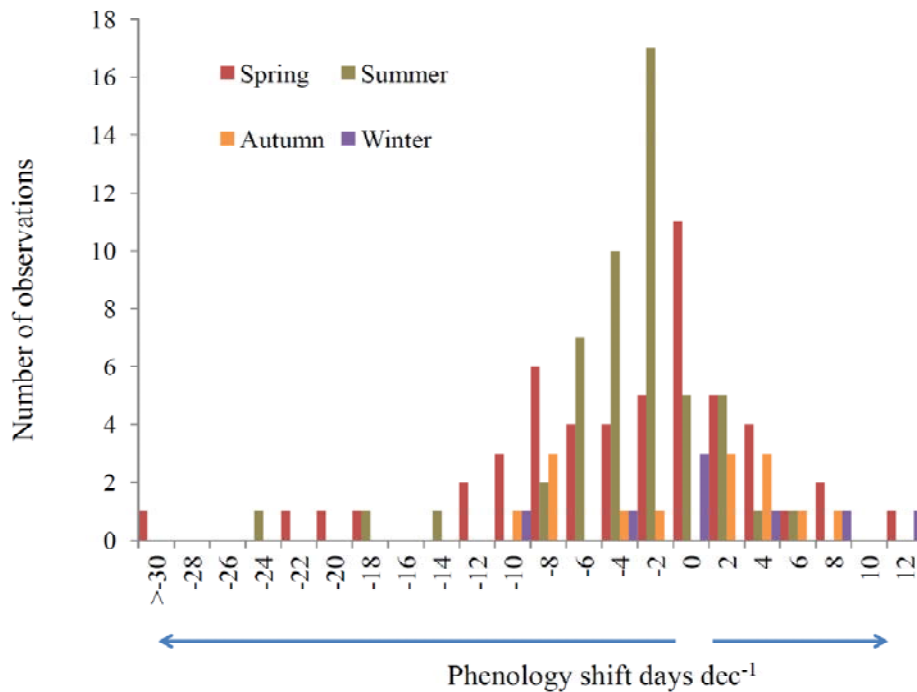

**Supplementary Figure S4.** Frequency histogram of shifts in phenology for spring (n=52), summer (n=51), autumn (n=14) and winter (n=8) events for marine species, taken from 26 peer-reviewed studies (see Supplementary Table S1) of 92 species or functional groups. Maximum value for each category given on x axis. In general, negative phenology shifts (advancement) are considered consistent with climate change during spring (97% consistent with responses expected from climate change) and summer (100%) and inconsistent during autumn (0%) and winter (0%). Positive phenology shifts (delays) are generally considered inconsistent with climate change during spring (90%) and summer (86%) and consistent with climate change during autumn (25%) and winter (83%). Some advancements and delays are influenced by regional climate so may not conform to general expectations.

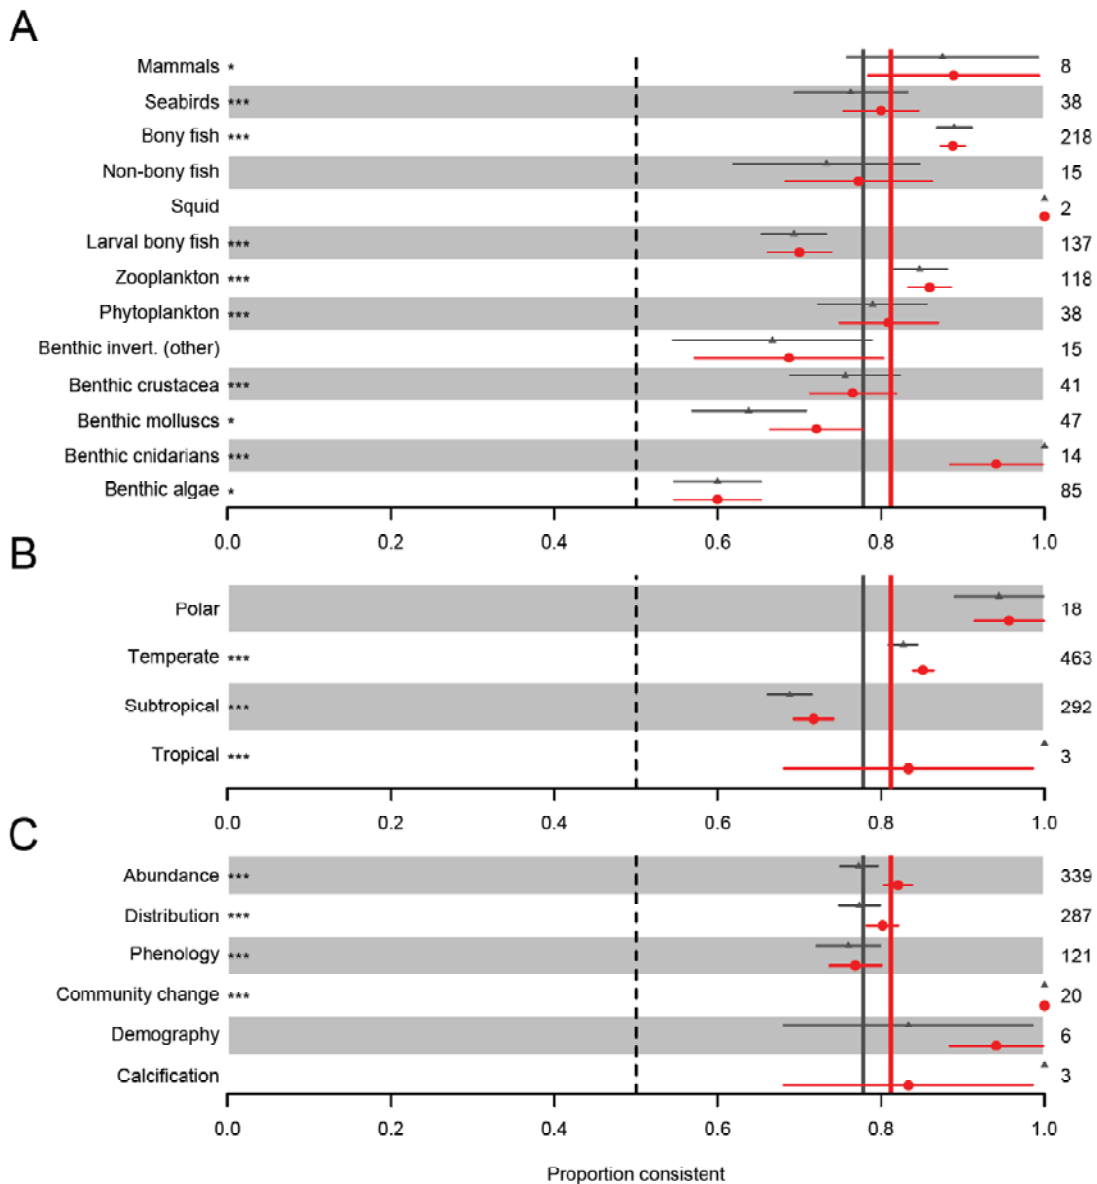

**Supplementary Figure S5.** Percent of marine observations consistent with climate change using data from multi-species studies (red circles), and from observations that span >30 years to explore the influence of biases from natural decadal variability (grey triangles). Mean and standard error of responses by (A) taxonomic or functional group, (B) latitudinal region and (C) response measure show significantly higher consistency than expected from random (dashed line at 50% consistency). Solid lines are the mean across all observations. Significance of results for dataset of observations >30 years (grey triangles) are listed next to labels (\*\*\*:  $p < 0.001$ ; \*\*:  $p < 0.01$ ; \*:  $p < 0.05$ ) and sample sizes to the right of each row. Sample sizes and significance of results for dataset from multi-species studies (red circles) are given in Figure 4.

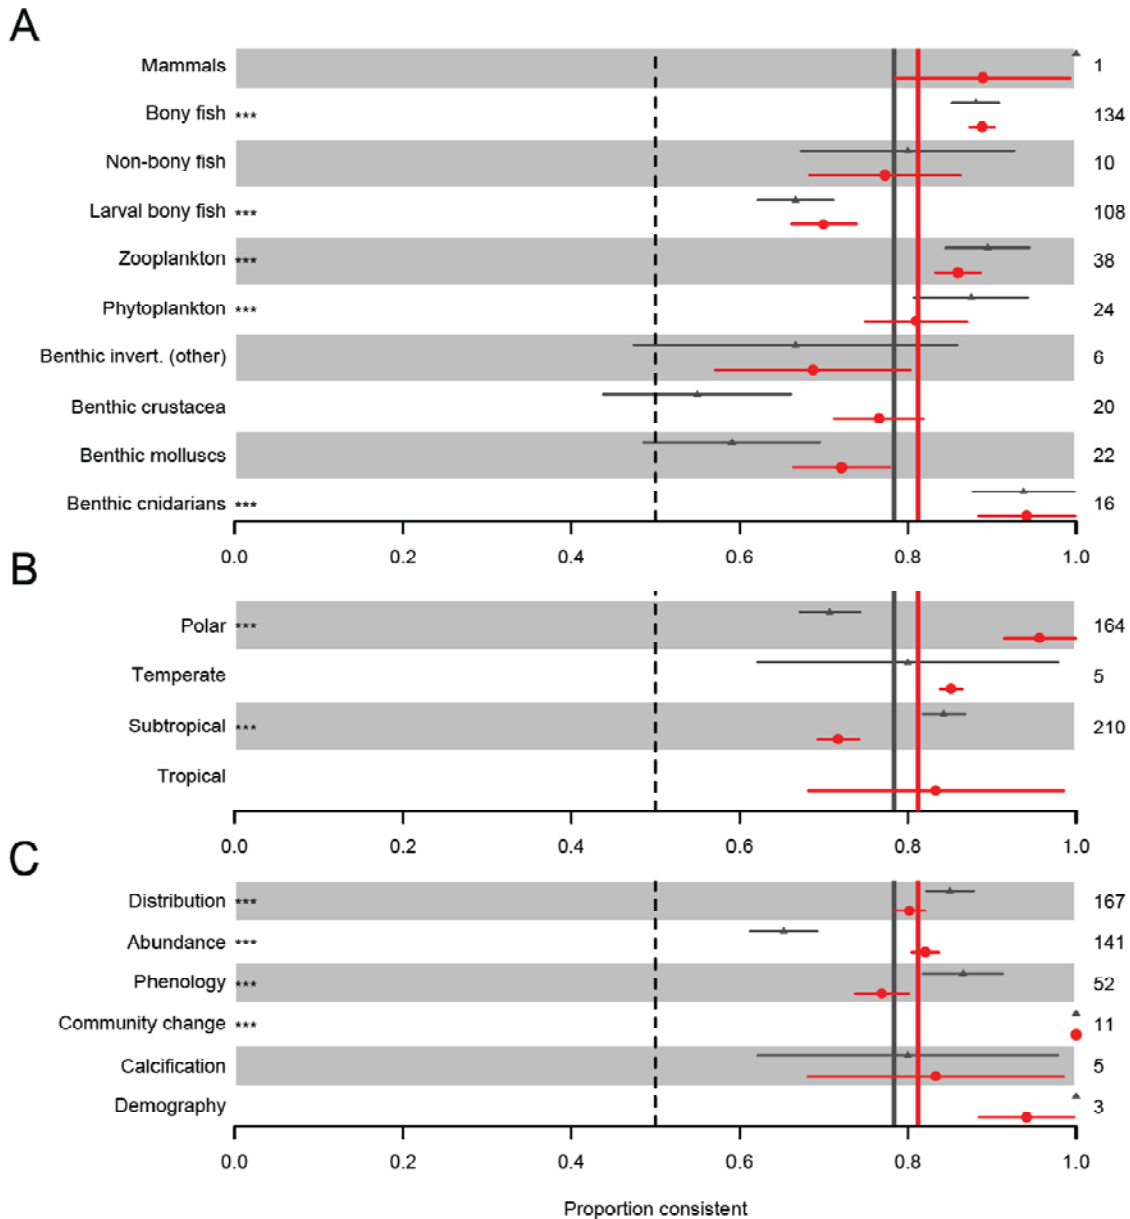

**Supplementary Figure S6.** Percent of marine observations consistent with climate change using data from multi-species studies (red circles), and observations from studies that discount the influence of other drivers of change (grey triangles). Mean and standard error of responses by (A) taxa, (B) latitudinal region and (C) response measure show significantly higher consistency than expected from random (dashed line at 50% consistency). Solid lines are the mean across all observations. Significance of results are listed next to labels (\*\*\*:  $p < 0.001$ ; \*\*:  $p < 0.01$ ; \*:  $p < 0.05$ ). Significance of results for dataset of observations >30 years (grey triangles) are listed next to labels (\*\*\*:  $p < 0.001$ ; \*\*:  $p < 0.01$ ; \*:  $p < 0.05$ ) and sample sizes to the right of each row. Sample sizes and significance of results for dataset from multi-species studies (red circles) are given in Figure 4.

## Supplementary Tables

See separate file for **Table S1: Database content**

**Table S2: Observation classes, general expected responses to change in climate (*vice versa* for change in climate in opposite direction), and examples of metrics.**

| Observation class     | Change in climate and expectations in response to change                                                 | Metrics                                                                                                                                                                                                                                                                      |
|-----------------------|----------------------------------------------------------------------------------------------------------|------------------------------------------------------------------------------------------------------------------------------------------------------------------------------------------------------------------------------------------------------------------------------|
| Abundance             | Warming: Increase in warm-water species, decline in cold-water species                                   | Annual landings <sup>50</sup> , categorical abundance <sup>51</sup> , mean density <sup>38</sup>                                                                                                                                                                             |
| Distribution          | Warming: Polewards shift in distributions, shift into deeper water or lower shore height                 | range edge location <sup>53,54</sup> , mean latitude of occurrence <sup>55</sup> , mean depth <sup>55,56</sup> , mean shore height <sup>57</sup>                                                                                                                             |
| Phenology             | Warming: earlier spring and summer events, delays in autumn and winter events                            | First laying date <sup>58</sup> , mean hatch date <sup>59</sup> , duration of nesting season <sup>60</sup> , mean/median nesting date <sup>61</sup> , first spawning date <sup>62</sup> , month of maximum abundance <sup>63</sup> , month of first appearance <sup>64</sup> |
| Demography            | Warming: increase survival rates and breeding success of warm water species, increase in coral bleaching | Breeding success <sup>34</sup> , survival rate <sup>65</sup> , percent coral bleached <sup>56</sup>                                                                                                                                                                          |
| Calcification         | pH decline: decline in calcification rates, decrease in shell/test mass and density.                     | Mean shell mass <sup>67</sup> , skeletal density <sup>68</sup> , extension/growth rate <sup>69</sup>                                                                                                                                                                         |
| Community composition | Warming: increase in warm water/cold water species ratio, increase in species richness                   | Diversity <sup>70</sup> , community structure <sup>71</sup> , species richness <sup>72</sup>                                                                                                                                                                                 |

**Table S3. Taxonomic groupings for meta-analysis**

| <b>Taxonomic group</b>        | <b>Contents</b>                                                                                                                  |
|-------------------------------|----------------------------------------------------------------------------------------------------------------------------------|
| Mangroves                     | Mangrove tree ( <i>Bruguiera gymnorrhiza</i> )                                                                                   |
| Benthic algae                 | Brown macroalgae, green macroalgae, red macroalgae                                                                               |
| Seagrass                      | Seagrasses only: <i>Zostera</i> sp., <i>Halodule</i> sp., <i>Posidonia</i> sp.                                                   |
| Benthic cnidarians            | Post-larval stages only: Sea anemones, hard corals, gorgonians                                                                   |
| Benthic crustacea             | Post-larval stages only: Barnacles, crabs, shrimps, lobsters, mysids                                                             |
| Benthic invertebrates (other) | Post-larval stages only: Annelids, bryozoans, echinoderms, insects                                                               |
| Benthic molluscs              | Post-larval stages only: Gastropods, bivalves, chitons                                                                           |
| Phytoplankton                 | Coccolithophores, diatoms, dinoflagellates                                                                                       |
| Zooplankton                   | Larval and egg stages only: Annelids, crustacea, molluscs, bryozoans, copepods, echinoderms, forams, pteropods, tunicates, salps |
| Larval bony fish              | Larval and egg stages only: Bony fish                                                                                            |
| Bony fish                     | Post-larval stages only: Demersal and pelagic bony fish                                                                          |
| Non-bony fish                 | Post-larval stages only: Sharks, rays, lamprays, hagfish                                                                         |
| Squid                         | Post-larval stages only: <i>Dosidicus</i> sp, <i>Loligo</i> sp.                                                                  |
| Turtles                       | Sea turtles only: <i>Caretta caretta</i>                                                                                         |
| Seabirds                      | All life stages: egg, juvenile and adult                                                                                         |
| Mammals                       | Polar bears, seals, whales and dolphins                                                                                          |



**Table S4. Velocity of temperature and seasonal shift in spring temperature over 1960-2009 calculated using the Hadley Centre data set HadISST 1.1 dataset and methods presented in Burrows et al<sup>8</sup>. April temperatures used for northern hemisphere (N) seasonal shift and October temperatures for southern hemisphere (S). Values shown are medians, with 25th and 75th percentiles in parentheses, calculated using area-weighted data.**

| Region               | Latitude  | Velocity km dec <sup>-1</sup> | Spring Seasonal Shift days dec <sup>-1</sup><br>(N: April, S: October) | Fall Seasonal Shift days dec <sup>-1</sup><br>(N: October, S: April) |
|----------------------|-----------|-------------------------------|------------------------------------------------------------------------|----------------------------------------------------------------------|
| Northern Polar       | >66°N     | 48.7 (20.6, 112.2)            | -2.5 (-16.7, -11.2)                                                    | 2.9 (0.7, 4.9)                                                       |
| Northern Temperate   | 40-66°N   | 31.3 (14.7, 55.6)             | -2.9 (-5.5, -3.7)                                                      | 2.0 (1.3, 2.2)                                                       |
| Northern Subtropical | 23.5-40°N | 20.3 (7.5, 39.1)              | -1.7 (-3.5, -1.7)                                                      | 1.2 (0.3, 1.3)                                                       |
| Northern Tropical    | 0-23.5°N  | 52.8 (21.8, 143.8)            | -3.0 (-6.0, -4.7)                                                      | 4.6 (-3.1, 5.2)                                                      |
| Southern Tropical    | 0-23.5°S  | 50.0 (24.4, 106.8)            | -5.9 (-11.5, -10.9)                                                    | 4.4 (0.5, 3.8)                                                       |
| Southern Subtropical | 23.5-40°S | 14.7 (6.4, 21.7)              | -2.7 (-4.2, -2.6)                                                      | 2.9 (1.6, 3.0)                                                       |
| Southern Temperate   | 40-66°S   | 2.6 (-4.7, 9.0)               | -1.5 (-5.8, -2.6)                                                      | 1.4 (-0.2, 2.2)                                                      |
| Southern Polar       | >66°S     | -7.7 (-29.9, 11.2)            | -4.6 (-14.8, -10.7)                                                    | 0.2 (-3.4, 0.1)                                                      |

**Table S5. Linear models predicting rate of shift in (A) spring phenology from taxonomic group and local spring Seasonal Climate Shift (SCS), and (B) distribution from taxon and local Velocity of Climate Change (VOCC), including and excluding no-shift observations.**

(A) Phenology shift rate (days/decade) versus Spring (April/October) seasonal shift (days/decade). Benthic invertebrates were the reference group, so had a coefficient of zero.

Adjusted R-squared: 0.4792; F-statistic: 10.39 on 5 and 46 DF, p-value: 1.039e-06

| Coefficients:                 | Estimate | SE    | t value | Pr(> t ) |     |
|-------------------------------|----------|-------|---------|----------|-----|
| (Intercept)                   | -18.108  | 4.277 | -4.23   | 0.0001   | *** |
| Spring Seasonal Climate Shift | 0.047    | 0.435 | 0.11    | 0.9146   |     |
| Fish                          | 9.186    | 4.128 | 2.23    | 0.0310   | *   |
| Phytoplankton                 | 11.545   | 4.110 | 2.81    | 0.0073   | **  |
| Seabirds                      | 18.882   | 3.760 | 5.02    | <0.0001  | *** |
| Zooplankton                   | 8.018    | 4.134 | 1.94    | 0.0586   | .   |

(B) Distribution shift rate (fourth-root transformed km/decade) versus velocity of climate change (fourth-root transformed absolute value km/decade, 1960-2009). Benthic algae were the reference group, so had a coefficient of zero.

*Including zero shifts*

Adjusted R-squared: 0.1763; F-statistic: 13.88 on 6 and 355 DF, p-value: 3.451e-14

| Coefficients:                       | Estimate | SE    | t value | Pr(> t ) |     |
|-------------------------------------|----------|-------|---------|----------|-----|
| (Intercept)                         | 2.089    | 0.352 | 5.93    | <0.0001  | *** |
| $\sqrt[4]{\text{abs}(\text{VoCC})}$ | -0.209   | 0.100 | -2.10   | 0.0364   | *   |
| Benthic invertebrates               | -0.076   | 0.274 | -0.28   | 0.7809   |     |
| Fish                                | -0.084   | 0.243 | -0.35   | 0.7306   |     |
| Mammals                             | 4.025    | 1.223 | 3.29    | 0.0011   | **  |
| Phytoplankton                       | 2.781    | 0.606 | 4.59    | <0.0001  | *** |
| Zooplankton                         | 1.395    | 0.316 | 4.41    | <0.0001  | *** |

*Excluding zero shifts*

Adjusted R-squared: 0.3125; F-statistic: 22.06 on 6 and 272 DF, p-value: < 2.2e-16

| Coefficients:                       | Estimate | SE    | t value | Pr(> t ) |     |
|-------------------------------------|----------|-------|---------|----------|-----|
| (Intercept)                         | 0.687    | 0.277 | 2.48    | 0.0136   | *   |
| $\sqrt[4]{\text{abs}(\text{VoCC})}$ | 0.453    | 0.085 | 5.34    | <0.0001  | *** |
| Benthic invertebrates               | 0.582    | 0.196 | 2.97    | 0.0033   | **  |
| Fish                                | 0.336    | 0.171 | 1.97    | 0.0500   | .   |
| Mammals                             | 3.200    | 0.763 | 4.19    | <0.0001  | *** |
| Phytoplankton                       | 2.672    | 0.383 | 6.98    | <0.0001  | *** |
| Zooplankton                         | 1.195    | 0.209 | 5.73    | <0.0001  | *** |

See separate file for **Table S6: Distribution database**

See separate file for **Table S7: Phenology database**

### Supplementary References

28. Sydeman, W. J. *et al.* Climate change, reproductive performance and diet composition of marine birds in the southern California Current system, 1969-1997. *Prog. Oceanogr.* 49, 309-329 (2001).
29. Hemery, G. *et al.* Detecting the impact of oceano-climatic changes on marine ecosystems using a multivariate index: The case of the Bay of Biscay (North Atlantic-European Ocean). *Glob. Change Biol.* 14, 27-38 (2008).
30. Lewis, S., Elston, D. A., Daunt, F., Cheney, B. & Thompson, P. M. Effects of extrinsic and intrinsic factors on breeding success in a long lived seabird. *Oikos* 118, 521-528 (2009).
31. Herbert, R. J. H., Hawkins, S. J., Sheader, M., & Southward, A. J. Range extension and reproduction of the barnacle *Balanus perforatus* in the eastern English Channel. *J. Mar. Biol. Assoc. UK* 83, 73-82 (2003).
32. Engelhard, G. H., Pinnegar, J. K., Kell, L. T. & Rijnsdorp, A. D. Nine decades of North Sea sole and plaice distribution. *ICES J. Mar. Sci.* 68, 1090-1104 (2011).
33. Hsieh, C., Reiss, C.S., Hewitt, R.P. & Sugihara, G. Spatial analysis shows that fishing enhances the climatic sensitivity of marine fishes. *Can. J. Fish. Aquat. Sci.* 65, 947-961 (2008).
34. Barbraud, C. & Weimerskirch, H. Antarctic birds breed later in response to climate change. *Proc. Natl. Acad. Sci. USA* 103, 6248-6251 (2006).
35. Herbert, R. J. H., Southward, A. J., Sheader, M., & Hawkins, S. J. Influence of recruitment and temperature on the distribution of intertidal barnacles in the English Channel. *J. Mar. Biol. Assoc. UK* 87, 487-499 (2007).
36. Desaunay, Y., Guerault, D., Le Pape, O. & Poulard, J. Changes in occurrence and abundance of northern/southern flatfishes over a 20-year period in a coastal nursery area (Bay of Vilaine) and on the eastern continental shelf of the Bay of Biscay. *Sci. Mar. (Barc.)* 70SI, 193-200 (2006).
37. Hiddink, J.G. & ter Hofstede, R. Climate induced increases in species richness of marine fishes. *Glob. Change Biol.* 14, 453-460 (2008).

38. Tulp, I., Bolle, L.J. & Rijnsdorp, A. D. Signals from the shallows: In search of common patterns in long-term trends in Dutch estuarine and coastal fish. *Neth. J. Sea Res.* 60, 54-73 (2008).
39. Last, P. R., *et al.* Long-term shifts in abundance and distribution of a temperate fish fauna: a response to climate change and fishing practices. *Global Ecol. Biogeogr.* 20, 58-72 (2010).
40. Chevaldonne, P. & Lejeusne, C. Regional warming-induced species shift in north-west Mediterranean marine caves. *Ecol. Lett.* 6, 371-379 (2003).
41. Wiltshire, K.H., *et al.* Helgoland Roads, North Sea: 45 years of change. *Estuar. Coast.* 33, 295-310 (2010).
42. Tunin-Ley, A., Ibanez, F., Labat, J-P., Zingone, A. & Lemee, R. Phytoplankton biodiversity and the NW Mediterranean Sea warming: changes in the dinoflagellate genus *Ceratium* in the 20th century. *Mar. Ecol. Progr. Ser.* 375, 85-99 (2009).
43. Hawkins, S. J., *et al.* Complex interactions in a rapidly changing world: responses of rocky shore communities to recent climate change. *Clim. Res.* 37, 123-133 (2008).
44. Sagarin, R. D., Barry, J. P., Gilman, S. E. & Baxter, C. H. Climate-related change in an intertidal community over short and long time scales. *Ecol. Monogr.* 69, 465-490 (1999).
45. Poloczanska, E.S., *et al.* Little change in the distribution of rocky shore faunal communities on the East Australian coast after 50 years of rapid warming. *J. Exp. Mar. Biol. Ecol.* 400, 145-154 (2011).
46. Pitt, N., Poloczanska, E. S. & Hobday, A. J. Climate-driven range changes in Tasmanian intertidal fauna. *Mar. Freshwater Res.* 61: 963-970 (2010).
47. Mieszkowska, N., Hawkins, S. J., Burrows, M. T. & Kendall, M. A. Long-term changes in the geographic distribution and population structures of *Osilinus lineatus* (Gastropoda : Trochidae) in Britain and Ireland. *J. Mar. Biol. Assoc. UK* 87, 537-545 (2007).
48. Mieszkowska, N., *et al.* Changes in the range of some common rocky shore species in Britain - a response to climate change? *Hydrobiologia* 555, 241-251 (2006).
49. Neuheimer, A. B., Thresher, R. E., Lyle, J. M. & Semmens, J. M. Tolerance limit for fish growth exceeded by warming waters. *Nature Clim. Change* 1, 110-113 (2011).
50. Sabates, A., Martin, P., Lloret, J. & Raya, V. Sea warming and fish distribution: the case of the small pelagic fish, *Sardinella aurita*, in the western Mediterranean. *Glob. Change Biol.* 12, 2209-2219 (2006).

51. Simkanin *et al.*, Using historical data to detect temporal changes in the abundances of intertidal species on Irish shores. *J. Mar. Biol. Ass. UK* 85, 1329 (2005).
52. Boyce, D.G., Lewis, M. R. & Worm, B. Global phytoplankton decline over the past century. *Nature* 466, 591-596 (2010).
53. Wetthey, S. & Woodin, S.A. Ecological hindcasting of biogeographic responses to climate change in the European intertidal zone. *Hydrobiologia* 606, 139-151 (2008).
54. Yamano, H. Sugihara, K. & Nomura, K. Rapid poleward range expansion of tropical reef corals in response to rising sea surface temperatures. *Geophys. Res. Lett.* 38, L04641 (2011).
55. Perry, A. L., Low, P. J., Ellis, J. R. & Reynolds J. D. Climate change and distribution shifts in marine fishes. *Science* 308, 1912-1915 (2005).
56. Dulvy, N. K. *et al.*, Climate change and deepening of the North Sea fish assemblage: a biotic indicator of warming seas. *J. Appl. Ecol.* 45, 1029-1039 (2008).
57. Gilman, E., Ellison, J. & Coleman, R. Assessment of mangrove response to projected relative sea-level rise and recent historical reconstruction of shoreline position. *Environ. Monit. Assess.* 124, 105-130 (2007).
58. Wanless, S., Frederiksen, M., Walton, J. & Harris, M. P. Long-term changes in breeding phenology at two seabird colonies in the western North Sea. *Ibis* 151, 274-285 (2009).
59. Abraham, C. L. & Sydeman, W. J. Ocean climate, euphausiids and auklet nesting: inter-annual trends and variation in phenology, diet and growth of a planktivorous seabird, *Ptychoramphus aleuticus*. *Mar. Ecol. Prog. Ser.* 274, 235-250 (2004).
60. Mazaris, D., Kallimanis, A. S., Sgardelis, S. P. & Pantis, J. D. Do long-term changes in sea surface temperature at the breeding areas affect the breeding dates and reproduction performance of Mediterranean loggerhead turtles? Implications for climate change. *J. Exp. Mar. Biol. Ecol.* 367, 219-226 (2008).
61. Pike, A., Antworth, R. L. & Stiner, J. C. Earlier nesting contributes to shorter nesting seasons for the Loggerhead Seaturtle, *Caretta caretta*. *J. Herpetol.* 40, 91-94 (2006).
62. Beukema, J. J., Dekker, R. & Jansen, J. M. Some like it cold: populations of the tellinid bivalve *Macoma balthica* (L.) suffer in various ways from a warming climate. *Mar. Ecol. Prog. Ser.* 384, 135-145 (2009).
63. Greve, W., Reiners, F. & Nast, J. Biocoenotic changes of the zooplankton in the German Bight: The possible effects of eutrophication and climate. *ICES J. Mar. Sci.* 53, 951-956 (1996).

64. Costello, J. H., Sullivan, B. K. & Gifford, D. J. A physical-biological interaction underlying variable phenological responses to climate change by coastal zooplankton. *J. Plankton Res.* 28, 1099-1105 (2006).
65. Rivalan, P., Barbraud, C., Inchausti, P. & Weimerskirch, H. Combined impacts of longline fisheries and climate on the persistence of the Amsterdam Albatross *Diomedea amsterdamensis*. *Ibis* 152, 6-18 (2010).
66. Hoegh-Guldberg, O. Climate change, coral bleaching and the future of the world's coral reefs. *Mar. Freshwater Res.* 50, 839-866 (1999).
67. Moy, D., Howard, W. R., Bray, S. G. & Trull, T. W. Reduced calcification in modern Southern Ocean planktonic foraminifera. *Nature Geosci.* 2, 276-280 (2009).
68. Cooper, T. F., De 'Ath, G., Fabricius, K. E. & Lough, J. M. Declining coral calcification in massive *Porites* in two nearshore regions of the northern Great Barrier Reef. *Glob. Change Biol.* 14, 529-538 (2008).
69. Cantin, N. E., Cohen, A. L., Karnauskas, K. B., Tarrant, A. M. & McCorkle, D. C. Ocean warming slows coral growth in the central Red Sea. *Science* 329, 322-325 (2010).
70. Beaugrand, G., Luczak, C. & Edwards, M. Rapid biogeographical plankton shifts in the North Atlantic Ocean. *Glob. Change Biol.* 15, 1790-1803 (2009).
71. Collie, J. S., Wood, A. D. & Jeffries, H. P. Long-term shifts in the species composition of a coastal fish community. *Can. J. Fish. Aquat. Sci.* 65, 1352-1365 (2008).
72. Hiddink, J. G. & ter Hofstede, R. Climate induced increases in species richness of marine fishes. *Glob. Change Biol.* 14, 453-460 (2008).

## Global imprint of climate change on marine life

**Supplementary Table S1.** Full Database. Obs = Observation class (see Supplementary Table 2), Taxa = taxonomic group, Biome, Region, Study Area = size of study site, Start Year = first year of data series, Timespan, N Sp = number of species in study, N. Con = number of observations consistent with climate change, No change = number of observations showing no change, N. Incon = numbers of observation inconsistent with climate change, N Data Points = total number of observations from each study, Alt Drivers? = other drivers of change considered, Stat Tests = statistical tests applied to show a relationship with changing climate.

| Obs.             | Taxa          | Biome     | Region              | Study Area | Start Year | Time-span | N Sp | N. Con | No Change | N. Incon | N Data Points | Alt Drivers? | Stat Tests | Citation                                                                                                                                                                                                                          |
|------------------|---------------|-----------|---------------------|------------|------------|-----------|------|--------|-----------|----------|---------------|--------------|------------|-----------------------------------------------------------------------------------------------------------------------------------------------------------------------------------------------------------------------------------|
| <i>ABUNDANCE</i> |               |           |                     |            |            |           |      |        |           |          |               |              |            |                                                                                                                                                                                                                                   |
| Abundance        | Bony fish     | Temperate | North Sea           | 100000     | 1969       | 40        | 2    | 2      | 0         | 0        | 44            | Yes          | No         | van Hal, R., K. Smits and A.D. Rijnsdorp 2010. How climate warming impacts the distribution and abundance of two small flatfish species in the North Sea. <i>Journal of Sea Research</i> 64: 76-84.                               |
| Abundance        | Bony fish     | Temperate | Mediterranean Sea   | 100000     | 1950       | 54        | 1    | 1      | 0         | 0        | 56            | Yes          | No         | Sabates, A., P. Martin, J. Lloret and V. Raya. 2006. Sea warming and fish distribution: the case of the small pelagic fish, <i>Sardinella aurita</i> , in the western Mediterranean. <i>Global Change Biology</i> . 12: 2209-2219 |
| Abundance        | Bony fish     | Temperate | North-east Atlantic | 1000000    | 1987       | 20        | 15   | 8      | 7         | 0        | 43            | Yes          | No         | Hermant, M., J. Lobry, S. Bonhommeau, J. Poulard and O. Le Pape. 2010. Impact of warming on abundance and occurrence of flatfish populations in the Bay of Biscay (France). <i>Journal of Sea Research</i> 64: 45-53              |
| Abundance        | Benthic algae | Temperate | North-east Atlantic | 100000     | 1958       | 46        | 24   | 4      | 7         | 0        | 74            | Yes          | Yes        | Simkanin, C., et al. 2005. Using historical data to detect temporal changes in the abundances of intertidal species on Irish shores. <i>Journal of the Marine Biological Association UK</i> 85: 1329-1340                         |

|           |                         |           |                     |        |      |    |    |   |   |   |    |     |     |                                                                                                                                                                                                     |
|-----------|-------------------------|-----------|---------------------|--------|------|----|----|---|---|---|----|-----|-----|-----------------------------------------------------------------------------------------------------------------------------------------------------------------------------------------------------|
| Abundance | Benthic cnidarians      | Temperate | North-east Atlantic | 100000 | 1958 | 46 | 24 | 0 | 1 | 0 | 70 | Yes | Yes | Simkanin, C., et al.. 2005. Using historical data to detect temporal changes in the abundances of intertidal species on Irish shores. Journal of the Marine Biological Association UK 85: 1329-1340 |
| Abundance | Benthic crustacea       | Temperate | North-east Atlantic | 100000 | 1958 | 46 | 24 | 2 | 1 | 1 | 72 | Yes | Yes | Simkanin, C., et al.. 2005. Using historical data to detect temporal changes in the abundances of intertidal species on Irish shores. Journal of the Marine Biological Association UK 85: 1329-1340 |
| Abundance | Benthic invert. (other) | Temperate | North-east Atlantic | 100000 | 1958 | 46 | 24 | 0 | 1 | 1 | 70 | Yes | Yes | Simkanin, C., et al.. 2005. Using historical data to detect temporal changes in the abundances of intertidal species on Irish shores. Journal of the Marine Biological Association UK 85: 1329-1340 |
| Abundance | Benthic molluscs        | Temperate | North-east Atlantic | 100000 | 1958 | 46 | 24 | 1 | 5 | 0 | 71 | Yes | Yes | Simkanin, C., et al.. 2005. Using historical data to detect temporal changes in the abundances of intertidal species on Irish shores. Journal of the Marine Biological Association UK 85: 1329-1340 |
| Abundance | Benthic crustacea       | Temperate | Mediterranean Sea   | 1      | 1981 | 19 | 2  | 1 | 0 | 0 | 22 | Yes | No  | Chevaldonne, P. and C. Lejeusne 2003. Regional warming-induced species shift in north-west Mediterranean marine caves. Ecology Letters 6:371-379                                                    |
| Abundance | Zooplankton             | Temperate | Mediterranean Sea   | 1      | 1977 | 27 | 2  | 2 | 0 | 0 | 31 | Yes | No  | Chevaldonne, P. and C. Lejeusne 2003. Regional warming-induced species shift in north-west Mediterranean marine caves. Ecology Letters 6:371-379                                                    |
| Abundance | Zooplankton             | Temperate | Mediterranean Sea   | 1      | 1980 | 24 | 2  | 1 | 0 | 0 | 27 | Yes | No  | Chevaldonne, P. and C. Lejeusne 2003. Regional warming-induced species shift in north-west Mediterranean marine caves. Ecology Letters 6:371-379                                                    |
| Abundance | Zooplankton             | Temperate | Mediterranean Sea   | 1      | 1962 | 40 | 2  | 2 | 0 | 0 | 44 | Yes | No  | Chevaldonne, P. and C. Lejeusne 2003. Regional warming-induced species shift in north-west Mediterranean marine caves. Ecology Letters 6:371-379                                                    |
| Abundance | Zooplankton             | Temperate | Mediterranean Sea   | 1      | 1962 | 41 | 2  | 1 | 0 | 0 | 44 | Yes | No  | Chevaldonne, P. and C. Lejeusne 2003. Regional warming-induced species shift in north-west Mediterranean marine caves. Ecology Letters 6:371-379                                                    |
| Abundance | Zooplankton             | Temperate | Mediterranean Sea   | 1      | 1968 | 33 | 2  | 2 | 0 | 0 | 37 | Yes | No  | Chevaldonne, P. and C. Lejeusne 2003. Regional warming-induced species shift in north-west Mediterranean marine caves. Ecology Letters 6:371-379                                                    |
| Abundance | Zooplankton             | Temperate | Mediterranean       | 1      | 1962 | 38 | 2  | 2 | 0 | 0 | 42 | Yes | No  | Chevaldonne, P. and C. Lejeusne 2003. Regional warming-induced species shift in north-west                                                                                                          |



|           |             |             |                    |         |      |    |    |   |    |   |    |     |     |                                                                                                                                                                                                                                                          |
|-----------|-------------|-------------|--------------------|---------|------|----|----|---|----|---|----|-----|-----|----------------------------------------------------------------------------------------------------------------------------------------------------------------------------------------------------------------------------------------------------------|
|           |             |             | Sea                |         |      |    |    |   |    |   |    |     |     | Mediterranean marine caves. Ecology Letters 6:371-379                                                                                                                                                                                                    |
| Abundance | Zooplankton | Temperate   | Mediterranean Sea  | 1       | 1977 | 24 | 2  | 2 | 0  | 0 | 28 | Yes | No  | Chevaldonne, P. and C. Lejeune 2003. Regional warming-induced species shift in north-west Mediterranean marine caves. Ecology Letters 6:371-379                                                                                                          |
| Abundance | Bony fish   | Temperate   | North Sea          | 1000000 | 1963 | 43 | 7  | 1 | 0  | 0 | 51 | Yes | Yes | Kirby, R.R., G. Beaugrand and J.A. Lindley. 2009. Synergistic effects of climate and fishin in a marine ecosystem. Ecosystems 12:548-561                                                                                                                 |
| Abundance | Zooplankton | Temperate   | North Sea          | 1000000 | 1949 | 57 | 7  | 3 | 0  | 0 | 67 | Yes | Yes | Kirby, R.R., G. Beaugrand and J.A. Lindley. 2009. Synergistic effects of climate and fishin in a marine ecosystem. Ecosystems 12:548-561                                                                                                                 |
| Abundance | Zooplankton | Temperate   | North Sea          | 1000000 | 1957 | 49 | 7  | 1 | 0  | 0 | 57 | Yes | Yes | Kirby, R.R., G. Beaugrand and J.A. Lindley. 2009. Synergistic effects of climate and fishin in a marine ecosystem. Ecosystems 12:548-561                                                                                                                 |
| Abundance | Bony fish   | Temperate   | North Sea          | 1000    | 1952 | 44 | 1  | 1 | 0  | 0 | 46 | Yes | No  | Knights, B. 2003. A review of the possible impacts of long-term oceanic and climate changes and fishing mortality on recruitment of anguillid eels of the Northern Hemisphere. The Science of the Total Environment 310: 237-244                         |
| Abundance | Squid       | Subtropical | California Current | 1000000 | 1985 | 22 | 1  | 1 | 0  | 0 | 24 | Yes | No  | Field, J.C., K. Baltz, A.J. Phillips and W.A. Walker. 2007. Range expansion and trophic interactions of the Jumbo Squid <i>Dosidicus gigas</i> , in the Californian Current. Californian Cooperative Oceanic Fisheries Investigations Reports 48:131-146 |
| Abundance | Zooplankton | Temperate   | North Sea          | 100     | 1973 | 29 | 3  | 1 | 0  | 0 | 33 | Yes | No  | Philippart, C. J. M., et al. 2003. Climate-related changes in recruitment of the bivalve <i>Macoma balthica</i> . Limnology and Oceanography 48:2171-2185.                                                                                               |
| Abundance | Bony fish   | Temperate   | North Sea          | 10000   | 1970 | 37 | 34 | 7 | 55 | 1 | 78 | Yes | Yes | Tulp, I., Bolle, L.J. and A.D. Rijnsdorp. 2008. Signals from the shallows: In search of common patterns in long-term trends in Dutch estuarine and coastal fish. Journal of Sea Research. 60: 54-73                                                      |
| Abundance | Bony fish   | Temperate   | North Sea          | 1000    | 1970 | 37 | 34 | 5 | 20 | 2 | 76 | Yes | Yes | Tulp, I., Bolle, L.J. and A.D. Rijnsdorp. 2008. Signals from the shallows: In search of common patterns in long-term trends in Dutch estuarine and coastal fish. Journal of Sea Research. 60: 54-73                                                      |
| Abundance | Non-bony    | Temperate   | North Sea          | 10000   | 1970 | 37 | 34 | 0 | 1  | 0 | 71 | Yes | Yes | Tulp, I., Bolle, L.J. and A.D. Rijnsdorp. 2008. Signals from the shallows: In search of common                                                                                                                                                           |

|           |                   |           |                     |         |      |    |    |    |   |   |     |     |     |                                                                                                                                                                                                                                                                        |                                                                                                      |
|-----------|-------------------|-----------|---------------------|---------|------|----|----|----|---|---|-----|-----|-----|------------------------------------------------------------------------------------------------------------------------------------------------------------------------------------------------------------------------------------------------------------------------|------------------------------------------------------------------------------------------------------|
|           | fish              |           |                     |         |      |    |    |    |   |   |     |     |     |                                                                                                                                                                                                                                                                        | patterns in long-term trends in Dutch estuarine and coastal fish. Journal of Sea Research. 60: 54-73 |
| Abundance | Benthic crustacea | Temperate | North-east Atlantic | 10      | 1955 | 53 | 1  | 1  | 0 | 0 | 55  | No  | No  | O'Riordan, R.M., S. Culloty, J. Davenport and R. McAllen. 2009. Increases in the abundance of the invasive barnacle <i>Austrominius modestus</i> on the Isle of Cumbrae, Scotland. Journal of the Marine Biological Association 2 - Biodiversity Records 2: e91 doi:10 |                                                                                                      |
| Abundance | Bony fish         | Temperate | North Sea           | 1000000 | 1925 | 79 | 2  | 2  | 0 | 0 | 83  | No  | No  | Beare, D.J. et al. 2004. An increase in the abundance of anchovies and sardines in the north-western North Sea since 1995. Global Change Biology 10:1209-1213                                                                                                          |                                                                                                      |
| Abundance | Bony fish         | Temperate | North Sea           | 1000000 | 1925 | 80 | 12 | 12 | 0 | 0 | 104 | Yes | No  | Beare, D.J., et al. 2004. Long-term increases in prevalence of North Sea fishes having southern biogeographic affinities. Marine Ecology Progress Series 284: 269-278                                                                                                  |                                                                                                      |
| Abundance | Bony fish         | Temperate | North Sea           | 100000  | 1925 | 79 | 1  | 1  | 0 | 0 | 81  | Yes | No  | Beare, D.J., F. Burns, E. Jones, K. Peach and D. Reid. 2005. Red mullet migration into the northern North Sea during late winter. Journal of Sea Research 53: 205-212                                                                                                  |                                                                                                      |
| Abundance | Benthic crustacea | Temperate | North Sea           | 100     | 1973 | 30 | 4  | 1  | 0 | 0 | 35  | Yes | No  | Beukema, J.J. and R. Dekker. 2005. Decline of recruitment success in cockles and other bivalves in the Wadden Sea: possible role of climate change, predation on postlarvae and fisheries. Marine Ecology Progress Series 287: 149-167                                 |                                                                                                      |
| Abundance | Benthic molluscs  | Temperate | North Sea           | 100     | 1973 | 30 | 4  | 3  | 0 | 0 | 37  | Yes | Yes | Beukema, J.J. and R. Dekker. 2005. Decline of recruitment success in cockles and other bivalves in the Wadden Sea: possible role of climate change, predation on postlarvae and fisheries. Marine Ecology Progress Series 287: 149-167                                 |                                                                                                      |
| Abundance | Zooplankton       | Temperate | North Sea           | 100     | 1973 | 30 | 4  | 1  | 0 | 0 | 35  | Yes | No  | Beukema, J.J. and R. Dekker. 2005. Decline of recruitment success in cockles and other bivalves in the Wadden Sea: possible role of climate change, predation on postlarvae and fisheries. Marine Ecology Progress Series 287: 149-167                                 |                                                                                                      |
| Abundance | Bony fish         | Temperate | North-east Atlantic | 1000000 | 1985 | 20 | 15 | 11 | 3 | 1 | 46  | Yes | No  | Bjornsson, H. and O.K. Palsson. 2004. Distribution patterns and dynamics of fish stocks under recent climate change in Icelandic waters. ICES CM2004/K:30                                                                                                              |                                                                                                      |
| Abundance | Bony fish         | Temperate | North-east          | 100000  | 1973 | 30 | 1  | 1  | 0 | 0 | 32  | No  | No  | Blanchard, F. and F. Vandermeersch. 2005. Warming and exponential abundance increase of                                                                                                                                                                                |                                                                                                      |

|           |           |             |                     |         |      |    |   |   |   |   |    |     |     |                                                                                                                                                                                                                 |                                                                                                       |
|-----------|-----------|-------------|---------------------|---------|------|----|---|---|---|---|----|-----|-----|-----------------------------------------------------------------------------------------------------------------------------------------------------------------------------------------------------------------|-------------------------------------------------------------------------------------------------------|
|           |           |             | Atlantic            |         |      |    |   |   |   |   |    |     |     |                                                                                                                                                                                                                 | the subtropical fish <i>Capros aper</i> in the Bay of Biscay (1973-2002). C.R. Biologies 328: 505-509 |
| Abundance | Bony fish | Subtropical | North-west Pacific  | 1000000 | 1965 | 37 | 3 | 1 | 0 | 0 | 41 | No  | Yes | Bonhommeau, S. et al. 2008. Impact of climate on eel populations of the Northern Hemisphere. Marine Ecology Progress Series 373: 71-80                                                                          |                                                                                                       |
| Abundance | Bony fish | Temperate   | North-west Atlantic | 1000000 | 1974 | 28 | 3 | 1 | 0 | 0 | 32 | No  | Yes | Bonhommeau, S. et al. 2008. Impact of climate on eel populations of the Northern Hemisphere. Marine Ecology Progress Series 373: 71-80                                                                          |                                                                                                       |
| Abundance | Bony fish | Temperate   | North Sea           | 1000000 | 1960 | 46 | 3 | 1 | 0 | 0 | 50 | No  | Yes | Bonhommeau, S. et al. 2008. Impact of climate on eel populations of the Northern Hemisphere. Marine Ecology Progress Series 373: 71-80                                                                          |                                                                                                       |
| Abundance | Bony fish | Temperate   | North Sea           | 1000    | 1960 | 40 | 1 | 1 | 0 | 0 | 42 | Yes | Yes | Bonhommeau, S., E. Chassot and E. Rivot. 2008. Fluctuations in European eel ( <i>Anguilla anguilla</i> ) recruitment resulting from environmental changes in the Sargasso Sea. Fisheries Oceanography 17: 32-44 |                                                                                                       |
| Abundance | Bony fish | Temperate   | North Sea           | 1000    | 1964 | 42 | 1 | 1 | 0 | 0 | 44 | Yes | Yes | Bonhommeau, S., E. Chassot and E. Rivot. 2008. Fluctuations in European eel ( <i>Anguilla anguilla</i> ) recruitment resulting from environmental changes in the Sargasso Sea. Fisheries Oceanography 17: 32-44 |                                                                                                       |
| Abundance | Bony fish | Temperate   | North-east Atlantic | 1000    | 1960 | 46 | 1 | 1 | 0 | 0 | 48 | Yes | Yes | Bonhommeau, S., E. Chassot and E. Rivot. 2008. Fluctuations in European eel ( <i>Anguilla anguilla</i> ) recruitment resulting from environmental changes in the Sargasso Sea. Fisheries Oceanography 17: 32-44 |                                                                                                       |
| Abundance | Bony fish | Temperate   | North-east Atlantic | 1000    | 1971 | 35 | 1 | 1 | 0 | 0 | 37 | Yes | Yes | Bonhommeau, S., E. Chassot and E. Rivot. 2008. Fluctuations in European eel ( <i>Anguilla anguilla</i> ) recruitment resulting from environmental changes in the Sargasso Sea. Fisheries Oceanography 17: 32-44 |                                                                                                       |
| Abundance | Bony fish | Temperate   | North Sea           | 1000    | 1969 | 37 | 1 | 1 | 0 | 0 | 39 | Yes | Yes | Bonhommeau, S., E. Chassot and E. Rivot. 2008. Fluctuations in European eel ( <i>Anguilla anguilla</i> ) recruitment resulting from environmental changes in the Sargasso Sea. Fisheries Oceanography 17: 32-44 |                                                                                                       |
| Abundance | Bony fish | Temperate   | North Sea           | 1000    | 1960 | 46 | 1 | 1 | 0 | 0 | 48 | Yes | Yes | Bonhommeau, S., E. Chassot and E. Rivot. 2008. Fluctuations in European eel ( <i>Anguilla anguilla</i> ) recruitment resulting from environmental changes in the Sargasso Sea. Fisheries Oceanography 17: 32-44 |                                                                                                       |
| Abundance | Benthic   | Temperate   | North               | 10      | 1974 | 34 | 1 | 1 | 0 | 0 | 36 | Yes | Yes | Campos, J., et al. 2010. Fluctuations of brown                                                                                                                                                                  |                                                                                                       |

|           |                         |             |                     |         |      |    |    |    |   |   |    |     |    |                                                                                                                                                                                                                                                                 |                                                                                                                |
|-----------|-------------------------|-------------|---------------------|---------|------|----|----|----|---|---|----|-----|----|-----------------------------------------------------------------------------------------------------------------------------------------------------------------------------------------------------------------------------------------------------------------|----------------------------------------------------------------------------------------------------------------|
|           | crustacea               |             | Sea                 |         |      |    |    |    |   |   |    |     |    |                                                                                                                                                                                                                                                                 | shrimp Crangon crangon abundance in the western Dutch Wadden Sea. Marine Ecology Progress Series. 405: 203-219 |
| Abundance | Zooplankton             | Temperate   | North-west Atlantic | 1000    | 1951 | 53 | 2  | 1  | 0 | 0 | 56 | No  | No | Costello, J.H, B.K. Sullivan and D.J. Gifford. 2006. A physical-biological interaction underlying variable phenological responses to climate change by coastal zooplankton. Journal of Plankton Research 28:1099-1105                                           |                                                                                                                |
| Abundance | Bony fish               | Temperate   | North-east Atlantic | 1000    | 1981 | 21 | 4  | 4  | 0 | 0 | 29 | No  | No | Desaunay, Y, D. Guerauld, O. Le Pape and J. Poulard. 2006. Changes in occurrence and abundance of northern/southern flatfishes over a 20-year period in a coastal nursery area (Bay of Vilaine) and on the eastern continental shelf of the Bay of Biscay. Scie |                                                                                                                |
| Abundance | Benthic invert. (other) | Temperate   | North-east Atlantic | 1000000 | 1967 | 39 | 2  | 1  | 0 | 0 | 42 | No  | No | Edward, D.A., J.E. Blyth, R. McKee and A. Simon Gilburn. 2007. Change in the distribution of a member of the strand line community: the seaweed fly (Diptera: Coelopidae). Ecological Entomology 32: 741-746                                                    |                                                                                                                |
| Abundance | Benthic invert. (other) | Temperate   | North-east Atlantic | 100000  | 1981 | 25 | 2  | 1  | 0 | 0 | 28 | No  | No | Edward, D.A., J.E. Blyth, R. McKee and A. Simon Gilburn. 2007. Change in the distribution of a member of the strand line community: the seaweed fly (Diptera: Coelopidae). Ecological Entomology 32: 741-746                                                    |                                                                                                                |
| Abundance | Mammals                 | Temperate   | Hudson Bay          | 10000   | 1981 | 20 | 1  | 1  | 0 | 0 | 22 | Yes | No | Ferguson, S.H., I. Stirling and P. McLoughlin. 2005. Climate change and ringed seal (Phoca hispida) recruitment in western Hudson Bay. Marine Mammal Science 21:121-135                                                                                         |                                                                                                                |
| Abundance | Bony fish               | Subtropical | Gulf of Mexico      | 1000    | 1971 | 36 | 17 | 14 | 0 | 3 | 67 | Yes | No | Fodrie, F.J., K.L. Heck, S.P. Powers, W.M. Graham and K.L. Robinson. 2010. Climate-related, decadal-scale assemblage changes of seagrass-associated fishes in the northern Gulf of Mexico. Global Change Biology 16: 48-59                                      |                                                                                                                |
| Abundance | Bony fish               | Temperate   | North-west Atlantic | 1000000 | 1910 | 88 | 1  | 1  | 0 | 0 | 90 | Yes | No | Friedland, K.D., D.G. Reddin, J.R. McMenemy and K.F. Drinkwater. 2003. Multidecadal trends in North American Atlantic salmon (Salmo salar) stocks and climate trends relevant to juvenile survival. Canadian Journal of Fisheries and Aquatic Sciences 60: 563- |                                                                                                                |
| Abundance | Bony fish               | Temperate   | North-east Atlantic | 1000    | 1947 | 58 | 1  | 1  | 0 | 0 | 60 | Yes | No | Friedland, K.D., M.J. Miller and B. Knights. 2007. Oceanic changes in the Sargasso Sea and declines in recruitment of the European eel. ICES                                                                                                                    |                                                                                                                |

|           |                         |           |                     |        |      |    |    |    |    |    |     |     |     |                                                                                                                                                                                             |
|-----------|-------------------------|-----------|---------------------|--------|------|----|----|----|----|----|-----|-----|-----|---------------------------------------------------------------------------------------------------------------------------------------------------------------------------------------------|
|           |                         |           |                     |        |      |    |    |    |    |    |     |     |     | Journal of Marine Science 64: 519-530                                                                                                                                                       |
| Abundance | Bony fish               | Temperate | North-east Atlantic | 1      | 1981 | 22 | 35 | 2  | 11 | 2  | 59  | Yes | Yes | Genner, M.J., et al.. 2004. Regional climatic warming drives long-term community change of British marine fish. Proceedings of the Royal Society of London Series B. 271: 65                |
| Abundance | Bony fish               | Temperate | English Channel     | 1000   | 1913 | 90 | 35 | 7  | 21 | 2  | 132 | Yes | Yes | Genner, M.J., et al.. 2004. Regional climatic warming drives long-term community change of British marine fish. Proceedings of the Royal Society of London Series B. 271: 65                |
| Abundance | Non-bony fish           | Temperate | English Channel     | 1000   | 1913 | 90 | 35 | 1  | 2  | 0  | 126 | Yes | Yes | Genner, M.J., et al.. 2004. Regional climatic warming drives long-term community change of British marine fish. Proceedings of the Royal Society of London Series B. 271: 65                |
| Abundance | Benthic crustacea       | Temperate | North-west Atlantic | 10     | 1959 | 47 | 25 | 4  | 1  | 5  | 76  | Yes | Yes | Collie, J.S, Wood A.D. and Jeffries H.P. 2008 Long-term shifts in the species composition of a coastal fish community. Canadian Journal of Fisheries and Aquatic Sciences. 65: 1352-1365    |
| Abundance | Benthic invert. (other) | Temperate | North-west Atlantic | 10     | 1959 | 47 | 25 | 0  | 0  | 2  | 72  | No  | Yes | Collie, J.S, Wood A.D. and Jeffries H.P. 2008 Long-term shifts in the species composition of a coastal fish community. Canadian Journal of Fisheries and Aquatic Sciences. 65: 1352-1365    |
| Abundance | Bony fish               | Temperate | North-west Atlantic | 10     | 1959 | 47 | 25 | 18 | 5  | 11 | 90  | Yes | Yes | Collie, J.S, Wood A.D. and Jeffries H.P. 2008 Long-term shifts in the species composition of a coastal fish community. Canadian Journal of Fisheries and Aquatic Sciences. 65: 1352-1365    |
| Abundance | Non-bony fish           | Temperate | North-west Atlantic | 10     | 1959 | 47 | 25 | 0  | 0  | 2  | 72  | No  | Yes | Collie, J.S, Wood A.D. and Jeffries H.P. 2008 Long-term shifts in the species composition of a coastal fish community. Canadian Journal of Fisheries and Aquatic Sciences. 65: 1352-1365    |
| Abundance | Squid                   | Temperate | North-west Atlantic | 10     | 1959 | 47 | 25 | 2  | 0  | 0  | 74  | No  | Yes | Collie, J.S, Wood A.D. and Jeffries H.P. 2008 Long-term shifts in the species composition of a coastal fish community. Canadian Journal of Fisheries and Aquatic Sciences. 65: 1352-1365    |
| Abundance | Mammals                 | Polar     | Beaufort Sea        | 100000 | 1985 | 20 | 1  | 1  | 0  | 0  | 22  | Yes | No  | Fischbach, A.S., S.C. Amstrup and D.C. Douglas. 2007. Landward and eastward shift of Alaskan polar bear denning associated with recent sea ice changes. Polar Biology 30:1395-1405          |
| Abundance | Bony fish               | Temperate | North-east Atlantic | 1      | 1906 | 95 | 1  | 0  | 1  | 0  | 96  | Yes | No  | Guisande, C. A.R. Vergara, I. Riveiro and J.M. Cabanas. 2004. Climate change and abundance of the Atlantic-Iberian sardine ( <i>Sardina pilchardus</i> ). Fisheries Oceanography 13: 91-101 |

|           |                   |             |                        |          |      |     |   |   |   |   |     |     |     |                                                                                                                                                                                                                                                    |
|-----------|-------------------|-------------|------------------------|----------|------|-----|---|---|---|---|-----|-----|-----|----------------------------------------------------------------------------------------------------------------------------------------------------------------------------------------------------------------------------------------------------|
| Abundance | Mammals           | Temperate   | Hudson Bay             | 10000000 | 1903 | 103 | 1 | 1 | 0 | 0 | 105 | Yes | No  | Higdon, J.W. and S. H. Ferguson. 2009. Loss of Arctic sea ice causing punctuated change in the sightings of killer whales ( <i>Orcinus orca</i> ) over the past century. <i>Ecological Applications</i> 19: 1365-1375                              |
| Abundance | Larval bony fish  | Temperate   | North-east Atlantic    | 10000000 | 1950 | 56  | 1 | 1 | 0 | 0 | 58  | Yes | No  | Lindley, J.A., R.R. Kirby, D.G. Johns and P.C. Reid. 2006. Exceptional abundance of the snake pipefish ( <i>Entelurus aequoreus</i> ) in the north-eastern Atlantic Ocean. <i>ICES CM</i> 2006/C:06                                                |
| Abundance | Benthic crustacea | Temperate   | North-east Atlantic    | 1        | 1951 | 40  | 3 | 2 | 0 | 0 | 45  | Yes | Yes | Southward, A. J. 1991. Forty years of changes in species composition and population density of barnacles on a rocky shore near Plymouth. <i>Journal of the Marine Biological Association, UK</i> 71:495-513                                        |
| Abundance | Seabirds          | Subtropical | Great Australian Bight | 10       | 1873 | 125 | 1 | 1 | 0 | 0 | 127 | Yes | No  | Bunce, A., F.I. Norman, N. Brothers, and R. Gales. 2002. Long-term trends in the Australasian gannet ( <i>Morus serrator</i> ) population in Australia: the effect of climate change and commercial fisheries. <i>Marine Biology</i> 141: 263-269. |
| Abundance | Seabirds          | Subtropical | Great Australian Bight | 10       | 1966 | 35  | 1 | 1 | 0 | 0 | 37  | Yes | No  | Bunce, A., F.I. Norman, N. Brothers, and R. Gales. 2002. Long-term trends in the Australasian gannet ( <i>Morus serrator</i> ) population in Australia: the effect of climate change and commercial fisheries. <i>Marine Biology</i> 141: 263-269. |
| Abundance | Seabirds          | Temperate   | Great Australian Bight | 10       | 1961 | 37  | 1 | 1 | 0 | 0 | 39  | Yes | No  | Bunce, A., F.I. Norman, N. Brothers, and R. Gales. 2002. Long-term trends in the Australasian gannet ( <i>Morus serrator</i> ) population in Australia: the effect of climate change and commercial fisheries. <i>Marine Biology</i> 141: 263-269. |
| Abundance | Seabirds          | Temperate   | Great Australian Bight | 10       | 1939 | 62  | 1 | 1 | 0 | 0 | 64  | Yes | No  | Bunce, A., F.I. Norman, N. Brothers, and R. Gales. 2002. Long-term trends in the Australasian gannet ( <i>Morus serrator</i> ) population in Australia: the effect of climate change and commercial fisheries. <i>Marine Biology</i> 141: 263-269. |
| Abundance | Seabirds          | Temperate   | Great Australian Bight | 10       | 1947 | 52  | 1 | 1 | 0 | 0 | 54  | Yes | No  | Bunce, A., F.I. Norman, N. Brothers, and R. Gales. 2002. Long-term trends in the Australasian gannet ( <i>Morus serrator</i> ) population in Australia: the effect of climate change and commercial fisheries. <i>Marine Biology</i> 141: 263-     |

|           |                   |             |                     |        |      |    |    |   |   |   |    |     |    |                                                                                                                                                                                                                                                                 |
|-----------|-------------------|-------------|---------------------|--------|------|----|----|---|---|---|----|-----|----|-----------------------------------------------------------------------------------------------------------------------------------------------------------------------------------------------------------------------------------------------------------------|
|           |                   |             |                     |        |      |    |    |   |   |   |    |     |    | 269.                                                                                                                                                                                                                                                            |
| Abundance | Zooplankton       | Temperate   | North Sea           | 1      | 1974 | 21 | 42 | 9 | 0 | 0 | 72 | Yes | No | Greve, W., F. Reiners and J. Nast. 1996. Biocoenotic changes of the zooplankton in the German Bight: the possible effects of eutrophication and climate. ICES Journal of Marine Science. 53: 951-956.                                                           |
| Abundance | Benthic crustacea | Temperate   | North-east Atlantic | 100000 | 1973 | 23 | 7  | 1 | 0 | 0 | 31 | No  | No | Hemery, G., et al. 2008. Detecting the impact of oceano-climatic changes on marine ecosystems using a multivariate index: The case of the Bay of Biscay (North Atlantic-European Ocean). Global Change Biology 14: 27-38                                        |
| Abundance | Bony fish         | Temperate   | North-east Atlantic | 100000 | 1973 | 23 | 7  | 4 | 0 | 0 | 34 | No  | No | Hemery, G., et al. 2008. Detecting the impact of oceano-climatic changes on marine ecosystems using a multivariate index: The case of the Bay of Biscay (North Atlantic-European Ocean). Global Change Biology 14: 27-38                                        |
| Abundance | Mammals           | Temperate   | North-east Atlantic | 100000 | 1976 | 27 | 7  | 1 | 0 | 0 | 35 | No  | No | Hemery, G., et al. 2008. Detecting the impact of oceano-climatic changes on marine ecosystems using a multivariate index: The case of the Bay of Biscay (North Atlantic-European Ocean). Global Change Biology 14: 27-38                                        |
| Abundance | Seabirds          | Temperate   | North-east Atlantic | 100000 | 1976 | 27 | 7  | 1 | 0 | 0 | 35 | No  | No | Hemery, G., et al. 2008. Detecting the impact of oceano-climatic changes on marine ecosystems using a multivariate index: The case of the Bay of Biscay (North Atlantic-European Ocean). Global Change Biology 14: 27-38                                        |
| Abundance | Zooplankton       | Temperate   | Southern Ocean      | 10000  | 1976 | 20 | 2  | 1 | 0 | 0 | 23 | No  | No | Loeb, V., et al. 1997. Effects of sea-ice extent and krill or salp dominance on the Antarctic food web. Nature, 387: 897-900.                                                                                                                                   |
| Abundance | Zooplankton       | Temperate   | Southern Ocean      | 10000  | 1976 | 21 | 2  | 1 | 0 | 0 | 24 | No  | No | Loeb, V., et al. 1997. Effects of sea-ice extent and krill or salp dominance on the Antarctic food web. Nature, 387: 897-900.                                                                                                                                   |
| Abundance | Zooplankton       | Subtropical | Gulf of California  | 100000 | 1951 | 58 | 5  | 0 | 9 | 1 | 63 | No  | No | Ohman MD, Lavaniegos BE, Townsend AW. 2009. Multi-decadal variations in calcareous holozooplankton in the California Current System: Thecosome pteropods, heteropods, and foraminifera. Geophysical Research Letters. VOL. 36, L18608, doi:10.1029/2009GL039901 |
| Abundance | Seabirds          | Temperate   | North-east Pacific  | 100    | 1972 | 23 | 1  | 1 | 0 | 0 | 25 | Yes | No | Veit, R.R., J.A. McGowan, D.G. Ainley, T.R. Wahl and P. Pyle. 1997. Apex marine predator declines ninety percent in association with changing oceanic climate. Global Change Biology                                                                            |

|           |               |             |                     |         |      |    |   |   |   |   |    |     |    |                                                                                                                                                                                                  |
|-----------|---------------|-------------|---------------------|---------|------|----|---|---|---|---|----|-----|----|--------------------------------------------------------------------------------------------------------------------------------------------------------------------------------------------------|
|           |               |             |                     |         |      |    |   |   |   |   |    |     |    | 3:23-28.                                                                                                                                                                                         |
| Abundance | Seabirds      | Polar       | Southern Ocean      | 10      | 1952 | 48 | 7 | 1 | 0 | 0 | 56 | No  | No | Weimerskirch, H., P. Inchausti, C. Guinet and C. Barbraud. 2003. Trends in bird and seal populations as indicators of a system shift in the Southern Ocean. <i>Antarctic Science</i> 15:249-256. |
| Abundance | Seabirds      | Polar       | Southern Ocean      | 10      | 1961 | 39 | 7 | 1 | 0 | 0 | 47 | No  | No | Weimerskirch, H., P. Inchausti, C. Guinet and C. Barbraud. 2003. Trends in bird and seal populations as indicators of a system shift in the Southern Ocean. <i>Antarctic Science</i> 15:249-256. |
| Abundance | Seabirds      | Polar       | Southern Ocean      | 10      | 1964 | 37 | 7 | 1 | 0 | 0 | 45 | No  | No | Weimerskirch, H., P. Inchausti, C. Guinet and C. Barbraud. 2003. Trends in bird and seal populations as indicators of a system shift in the Southern Ocean. <i>Antarctic Science</i> 15:249-256. |
| Abundance | Seabirds      | Subtropical | Southern Ocean      | 10      | 1971 | 25 | 7 | 1 | 0 | 0 | 33 | No  | No | Weimerskirch, H., P. Inchausti, C. Guinet and C. Barbraud. 2003. Trends in bird and seal populations as indicators of a system shift in the Southern Ocean. <i>Antarctic Science</i> 15:249-256. |
| Abundance | Seabirds      | Temperate   | Southern Ocean      | 10      | 1972 | 28 | 7 | 1 | 0 | 0 | 36 | Yes | No | Weimerskirch, H., P. Inchausti, C. Guinet and C. Barbraud. 2003. Trends in bird and seal populations as indicators of a system shift in the Southern Ocean. <i>Antarctic Science</i> 15:249-256. |
| Abundance | Seabirds      | Temperate   | Southern Ocean      | 10      | 1960 | 40 | 7 | 1 | 0 | 0 | 48 | Yes | No | Weimerskirch, H., P. Inchausti, C. Guinet and C. Barbraud. 2003. Trends in bird and seal populations as indicators of a system shift in the Southern Ocean. <i>Antarctic Science</i> 15:249-256. |
| Abundance | Seabirds      | Temperate   | Southern Ocean      | 10      | 1965 | 31 | 7 | 1 | 0 | 0 | 39 | Yes | No | Weimerskirch, H., P. Inchausti, C. Guinet and C. Barbraud. 2003. Trends in bird and seal populations as indicators of a system shift in the Southern Ocean. <i>Antarctic Science</i> 15:249-256. |
| Abundance | Seabirds      | Temperate   | Southern Ocean      | 10      | 1956 | 41 | 7 | 1 | 0 | 0 | 49 | Yes | No | Weimerskirch, H., P. Inchausti, C. Guinet and C. Barbraud. 2003. Trends in bird and seal populations as indicators of a system shift in the Southern Ocean. <i>Antarctic Science</i> 15:249-256. |
| Abundance | Seabirds      | Temperate   | SOUTHERN OCEAN      | 10      | 1976 | 26 | 7 | 1 | 0 | 0 | 34 | Yes | No | Weimerskirch, H., P. Inchausti, C. Guinet and C. Barbraud. 2003. Trends in bird and seal populations as indicators of a system shift in the Southern Ocean. <i>Antarctic Science</i> 15:249-256. |
| Abundance | Phytoplankton | Temperate   | North-east Atlantic | 1E+08   | 1958 | 45 | 1 | 1 | 0 | 0 | 47 | No  | No | Richardson, A.J. and D.S. Schoeman. 2004. Climate impacts on plankton ecosystems in the northeast Atlantic. <i>Science</i> 305:1609-1612                                                         |
| Abundance | Phytoplankton | Temperate   | North-east          | 1000000 | 1948 | 48 | 1 | 2 | 0 | 0 | 51 | Yes | No | Reid, P.C., M. Edwards, H.G. Hunt and A.J. Warner. 1998. Phytoplankton change in the North                                                                                                       |



|           |                   |             |                     |         |      |     |   |   |   |   |     |     |     |                                                                                                                                                                                                           |
|-----------|-------------------|-------------|---------------------|---------|------|-----|---|---|---|---|-----|-----|-----|-----------------------------------------------------------------------------------------------------------------------------------------------------------------------------------------------------------|
|           |                   |             | Atlantic            |         |      |     |   |   |   |   |     |     |     | Atlantic. Nature 391:546                                                                                                                                                                                  |
| Abundance | Phytoplankton     | Temperate   | North Sea           | 1000000 | 1948 | 48  | 1 | 1 | 0 | 0 | 50  | Yes | No  | Reid, P.C., M. Edwards, H.G. Hunt and A.J. Warner. 1998. Phytoplankton change in the North Atlantic. Nature 391:546                                                                                       |
| Abundance | Phytoplankton     | Temperate   | Southern Ocean      | 100000  | 1978 | 29  | 1 | 2 | 0 | 0 | 32  | Yes | No  | Montes-Hugo, M., et al.. 2009. Recent changes in phytoplankton communities associated with rapid regional climate change along the western Antarctic Peninsula. Science 323: 147                          |
| Abundance | Seabirds          | Temperate   | Southern Ocean      | 10      | 1978 | 27  | 3 | 3 | 0 | 0 | 33  | Yes | No  | Forcada, J., P.N. Trathan, K. Reid, E.J. Murphy and J.P. Croxall. 2006. Contrasting population changes in sympatric penguin species in association with climate warming. Global Change Biology 12:411-423 |
| Abundance | Zooplankton       | Subtropical | Southern Ocean      | 10000   | 1740 | 262 | 8 | 8 | 0 | 0 | 278 | Yes | No  | Field, D.B., T.R. Baumgartner, C.D. Charles, V. Ferreira-Bartrina and M.D. Ohman. 2006. Planktonic foraminifera of the Californian current reflect 20th-century warming. Science 311:62-66                |
| Abundance | Zooplankton       | Temperate   | Southern Ocean      | 1000000 | 1926 | 78  | 2 | 2 | 0 | 0 | 82  | Yes | No  | Atkinson, A., V. Siegel, E. Pakhomov and P. Rothery. 2004. Long-term decline in krill stock and increase in salps within the Southern Ocean. Nature 432: 100-103                                          |
| Abundance | Zooplankton       | Temperate   | North-east Atlantic | 10000   | 1958 | 45  | 1 | 1 | 0 | 0 | 47  | No  | No  | Kamenos, N.A. 2010. North Atlantic summers have warmed more than winters since 1353, and the response of marine zooplankton. Proceedings of the National Academy of Science USA. 107: 22442-22447.        |
| Abundance | Larval bony fish  | Temperate   | North-east Atlantic | 1000000 | 1958 | 48  | 1 | 1 | 0 | 0 | 50  | Yes | No  | Kirby, R.R., D.G. Johns and J.A. Lindley. 2006. Fathers in hot water: rising sea temperatures and a Northeastern Atlantic pipefish baby boom. Biology Letters 2: 597-600                                  |
| Abundance | Bony fish         | Temperate   | English Channel     | 1000    | 1911 | 97  | 3 | 1 | 1 | 0 | 101 | Yes | Yes | Genner MJ, et al. 2010. Body size-dependent responses of a marine fish assemblage to climate change and fishing over a century-long scale. Glob Change Biology 16(2): 517-527.                            |
| Abundance | Benthic algae     | Temperate   | Irish Sea           | 1       | 1962 | 41  | 3 | 1 | 0 | 0 | 45  | Yes | No  | Davies, A. J., M. P. Johnson, and C. A. Maggs. 2007. Limpet grazing and loss of Ascophyllum nodosum canopies on decadal time scales. Marine Ecology-Progress Series 339:131-141                           |
| Abundance | Benthic crustacea | Temperate   | Irish Sea           | 1       | 1962 | 41  | 3 | 1 | 0 | 0 | 45  | Yes | No  | Davies, A. J., M. P. Johnson, and C. A. Maggs. 2007. Limpet grazing and loss of Ascophyllum nodosum canopies on decadal time scales. Marine Ecology-Progress Series 339:131-141                           |

|           |                         |             |                     |   |      |    |    |   |   |   |    |     |     |                                                                                                                                                                                                                                                                               |
|-----------|-------------------------|-------------|---------------------|---|------|----|----|---|---|---|----|-----|-----|-------------------------------------------------------------------------------------------------------------------------------------------------------------------------------------------------------------------------------------------------------------------------------|
| Abundance | Benthic molluscs        | Temperate   | Irish Sea           | 1 | 1962 | 41 | 3  | 1 | 0 | 0 | 45 | Yes | No  | Davies, A. J., M. P. Johnson, and C. A. Maggs. 2007. Limpet grazing and loss of <i>Ascophyllum nodosum</i> canopies on decadal time scales. <i>Marine Ecology-Progress Series</i> 339:131-141                                                                                 |
| Abundance | Benthic molluscs        | Temperate   | Irish Sea           | 1 | 1979 | 26 | 3  | 1 | 0 | 0 | 30 | Yes | No  | Davies, A. J., M. P. Johnson, and C. A. Maggs. 2007. Limpet grazing and loss of <i>Ascophyllum nodosum</i> canopies on decadal time scales. <i>Marine Ecology-Progress Series</i> 339:131-141                                                                                 |
| Abundance | Benthic crustacea       | Temperate   | North-east Atlantic | 1 | 1981 | 28 | 13 | 5 | 0 | 0 | 46 | No  | No  | Henderson, P. and D. Bird. 2010. Fish and macrocrustacean communities and their dynamics in the Severn Estuary. <i>Marine Pollution Bulletin</i> 61: 100-114.                                                                                                                 |
| Abundance | Bony fish               | Temperate   | North-east Atlantic | 1 | 1981 | 28 | 13 | 7 | 0 | 0 | 48 | No  | No  | Henderson, P. and D. Bird. 2010. Fish and macrocrustacean communities and their dynamics in the Severn Estuary. <i>Marine Pollution Bulletin</i> 61: 100-114.                                                                                                                 |
| Abundance | Benthic crustacea       | Temperate   | North-east Atlantic | 1 | 1981 | 24 | 1  | 1 | 0 | 0 | 26 | No  | No  | Henderson, P., R. Seaby, and J. Somes. 2006. A 25-year study of climatic and density-dependent population regulation of common shrimp <i>Crangon crangon</i> (Crustacea: Caridea) in the Bristol Channel. <i>Journal of the Marine Biological Association of the UK</i> 86:28 |
| Abundance | Seagrass                | Subtropical | North-west Atlantic | 1 | 1985 | 20 | 2  | 5 | 5 | 0 | 27 | Yes | Yes | Micheli, F., M. J. Bishop, C. H. Peterson, and J. Rivera. 2008. Alteration of seagrass species composition and function over two decades. <i>Ecological Monographs</i> 78:225-244                                                                                             |
| Abundance | Seagrass                | Subtropical | North-west Atlantic | 1 | 1986 | 19 | 2  | 5 | 5 | 0 | 26 | Yes | Yes | Micheli, F., M. J. Bishop, C. H. Peterson, and J. Rivera. 2008. Alteration of seagrass species composition and function over two decades. <i>Ecological Monographs</i> 78:225-244                                                                                             |
| Abundance | Benthic cnidarians      | Subtropical | North-east Pacific  | 1 | 1931 | 66 | 21 | 4 | 0 | 0 | 91 | Yes | Yes | Sagarin, R. D., J. P. Barry, S. E. Gilman, and C. H. Baxter. 1999. Climate-related change in an intertidal community over short and long time scales. <i>Ecological Monographs</i> 69:465-490                                                                                 |
| Abundance | Benthic crustacea       | Subtropical | North-east Pacific  | 1 | 1931 | 66 | 21 | 2 | 0 | 1 | 89 | Yes | Yes | Sagarin, R. D., J. P. Barry, S. E. Gilman, and C. H. Baxter. 1999. Climate-related change in an intertidal community over short and long time scales. <i>Ecological Monographs</i> 69:465-490                                                                                 |
| Abundance | Benthic invert. (other) | Subtropical | North-east Pacific  | 1 | 1931 | 66 | 21 | 1 | 0 | 2 | 88 | Yes | Yes | Sagarin, R. D., J. P. Barry, S. E. Gilman, and C. H. Baxter. 1999. Climate-related change in an intertidal community over short and long time scales. <i>Ecological Monographs</i> 69:465-490                                                                                 |

|           |                  |             |                     |          |      |     |    |   |   |   |     |     |     |                                                                                                                                                                                                                            |
|-----------|------------------|-------------|---------------------|----------|------|-----|----|---|---|---|-----|-----|-----|----------------------------------------------------------------------------------------------------------------------------------------------------------------------------------------------------------------------------|
| Abundance | Benthic mollusks | Subtropical | North-east Pacific  | 1        | 1931 | 66  | 21 | 8 | 0 | 4 | 95  | Yes | Yes | Sagarin, R. D., J. P. Barry, S. E. Gilman, and C. H. Baxter. 1999. Climate-related change in an intertidal community over short and long time scales. <i>Ecological Monographs</i> 69:465-490                              |
| Abundance | Zooplankton      | Temperate   | North Sea           | 1000000  | 1946 | 57  | 1  | 1 | 0 | 0 | 59  | Yes | No  | Kirby, R.R., G. Beaugrand, J.A. Lindley, A.J. Richardson, M. Edwards and P.C. Reid. 2007. Climate effects and benthic-pelagic coupling in the North Sea. <i>Marine Ecology Progress Series</i> . 330:31-38.                |
| Abundance | Phytoplankton    | Subtropical | North-west Atlantic | 1000000  | 1961 | 42  | 1  | 1 | 0 | 0 | 44  | Yes | No  | Reid, C. 2005. Atlantic wide regime shift? <i>Globec International Newsletter</i> October 2005                                                                                                                             |
| Abundance | Phytoplankton    | Temperate   | North-west Atlantic | 1000000  | 1960 | 43  | 1  | 1 | 0 | 0 | 45  | Yes | No  | Reid, C. 2005. Atlantic wide regime shift? <i>Globec International Newsletter</i> October 2005                                                                                                                             |
| Abundance | Turtles          | Subtropical | PACIFIC             | 1        | 1985 | 20  | 1  | 1 | 0 | 0 | 22  | Yes | No  | Chaloupka M., N. Kamezaki and C. Limpus. 2008. Is climate change affecting the population dynamics of the endangered Pacific loggerhead sea turtle? <i>Journal of Experimental Marine Biology and Ecology</i> 356: 136-143 |
| Abundance | Turtles          | Subtropical | PACIFIC             | 1        | 1967 | 38  | 1  | 1 | 0 | 0 | 40  | Yes | No  | Chaloupka M., N. Kamezaki and C. Limpus. 2008. Is climate change affecting the population dynamics of the endangered Pacific loggerhead sea turtle? <i>Journal of Experimental Marine Biology and Ecology</i> 356: 136-143 |
| Abundance | Turtles          | Subtropical | PACIFIC             | 1        | 1977 | 28  | 1  | 1 | 0 | 0 | 30  | Yes | No  | Chaloupka M., N. Kamezaki and C. Limpus. 2008. Is climate change affecting the population dynamics of the endangered Pacific loggerhead sea turtle? <i>Journal of Experimental Marine Biology and Ecology</i> 356: 136-143 |
| Abundance | Turtles          | Subtropical | Pacific Ocean       | 1        | 1954 | 51  | 1  | 1 | 0 | 0 | 53  | Yes | No  | Chaloupka M., N. Kamezaki and C. Limpus. 2008. Is climate change affecting the population dynamics of the endangered Pacific loggerhead sea turtle? <i>Journal of Experimental Marine Biology and Ecology</i> 356: 136-143 |
| Abundance | Zooplankton      | Temperate   | North-east Atlantic | 1000000  | 1958 | 45  | 2  | 1 | 0 | 0 | 48  | Yes | No  | Bonnet et al. 2005. An overview of <i>Calanus helgolandicus</i> ecology in European waters. <i>Progress in Oceanography</i> 65: 1-53                                                                                       |
| Abundance | Phytoplankton    | Polar       | Arctic Ocean        | 10000000 | 1899 | 105 | 1  | 1 | 0 | 0 | 107 | Yes | Yes | Boyce DG, Lewis MR, Worm B. 2010. Global phytoplankton decline over the past century. <i>Nature</i> 466: 591-596.                                                                                                          |
| Abundance | Phytoplankton    | Subtropical | South               | 10000000 | 1956 | 52  | 1  | 1 | 0 | 0 | 54  | Yes | Yes | Boyce DG, Lewis MR, Worm B. 2010. Global                                                                                                                                                                                   |

|           |               |             |                     |          |      |     |   |   |   |   |     |     |     |                                                                                                                                            |
|-----------|---------------|-------------|---------------------|----------|------|-----|---|---|---|---|-----|-----|-----|--------------------------------------------------------------------------------------------------------------------------------------------|
|           | ankton        |             | Pacific             |          |      |     |   |   |   |   |     |     |     | phytoplankton decline over the past century. Nature 466: 591-596.                                                                          |
| Abundance | Phytoplankton | Subtropical | North Pacific       | 10000000 | 1907 | 102 | 1 | 1 | 0 | 0 | 104 | Yes | Yes | Boyce DG, Lewis MR, Worm B. 2010. Global phytoplankton decline over the past century. Nature 466: 591-596.                                 |
| Abundance | Phytoplankton | Subtropical | South Atlantic      | 10000000 | 1911 | 93  | 1 | 1 | 0 | 0 | 95  | Yes | Yes | Boyce DG, Lewis MR, Worm B. 2010. Global phytoplankton decline over the past century. Nature 466: 591-596.                                 |
| Abundance | Phytoplankton | Temperate   | North Atlantic      | 10000000 | 1903 | 104 | 1 | 1 | 0 | 0 | 106 | Yes | Yes | Boyce DG, Lewis MR, Worm B. 2010. Global phytoplankton decline over the past century. Nature 466: 591-596.                                 |
| Abundance | Phytoplankton | Tropical    | Equatorial Pacific  | 10000000 | 1907 | 101 | 1 | 1 | 0 | 0 | 103 | Yes | Yes | Boyce DG, Lewis MR, Worm B. 2010. Global phytoplankton decline over the past century. Nature 466: 591-596.                                 |
| Abundance | Phytoplankton | Tropical    | North Indian        | 10000000 | 1942 | 56  | 1 | 0 | 0 | 1 | 57  | Yes | Yes | Boyce DG, Lewis MR, Worm B. 2010. Global phytoplankton decline over the past century. Nature 466: 591-596.                                 |
| Abundance | Phytoplankton | Tropical    | Equatorial Atlantic | 10000000 | 1911 | 93  | 1 | 1 | 0 | 0 | 95  | Yes | Yes | Boyce DG, Lewis MR, Worm B. 2010. Global phytoplankton decline over the past century. Nature 466: 591-596.                                 |
| Abundance | Phytoplankton | Tropical    | South Indian        | 10000000 | 1936 | 72  | 1 | 0 | 0 | 1 | 73  | Yes | Yes | Boyce DG, Lewis MR, Worm B. 2010. Global phytoplankton decline over the past century. Nature 466: 591-596.                                 |
| Abundance | Seabirds      | Polar       | Southern Ocean      | 10       | 1959 | 39  | 1 | 1 | 0 | 0 | 41  | No  | No  | Croxall, J.P., P.N. Trathan, and E.J. Murphy. 2002. Environmental change and Antarctic seabird populations. Science 297: 1510-1514.        |
| Abundance | Seabirds      | Temperate   | Southern Ocean      | 10       | 1978 | 22  | 1 | 2 | 0 | 0 | 25  | No  | No  | Croxall, J.P., P.N. Trathan, and E.J. Murphy. 2002. Environmental change and Antarctic seabird populations. Science 297: 1510-1514.        |
| Abundance | Seabirds      | Temperate   | Southern Ocean      | 10       | 1976 | 21  | 1 | 1 | 0 | 0 | 23  | No  | No  | Croxall, J.P., P.N. Trathan, and E.J. Murphy. 2002. Environmental change and Antarctic seabird populations. Science 297: 1510-1514.        |
| Abundance | Zooplankton   | Temperate   | North-east Atlantic | 100000   | 1946 | 60  | 1 | 1 | 0 | 0 | 62  | Yes | No  | Gibbons M., A.J. Richardson. 2009. Patterns of Jellyfish Abundance in the North Atlantic. Hydrobiologia 616: 51-65.                        |
| Abundance | Zooplankton   | Temperate   | North-east Atlantic | 1000000  | 1946 | 60  | 1 | 1 | 0 | 0 | 62  | Yes | No  | Gibbons M., A.J. Richardson. 2009. Patterns of Jellyfish Abundance in the North Atlantic. Hydrobiologia 616: 51-65.                        |
| Abundance | Bony fish     | Temperate   | North Sea           | 1000000  | 1925 | 81  | 1 | 0 | 0 | 1 | 82  | Yes | No  | Harris, M.P., et al.. 2006. A major increase in snake pipefish (Entelurus aequoreus) in northern European seas since 2003: potential impli |

|           |                   |             |                     |         |      |    |   |   |   |   |    |     |     |                                                                                                                                                                                                                                                                 |
|-----------|-------------------|-------------|---------------------|---------|------|----|---|---|---|---|----|-----|-----|-----------------------------------------------------------------------------------------------------------------------------------------------------------------------------------------------------------------------------------------------------------------|
| Abundance | Seabirds          | Polar       | Southern Ocean      | 1       | 1984 | 20 | 1 | 1 | 0 | 0 | 22 | Yes | No  | Jenouvrier, S., C. Barbraud and H. Weimerskirch. 2006. Sea ice affects the population dynamics of Adelie penguins in Terre Adelie. <i>Polar Biology</i> 29:413-423.                                                                                             |
| Abundance | Seabirds          | Polar       | Southern Ocean      | 1       | 1962 | 40 | 3 | 1 | 0 | 0 | 44 | No  | No  | Jenouvrier, S., H. Weimerskirch, C. Barbraud, Y.-H. Park and B. Cazelles. 2005. Evidence of a shift in the cyclicity of Antarctic seabird dynamics linked to climate. <i>Proceedings of the Royal Society B</i> 272:887-895.                                    |
| Abundance | Seabirds          | Polar       | Southern Ocean      | 1       | 1963 | 40 | 3 | 1 | 1 | 0 | 44 | No  | No  | Jenouvrier, S., H. Weimerskirch, C. Barbraud, Y.-H. Park and B. Cazelles. 2005. Evidence of a shift in the cyclicity of Antarctic seabird dynamics linked to climate. <i>Proceedings of the Royal Society B</i> 272:887-895.                                    |
| Abundance | Zooplankton       | Temperate   | North Sea           | 1000000 | 1958 | 48 | 4 | 2 | 1 | 1 | 54 | Yes | No  | Kirby R, G. Beaugrand, J.A. Lindley. 2008. Climate-induced effects on the meroplankton and the benthic-pelagic ecology of the North Sea. <i>Limnology and Oceanography</i> 53: 1805-1815.                                                                       |
| Abundance | Seabirds          | Temperate   | North-east Atlantic | 1000    | 1960 | 35 | 1 | 0 | 0 | 1 | 36 | Yes | No  | Munilla, I., C. Diez and A. Velando. 2007. Are edge bird populations doomed to extinction? A retrospective analysis of the common guillemot collapse in Iberia. <i>Biological Conservation</i> 137:359-371.                                                     |
| Abundance | Benthic crustacea | Temperate   | Bering Sea          | 100000  | 1975 | 27 | 2 | 1 | 0 | 0 | 30 | Yes | Yes | Orensanz J., B. Ernst, D.A. Armstrong, P. Stabeno and P. Livingston 2004. Contraction of the geographic range of distribution of snow crab ( <i>Chionoecetes opilio</i> ) in the eastern Bering Sea: An environmental ratchet? <i>CalCOFI Report</i> 45: 65-79. |
| Abundance | Bony fish         | Temperate   | Bering Sea          | 1000000 | 1960 | 41 | 3 | 2 | 0 | 0 | 46 | No  | No  | Overland J.E., P.J. Stabeno. 2004. Is the climate of the Bering Sea warming and affecting the ecosystem? <i>EOS</i> 85: 309-316.                                                                                                                                |
| Abundance | Bony fish         | Temperate   | Bering Sea          | 1000000 | 1975 | 26 | 3 | 1 | 0 | 0 | 30 | No  | No  | Overland J.E., P.J. Stabeno. 2004. Is the climate of the Bering Sea warming and affecting the ecosystem? <i>EOS</i> 85: 309-316.                                                                                                                                |
| Abundance | Seabirds          | Temperate   | South-west Pacific  | 10      | 1936 | 58 | 1 | 1 | 0 | 0 | 60 | Yes | No  | Peacock, L., M. Paulin and J. Darby. 2000. Investigations into climate influence on population dynamics of yellow-eyed penguins <i>Megadyptes antipodes</i> . <i>New Zealand Journal of Zoology</i> 27:317-325.                                                 |
| Abundance | Zooplankton       | Subtropical | California          | 100000  | 1951 | 43 | 1 | 2 | 0 | 0 | 46 | Yes | No  | Roemmich, D. and J. McGowan. 1995. Climatic warming and the decline of zooplankton in the                                                                                                                                                                       |

|           |               |             |                    |         |      |    |    |   |   |   |     |     |    |                                                                                                                                                                                                                                                   |
|-----------|---------------|-------------|--------------------|---------|------|----|----|---|---|---|-----|-----|----|---------------------------------------------------------------------------------------------------------------------------------------------------------------------------------------------------------------------------------------------------|
|           |               |             | Current            |         |      |    |    |   |   |   |     |     |    | California Current. Science 267:1324-1326                                                                                                                                                                                                         |
| Abundance | Bony fish     | Subtropical | North-east Pacific | 100000  | 1983 | 25 | 11 | 1 | 0 | 0 | 37  | Yes | No | Sydeaman, W. Jet al. 2009. Seabirds and climate in the California Current--A synthesis of change. CalCOFI Report 50:82-104.                                                                                                                       |
| Abundance | Zooplankton   | Tropical    | Gulf of Guinea     | 10      | 1969 | 24 | 1  | 1 | 0 | 0 | 26  | Yes | No | Wiafe, G., H.B. Yaquob, M.A. Mensah and C.L.J. Frid. 2008. Impact of climate change on long-term zooplankton biomass in the upwelling region of the Gulf of Guinea. ICES Journal of Marine Science 65: 318-324                                    |
| Abundance | Zooplankton   | Temperate   | Southern Ocean     | 100000  | 1926 | 80 | 1  | 0 | 1 | 0 | 81  | Yes | No | Ward, P., M.P. Meredith, M.J. Whitehouse and P. Rothery. 2008. The summertime plankton community at South Georgia (Southern Ocean): Comparing the historical (1926/1927) and modern (post 1995) records. Progress in Oceanography 78: 241-256     |
| Abundance | Phytoplankton | Temperate   | Mediterranean Sea  | 100000  | 1929 | 77 | 10 | 2 | 0 | 0 | 89  | No  | No | Tunin-Ley, A., F. Ibanez, J-P. Labat, A. Zingone and R. Lemee. 2009. Phytoplankton biodiversity and the NW Mediterranean Sea warming: changes in the dinoflagellate genus Ceratium in the 20th century. Marine Ecology Progress Series 375: 85-99 |
| Abundance | Phytoplankton | Temperate   | Mediterranean Sea  | 100000  | 1908 | 98 | 10 | 2 | 0 | 0 | 110 | No  | No | Tunin-Ley, A., F. Ibanez, J-P. Labat, A. Zingone and R. Lemee. 2009. Phytoplankton biodiversity and the NW Mediterranean Sea warming: changes in the dinoflagellate genus Ceratium in the 20th century. Marine Ecology Progress Series 375: 85-99 |
| Abundance | Bony fish     | Temperate   | Bering Sea         | 1000000 | 1960 | 41 | 4  | 2 | 0 | 0 | 47  | Yes | No | Sinclair, E.H., et al. 2008. Patterns in prey use among fur seals and seabirds in the Pribilof Islands. Deep-Sea Research II 55: 1897-1918                                                                                                        |
| Abundance | Bony fish     | Temperate   | Bering Sea         | 1000000 | 1975 | 26 | 4  | 1 | 0 | 0 | 31  | Yes | No | Sinclair, E.H., et al. 2008. Patterns in prey use among fur seals and seabirds in the Pribilof Islands. Deep-Sea Research II 55: 1897-1918                                                                                                        |
| Abundance | Zooplankton   | Temperate   | Bering Sea         | 1000000 | 1960 | 41 | 4  | 1 | 0 | 0 | 46  | No  | No | Sinclair, E.H., et al. 2008. Patterns in prey use among fur seals and seabirds in the Pribilof Islands. Deep-Sea Research II 55: 1897-1918                                                                                                        |
| Abundance | Seabirds      | Subtropical | Southern Ocean     | 1000000 | 1981 | 27 | 12 | 2 | 2 | 0 | 41  | Yes | No | Peron, C., et l 2010. Interdecadal changes in at-sea distribution and abundance of subantarctic seabirds along a latitudinal gradient in the Southern Indian Ocean. Global Change Biology 16: 189                                                 |
| Abundance | Seabirds      | Temperate   | Southern           | 1000000 | 1981 | 27 | 12 | 4 | 4 | 0 | 43  | Yes | No | Peron, C., et l 2010. Interdecadal changes in at-                                                                                                                                                                                                 |

|           |                   |             |                     |        |      |    |   |   |   |   |    |     |     |                                                                                                                                                                                                                          |
|-----------|-------------------|-------------|---------------------|--------|------|----|---|---|---|---|----|-----|-----|--------------------------------------------------------------------------------------------------------------------------------------------------------------------------------------------------------------------------|
|           |                   |             | n Ocean             |        |      |    |   |   |   |   |    |     |     | sea distribution and abundance of subantarctic seabirds along a latitudinal gradient in the Southern Indian Ocean. <i>Global Change Biology</i> 16: 189                                                                  |
| Abundance | Benthic crustacea | Temperate   | Gulf of Alaska      | 10000  | 1972 | 34 | 2 | 1 | 0 | 0 | 37 | Yes | Yes | Litzow, M.A. and L. Ciannelli. 2007. Oscillating trophic control induces community reorganization in a marine ecosystem. <i>Ecology Letters</i> 10: 1124-1134                                                            |
| Abundance | Bony fish         | Temperate   | Gulf of Alaska      | 10000  | 1972 | 34 | 2 | 1 | 0 | 0 | 37 | Yes | Yes | Litzow, M.A. and L. Ciannelli. 2007. Oscillating trophic control induces community reorganization in a marine ecosystem. <i>Ecology Letters</i> 10: 1124-1134                                                            |
| Abundance | Phytoplankton     | Temperate   | North Sea           | 100000 | 1958 | 45 | 4 | 1 | 2 | 0 | 50 | Yes | No  | Edwards, M., D.G. Johns, S.C. Leterme, E. Svendsen and A.J. Richardson. 2006. Regional climate change and harmful algal blooms in the northeast Atlantic. <i>Limnology and Oceanography</i> 51: 820-829                  |
| Abundance | Phytoplankton     | Temperate   | North Sea           | 100000 | 1981 | 22 | 4 | 1 | 0 | 0 | 27 | Yes | No  | Edwards, M., D.G. Johns, S.C. Leterme, E. Svendsen and A.J. Richardson. 2006. Regional climate change and harmful algal blooms in the northeast Atlantic. <i>Limnology and Oceanography</i> 51: 820-829                  |
| Abundance | Benthic crustacea | Subtropical | East China Sea      | 100000 | 1959 | 47 | 2 | 2 | 0 | 0 | 51 | Yes | No  | Ma, Z., Z. Xu and J. Zhou. 2009. Effect of global warming on the distribution of <i>Lucifer intermedius</i> and <i>L. hanseni</i> (Decapoda) in the Changjiang estuary. <i>Progress in Natural Science</i> 19: 1389-1395 |
| Abundance | Zooplankton       | Subtropical | California Current  | 100000 | 1951 | 47 | 1 | 2 | 0 | 0 | 50 | Yes | No  | Lavaniegos, B.E. and M.D. Ohman. 1998. Hyperiid amphipods as indicators of climate change in the Californian Current. <i>Proceedings of the Fourth International Crustacean Conference</i>                               |
| Abundance | Benthic molluscs  | Temperate   | North Sea           | 1      | 1962 | 45 | 6 | 1 | 0 | 0 | 52 | Yes | No  | Wiltshire, K.H., et al. 2010. Helgoland Roads, North Sea: 45 years of change. <i>Estuaries and Coasts</i> 33:295-310                                                                                                     |
| Abundance | Phytoplankton     | Temperate   | North Sea           | 1      | 1962 | 45 | 6 | 0 | 0 | 1 | 51 | Yes | No  | Wiltshire, K.H., et al. 2010. Helgoland Roads, North Sea: 45 years of change. <i>Estuaries and Coasts</i> 33:295-310                                                                                                     |
| Abundance | Bony fish         | Temperate   | North-west Atlantic | 1E+08  | 1963 | 40 | 4 | 2 | 0 | 0 | 46 | Yes | No  | Beaugrand, G., M. Edwards, K. Brander, C. Luczak and F. Ibanez. 2008. Causes and projections of abrupt climate-driven ecosystem shifts in the North Atlantic. <i>Ecology Letters</i> 11: 1157-1168                       |

|           |                  |             |                     |          |      |     |    |    |    |    |     |     |     |                                                                                                                                                                                                           |
|-----------|------------------|-------------|---------------------|----------|------|-----|----|----|----|----|-----|-----|-----|-----------------------------------------------------------------------------------------------------------------------------------------------------------------------------------------------------------|
| Abundance | Bony fish        | Temperate   | North Sea           | 1E+08    | 1962 | 44  | 4  | 1  | 0  | 0  | 49  | Yes | No  | Beaugrand, G., M. Edwards, K. Brander, C. Luczak and F. Ibanez. 2008. Causes and projections of abrupt climate-driven ecosystem shifts in the North Atlantic. Ecology Letters 11: 1157-1168               |
| Abundance | Bony fish        | Temperate   | North Atlantic      | 1E+08    | 1976 | 25  | 4  | 1  | 0  | 0  | 30  | Yes | No  | Beaugrand, G., M. Edwards, K. Brander, C. Luczak and F. Ibanez. 2008. Causes and projections of abrupt climate-driven ecosystem shifts in the North Atlantic. Ecology Letters 11: 1157-1168               |
| Abundance | Phytoplankton    | Temperate   | North Sea           | 1E+08    | 1958 | 48  | 4  | 1  | 0  | 0  | 53  | Yes | No  | Beaugrand, G., M. Edwards, K. Brander, C. Luczak and F. Ibanez. 2008. Causes and projections of abrupt climate-driven ecosystem shifts in the North Atlantic. Ecology Letters 11: 1157-1168               |
| Abundance | Bony fish        | Temperate   | North Sea           | 1000000  | 1958 | 43  | 7  | 1  | 0  | 0  | 51  | Yes | Yes | Beaugrand, G., K.M. Brander, J.A. Lindley, S. Soussi and P.C. Reid. 2003. Plankton effect on cod recruitment in the North Sea. Nature 426:661-664                                                         |
| Abundance | Zooplankton      | Temperate   | North Sea           | 1000000  | 1958 | 43  | 7  | 4  | 0  | 0  | 54  | No  | No  | Beaugrand, G., K.M. Brander, J.A. Lindley, S. Soussi and P.C. Reid. 2003. Plankton effect on cod recruitment in the North Sea. Nature 426:661-664                                                         |
| Abundance | Zooplankton      | Temperate   | Bering Sea          | 100000   | 1975 | 31  | 1  | 2  | 0  | 0  | 34  | Yes | No  | Brodeur, R.D., et al.. 2008. Rise and fall of jellyfish in the eastern Bering Sea in relation to climate regime shifts. Progress in Oceanography 77: 103-111                                              |
| Abundance | Larval bony fish | Subtropical | North-east Pacific  | 1000000  | 1951 | 52  | 49 | 25 | 0  | 24 | 126 | Yes | Yes | Hsieh, C. H., et al. 2005. A comparison of long-term trends and variability in populations of larvae of exploited and unexploited fishes in the southern California. Progress in Oceanography 67: 160-185 |
| Abundance | Bony fish        | Temperate   | North-east Atlantic | 10000000 | 1960 | 41  | 2  | 1  | 0  | 0  | 44  | Yes | No  | Beaugrand, G. and P.C. Reid. 2003. Long-term changes in phytoplankton, zooplankton and salmon related to climate. Global Change Biology 9:801-817                                                         |
| Abundance | Zooplankton      | Temperate   | North-east Atlantic | 10000000 | 1960 | 41  | 2  | 1  | 0  | 0  | 44  | Yes | No  | Beaugrand, G. and P.C. Reid. 2003. Long-term changes in phytoplankton, zooplankton and salmon related to climate. Global Change Biology 9:801-817                                                         |
| Abundance | Bony fish        | Temperate   | Tasman Sea          | 1000000  | 1880 | 131 | 52 | 23 | 14 | 0  | 206 | Yes | Yes | Last, P.R., et al. 2010. Long-term shifts in abundance and distribution of a temperate fish                                                                                                               |



|           |               |             |                     |         |      |     |    |    |   |    |     |     |     |                                                                                                                                                                                                                                                             |
|-----------|---------------|-------------|---------------------|---------|------|-----|----|----|---|----|-----|-----|-----|-------------------------------------------------------------------------------------------------------------------------------------------------------------------------------------------------------------------------------------------------------------|
|           |               |             |                     |         |      |     |    |    |   |    |     |     |     | fauna: a response to climate change and fishing practices. Global Ecology and Biogeography. Global Ecology and Biogeography 20: 58-72                                                                                                                       |
| Abundance | Bony fish     | Temperate   | Bass Strait         | 1000000 | 1880 | 131 | 52 | 4  | 0 | 0  | 187 | Yes | Yes | Last, P.R., et al. 2010. Long-term shifts in abundance and distribution of a temperate fish fauna: a response to climate change and fishing practices. Global Ecology and Biogeography. Global Ecology and Biogeography 20: 58-72 Ecology and Biogeography. |
| Abundance | Bony fish     | Temperate   | Indian Ocean        | 1000000 | 1880 | 131 | 52 | 1  | 0 | 0  | 184 | Yes | Yes | Last, P.R., et al. 2010. Long-term shifts in abundance and distribution of a temperate fish fauna: a response to climate change and fishing practices. Global Ecology and Biogeography. Global Ecology and Biogeography 20: 58-72                           |
| Abundance | Non-bony fish | Temperate   | Tasman Sea          | 1000000 | 1880 | 131 | 52 | 4  | 5 | 0  | 187 | No  | Yes | Last, P.R., et al. 2010. Long-term shifts in abundance and distribution of a temperate fish fauna: a response to climate change and fishing practices. Global Ecology and Biogeography. Global Ecology and Biogeography 20: 58-72                           |
| Abundance | Non-bony fish | Temperate   | Bass Strait         | 1000000 | 1880 | 131 | 52 | 1  | 0 | 0  | 184 | No  | Yes | Last, P.R., et al. 2010. Long-term shifts in abundance and distribution of a temperate fish fauna: a response to climate change and fishing practices. Global Ecology and Biogeography. Global Ecology and Biogeography 20: 58-72                           |
| Abundance | Bony fish     | Polar       | North-east Atlantic | 1000000 | 1970 | 29  | 8  | 4  | 0 | 0  | 41  | Yes | Yes | Brunel T., Boucher J. 2007. Long-term trends in fish recruitment in the north-east Atlantic related to climate change. Fisheries Oceanography 16: 336-349.                                                                                                  |
| Abundance | Bony fish     | Temperate   | North-east Atlantic | 10000   | 1970 | 29  | 8  | 1  | 0 | 0  | 38  | Yes | Yes | Brunel T., Boucher J. 2007. Long-term trends in fish recruitment in the north-east Atlantic related to climate change. Fisheries Oceanography 16: 336-349.                                                                                                  |
| Abundance | Bony fish     | Temperate   | North-east Atlantic | 1000000 | 1970 | 29  | 8  | 17 | 0 | 3  | 54  | Yes | Yes | Brunel T., Boucher J. 2007. Long-term trends in fish recruitment in the north-east Atlantic related to climate change. Fisheries Oceanography 16: 336-349.                                                                                                  |
| Abundance | Bony fish     | Temperate   | North-east Atlantic | 100000  | 1970 | 29  | 8  | 11 | 1 | 2  | 48  | Yes | Yes | Brunel T., Boucher J. 2007. Long-term trends in fish recruitment in the north-east Atlantic related to climate change. Fisheries Oceanography 16: 336-349.                                                                                                  |
| Abundance | Larval bony   | Subtropical | North-west          | 1000000 | 1951 | 48  | 34 | 16 | 0 | 12 | 98  | Yes | No  | Hsieh, C., H.J. Kim, W. Watson, E. Di Lorenzo and G. Sugihara. 2009. Climate-driven changes in                                                                                                                                                              |

|           |                  |             |                     |         |      |    |    |   |    |   |    |     |    |                                                                                                                                                                                                                                    |                                                                                                                                       |
|-----------|------------------|-------------|---------------------|---------|------|----|----|---|----|---|----|-----|----|------------------------------------------------------------------------------------------------------------------------------------------------------------------------------------------------------------------------------------|---------------------------------------------------------------------------------------------------------------------------------------|
|           | fish             |             | Pacific             |         |      |    |    |   |    |   |    |     |    |                                                                                                                                                                                                                                    | abundance and distribution of larvae of oceanic fishes in the southern Californian region. <i>Global Change Biology</i> 15: 2137-2152 |
| Abundance | Zooplankton      | Temperate   | North Sea           | 1000000 | 1958 | 42 | 3  | 2 | 0  | 0 | 47 | Yes | No | Beaugrand, G. Long-term changes in copepod abundance and diversity in the north-east Atlantic in relation to fluctuations in the hydroclimatic environment. 2003. <i>Fisheries Oceanography</i> 12: 270-283                        |                                                                                                                                       |
| Abundance | Mammals          | Temperate   | North-east Atlantic | 10000   | 1948 | 56 | 18 | 7 | 11 | 1 | 81 | Yes | No | MacLeod, C.D., et al.. 2005. Climate change and the cetacean community of north-west Scotland. <i>Biological Conservation</i> 124: 477-483                                                                                         |                                                                                                                                       |
| Abundance | Benthic molluscs | Subtropical | California Current  | 100     | 1982 | 25 | 2  | 2 | 0  | 0 | 29 | Yes | No | Rogers-Bennett, L. 2007. Is climate change contributing to range reductions and localized extinctions in Northern (Haloitid kamtschatkana) and flat (Haloitid walallensis) abalones? <i>Bulletin of Marine Science</i> 81: 283-293 |                                                                                                                                       |
| Abundance | Bony fish        | Temperate   | Hudson Bay          | 1       | 1981 | 22 | 4  | 3 | 0  | 0 | 29 | Yes | No | Gaston, A.J., K. Woo and M. Hipfner. 2003. Trends in forage fish populations in Northern Hudson Bay since 1981, as determined from the diet of nestling thick-billed murre <i>Uria lomvia</i> . <i>Arctic</i> 56:227-233           |                                                                                                                                       |
| Abundance | Bony fish        | Temperate   | Hudson Bay          | 1       | 1980 | 20 | 4  | 3 | 0  | 0 | 27 | Yes | No | Gaston, A.J., K. Woo and M. Hipfner. 2003. Trends in forage fish populations in Northern Hudson Bay since 1981, as determined from the diet of nestling thick-billed murre <i>Uria lomvia</i> . <i>Arctic</i> 56:227-233           |                                                                                                                                       |
| Abundance | Zooplankton      | Temperate   | Hudson Bay          | 1       | 1981 | 22 | 4  | 0 | 1  | 0 | 26 | No  | No | Gaston, A.J., K. Woo and M. Hipfner. 2003. Trends in forage fish populations in Northern Hudson Bay since 1981, as determined from the diet of nestling thick-billed murre <i>Uria lomvia</i> . <i>Arctic</i> 56:227-233           |                                                                                                                                       |
| Abundance | Seagrass         | Temperate   | North-east Atlantic | 10      | 1932 | 59 | 1  | 1 | 0  | 0 | 61 | Yes | No | Glemarec, M., Y. Le Faou and F. Cuq. 1997. Long-term changes of seagrass beds in the Glénan Archipelago (South Brittany). <i>Oceanologica Acta</i> 20: 217-227                                                                     |                                                                                                                                       |
| Abundance | Larval bony fish | Temperate   | English Channel     | 1       | 1924 | 77 | 1  | 1 | 0  | 0 | 79 | No  | No | Hawkins, S.J., A.J. Southward and M.J. Genner. 2003. Detection of environmental change in a marine ecosystem-evidence from the western English Channel. <i>The Science of the Total Environment</i> 310:245-256                    |                                                                                                                                       |
| Abundance | Zooplankton      | Temperate   | English Channel     | 1       | 1924 | 77 | 2  | 2 | 0  | 0 | 81 | No  | No | Hawkins, S.J., A.J. Southward and M.J. Genner. 2003. Detection of environmental change in a                                                                                                                                        |                                                                                                                                       |

|           |                   |             |                         |         |      |    |    |    |   |   |    |     |     |                                                                                                                                                                                                                                                             |
|-----------|-------------------|-------------|-------------------------|---------|------|----|----|----|---|---|----|-----|-----|-------------------------------------------------------------------------------------------------------------------------------------------------------------------------------------------------------------------------------------------------------------|
|           |                   |             |                         |         |      |    |    |    |   |   |    |     |     | marine ecosystem-evidence from the western English Channel. The Science of the Total Environment 310:245-256                                                                                                                                                |
| Abundance | Bony fish         | Temperate   | North Sea               | 1000000 | 1980 | 20 | 2  | 1  | 1 | 0 | 23 | No  | No  | Hedger, R., et al. 2004. Analysis of the spatial distributions of mature cod ( <i>Gadus morhua</i> ) and haddock ( <i>Melanogrammus aeglefinus</i> ) abundance in the North Sea (1980-1999) using generalised additive models. Fisheries Research 70: 17-25 |
| Abundance | Phytoplankton     | Temperate   | Kattegat                | 10000   | 1979 | 28 | 2  | 2  | 0 | 0 | 32 | Yes | Yes | Henriksen, P. 2009. Long-term changes in phytoplankton in the Kattegat, the Belt Sea, the Sound and the western Baltic Sea. Journal of Sea Research 61: 114-123                                                                                             |
| Abundance | Bony fish         | Temperate   | North Sea               | 1000000 | 1958 | 47 | 11 | 4  | 0 | 0 | 62 | Yes | No  | Kirby, R.R. and G. Beaugrand. 2009. Trophic amplification of climate warming. Proceedings of the Royal Society of London Series B: Biological Sciences 276: 4095-4103                                                                                       |
| Abundance | Phytoplankton     | Temperate   | North Sea               | 1000000 | 1958 | 47 | 11 | 1  | 0 | 0 | 59 | Yes | No  | Kirby, R.R. and G. Beaugrand. 2009. Trophic amplification of climate warming. Proceedings of the Royal Society of London Series B: Biological Sciences 276: 4095-4103                                                                                       |
| Abundance | Zooplankton       | Temperate   | North Sea               | 1000000 | 1958 | 47 | 11 | 7  | 0 | 0 | 65 | Yes | No  | Kirby, R.R. and G. Beaugrand. 2009. Trophic amplification of climate warming. Proceedings of the Royal Society of London Series B: Biological Sciences 276: 4095-4103                                                                                       |
| Abundance | Benthic crustacea | Temperate   | Bering Sea              | 1000000 | 1982 | 25 | 46 | 1  | 0 | 0 | 72 | Yes | No  | Mueter, F.J. and M.A. Litzow. 2008. Sea ice retreat alters the biogeography of the bering sea continental shelf. Ecological Applications 18: 309-302                                                                                                        |
| Abundance | Bony fish         | Temperate   | Bering Sea              | 1000000 | 1982 | 25 | 46 | 1  | 0 | 1 | 72 | Yes | No  | Mueter, F.J. and M.A. Litzow. 2008. Sea ice retreat alters the biogeography of the bering sea continental shelf. Ecological Applications 18: 309-302                                                                                                        |
| Abundance | Bony fish         | Subtropical | South west Indian Ocean | 10      | 1989 | 19 | 23 | 11 | 5 | 5 | 53 | NA  | NA  | Lloyd, P., S. Weeks, M. Magno-Canto, G. Plaganyi and E. Plaganyi. 2010 Ocean warming alters species abundance patterns and increases species richness in an African sub-tropical reef-fish community. Fisheries Oceanography 21: 78-94                      |
| Abundance | Seabirds          | Temperate   | North-east Atlantic     | 100000  | 1986 | 19 | 1  | 1  | 0 | 0 | 21 | No  | No  | Frederiksen, M., M. Edwards, R.A. Mavor and S. Wanless. 2007. Regional and annual variation in black-legged kittiwake breeding productivity is related to sea surface temperature. Marine                                                                   |

|                      |                    |           |                        |         |            |       |   |   |   |   |           |     |     |                                                                                                                                                                                                                                |
|----------------------|--------------------|-----------|------------------------|---------|------------|-------|---|---|---|---|-----------|-----|-----|--------------------------------------------------------------------------------------------------------------------------------------------------------------------------------------------------------------------------------|
|                      |                    |           |                        |         |            |       |   |   |   |   |           |     |     | Ecology Progress Series 350:137-143.                                                                                                                                                                                           |
| Abundance            | Seabirds           | Temperate | North Sea              | 10000   | 1986       | 19    | 1 | 3 | 0 | 1 | 23        | No  | No  | Frederiksen, M., M. Edwards, R.A. Mavor and S. Wanless. 2007. Regional and annual variation in black-legged kittiwake breeding productivity is related to sea surface temperature. Marine Ecology Progress Series 350:137-143. |
| Abundance            | Seabirds           | Temperate | Irish Sea              | 100000  | 1986       | 19    | 1 | 1 | 0 | 0 | 21        | No  | No  | Frederiksen, M., M. Edwards, R.A. Mavor and S. Wanless. 2007. Regional and annual variation in black-legged kittiwake breeding productivity is related to sea surface temperature. Marine Ecology Progress Series 350:137-143. |
| <i>CALCIFICATION</i> |                    |           |                        |         |            |       |   |   |   |   |           |     |     |                                                                                                                                                                                                                                |
| Calcification        | Benthic cnidarians | Tropical  | South-west Pacific     | 10000   | 1900       | 106   | 1 | 1 | 0 | 0 | 108       | Yes | No  | De'ath, G., J. M. Lough and K.E. Fabricius. 2009. Declining coral calcification on the Great Barrier Reef. Science 323: 116-119                                                                                                |
| Calcification        | Benthic cnidarians | Temperate | Tasman Sea             | 1       | 1650       | 343   | 1 | 1 | 0 | 0 | 345       | NA  | NA  | Thresher, R., et al.. 2004. Oceanic evidence of climate change in southern Australia over the last three centuries. Geophysical Research Letters 31 doi:10.1029/2003GL018869                                                   |
| Calcification        | Benthic cnidarians | Tropical  | Red Sea & Gulf of Aden | 1       | 1930       | 81    | 1 | 1 | 0 | 0 | 83        | Yes | No  | Cantin, N.E., A.L. Cohen, K.B. Karnauskas, A.M. Tarrant and D.C. McCorkle. 2010. Ocean warming slows coral growth in the Red Sea. Science 329: 322-325.                                                                        |
| Calcification        | Benthic cnidarians | Tropical  | Caribbean              | 1       | 1860       | 148   | 1 | 0 | 4 | 0 | 149       | NA  | NA  | Carilli J.E., Norris R.D., Black B., Walsh S.M., McField M. 2010. Century-scale records of coral growth rates indicate that local stressors reduce coral thermal tolerance threshold. Global Change Biology 16: 1247-1257.     |
| Calcification        | Zooplankton        | Temperate | Southern Ocean         | 1000000 | -<br>49000 | 51005 | 1 | 1 | 0 | 0 | 510<br>07 | Yes | No  | Moy, A.D., Howard, W.R., Bray, S.G. and T.W. Trull. 2009. Reduced calcification in modern Southern Ocean planktonic foraminifera. Nature Geoscience 2:276-280.                                                                 |
| Calcification        | Zooplankton        | Tropical  | Arabian Sea            | 1       | 1890       | 106   | 1 | 1 | 0 | 0 | 108       | Yes | Yes | de Moel, H., et al.. 2009. Planktic foraminiferal shell thinning in the Arabian Sea due to anthropogenic ocean acidification? Biogeosciences 6: 1917-1925                                                                      |
| Calcification        | Phytoplankton      | Temperate | North Atlantic         | 1       | 1789       | 216   | 1 | 1 | 0 | 0 | 218       | No  | No  | Iglesias-Rodriguez, M.D. et al. 2008. Phytoplankton calcification in a high-CO2 world                                                                                                                                          |
| Calcification        | Phytoplankton      | Temperate | North Atlantic         | 1       | 1789       | 216   | 1 | 2 | 0 | 0 | 219       | Yes | No  | Halloran, P.R., I.R. Hall E. Colmenero-Hidalgo and R.E.M. Rickaby. 2008. Evidence for a multi-species coccolith volume change over the past                                                                                    |

|                         |                    |             |                |         |      |       |   |   |   |   |     |     |     |                                                                                                                                                                                                                |
|-------------------------|--------------------|-------------|----------------|---------|------|-------|---|---|---|---|-----|-----|-----|----------------------------------------------------------------------------------------------------------------------------------------------------------------------------------------------------------------|
|                         |                    |             |                |         |      |       |   |   |   |   |     |     |     | two centuries: understanding a potential ocean acidification response. Biogeosciences 5:1651-1655                                                                                                              |
| Calcification           | Benthic cnidarians | Tropical    | Caribbean      | 1E+08   | 1974 | 32    | 2 | 1 | 0 | 0 | 35  | Yes | No  | Edmunds P.J. 2007. Evidence for a decadal-scale decline in the growth rates of juvenile scleractinian corals. Marine Ecology Progress Series 341: 1-13.                                                        |
| Calcification           | Benthic cnidarians | Tropical    | Pacific Ocean  | 10      | 1974 | 33    | 5 | 2 | 0 | 0 | 40  | Yes | No  | Manzello, D.P. 2010. Coral growth with thermal stress and ocean acidification: lessons from the eastern tropical Pacific. Coral Reefs 29:749-758                                                               |
| Calcification           | Benthic cnidarians | Tropical    | Pacific Ocean  | 10      | 1983 | 24    | 5 | 1 | 0 | 0 | 30  | Yes | No  | Manzello, D.P. 2010. Coral growth with thermal stress and ocean acidification: lessons from the eastern tropical Pacific. Coral Reefs 29:749-758                                                               |
| Calcification           | Benthic cnidarians | Tropical    | Pacific Ocean  | 10      | 1979 | 28    | 5 | 1 | 0 | 1 | 34  | Yes | No  | Manzello, D.P. 2010. Coral growth with thermal stress and ocean acidification: lessons from the eastern tropical Pacific. Coral Reefs 29:749-758                                                               |
| Calcification           | Benthic cnidarians | Tropical    | Indian Ocean   | 1000    | 1984 | 22    | 1 | 8 | 0 | 0 | 31  | Yes | No  | Tanzil, J.T.I., Brown, B.E., Tudhope, A.W., Dunne, R.P. Decline in skeletal growth of the coral <i>Porites lutea</i> from the Andaman Sea, South Thailand between 1984 and 2005. Coral Reefs 28: 519-528.      |
| Calcification           | Benthic cnidarians | Subtropical | North Atlantic | 100     | 1937 | 60    | 1 | 0 | 1 | 0 | 61  | Yes | No  | Helmle, K.P., Dodge, R.E., Swart, P.K., Gledhill, D.K., Eakin, C.M. (2011) Growth rates of Florida corals from 1937 to 1996 and their response to climate change. Nature Communications 2: 215                 |
| <i>COMMUNITY CHANGE</i> |                    |             |                |         |      |       |   |   |   |   |     |     |     |                                                                                                                                                                                                                |
| Community change        | Benthic molluscs   | Temperate   | North Sea      | 1000000 | 1958 | 48    | 7 | 1 | 0 | 0 | 56  | Yes | Yes | Kirby, R.R., G. Beaugrand and J.A. Lindley. 2009. Synergistic effects of climate and fish in a marine ecosystem. Ecosystems 12:548-561                                                                         |
| Community change        | Phytoplankton      | Temperate   | North Sea      | 1000000 | 1949 | 57    | 7 | 1 | 0 | 0 | 65  | Yes | Yes | Kirby, R.R., G. Beaugrand and J.A. Lindley. 2009. Synergistic effects of climate and fish in a marine ecosystem. Ecosystems 12:548-561                                                                         |
| Community change        | Bony fish          | Temperate   | North Sea      | 1000000 | 1985 | 22    | 1 | 1 | 0 | 0 | 24  | Yes | No  | Hiddink, J.G. and R. ter Hofstede. 2008. Climate induced increases in species richness of marine fishes. Global Change Biology 14: 453-460                                                                     |
| Community change        | Bony fish          | Temperate   | Irish Sea      | 1       | 1981 | 25    | 2 | 1 | 0 | 0 | 28  | No  | No  | Henderson, P.A. 2007. Discrete and continuous change in the fish community of the Bristol Channel in response to climate change. Journal of the Marine Biological Association of the United Kingdom 87:589-598 |
| Community               | Benthic            | Temperate   | North-         | 1       | -    | 12001 | 1 | 1 | 0 | 0 | 120 | No  | No  | Warwick R.M., S.M. Turk SM. 2002 Predicting                                                                                                                                                                    |

|                  |                         |             |                     |        |       |     |    |   |   |   |     |     |     |                                                                                                                                                                                                                             |
|------------------|-------------------------|-------------|---------------------|--------|-------|-----|----|---|---|---|-----|-----|-----|-----------------------------------------------------------------------------------------------------------------------------------------------------------------------------------------------------------------------------|
| change           | molluscs                |             | east Atlantic       |        | 10000 |     |    |   |   |   | 03  |     |     | climate change, effects on marine biodiversity: comparison of recent and fossil molluscan death assemblages. Journal of the Marine Biological Association of the United Kingdom, 82:847-850.                                |
| Community change | Bony fish               | Temperate   | Gulf of St Lawrence | 100000 | 1971  | 35  | 1  | 1 | 0 | 0 | 37  | Yes | Yes | Benoit, H.P. and D.P. Swain. 2008. Impacts of environmental change and direct and indirect harvesting effects on the dynamics of a marine fish community. Canadian Journal of Fisheries and Aquatic Sciences. 65: 2088-2104 |
| Community change | Benthic crustacea       | Polar       | Arctic Ocean        | 1000   | 1908  | 100 | 1  | 0 | 1 | 0 | 101 | No  | No  | Berge J, et al. 2009. Changes in the decapod fauna of an Arctic fjord during the last 100 years (1908-2007). Polar Biology 32:953-961                                                                                       |
| Community change | Bony fish               | Subtropical | Gulf of Mexico      | 1000   | 1971  | 36  | 17 | 1 | 0 | 0 | 54  | Yes | No  | Fodrie, F.J., K.L. Heck, S.P. Powers, W.M. Graham and K.L. Robinson. 2010. Climate-related, decadal-scale assemblage changes of seagrass-associated fishes in the northern Gulf of Mexico. Global Change Biology 16: 48-59  |
| Community change | Bony fish               | Temperate   | North-west Atlantic | 10     | 1959  | 47  | 25 | 8 | 0 | 0 | 80  | Yes | Yes | Collie, J.S, Wood A.D. and Jeffries H.P. 2008 Long-term shifts in the species composition of a coastal fish community. Canadian Journal of Fisheries and Aquatic Sciences. 65: 1352-1365                                    |
| Community change | Benthic molluscs        | Temperate   | North-east Atlantic | 1      | 1980  | 27  | 2  | 1 | 0 | 0 | 30  | No  | No  | Hawkins, S. J., et al. 2008. Complex interactions in a rapidly changing world: responses of rocky shore communities to recent climate change. Climate Research 37: 123-133                                                  |
| Community change | Benthic molluscs        | Temperate   | North-east Atlantic | 1      | 1983  | 24  | 2  | 2 | 0 | 0 | 28  | No  | No  | Hawkins, S. J., et al. 2008. Complex interactions in a rapidly changing world: responses of rocky shore communities to recent climate change. Climate Research 37: 123-133                                                  |
| Community change | Bony fish               | Temperate   | North-east Atlantic | 1      | 1981  | 28  | 13 | 1 | 0 | 0 | 42  | No  | No  | Henderson, P. and D. Bird. 2010. Fish and macrocrustacean communities and their dynamics in the Severn Estuary. Marine Pollution Bulletin 61: 100-114.                                                                      |
| Community change | Benthic invert. (other) | Subtropical | North-east Pacific  | 10000  | 1970  | 33  | 2  | 2 | 0 | 0 | 37  | Yes | No  | Smith, J. R., P. Fong, and R. F. Ambrose. 2006. Dramatic declines in mussel bed community diversity: Response to climate change? Ecology 87:1153-1161.                                                                      |
| Community change | Benthic invert. (other) | Temperate   | North-east Pacific  | 1      | 1970  | 33  | 2  | 1 | 0 | 0 | 36  | Yes | No  | Smith, J. R., P. Fong, and R. F. Ambrose. 2006. Dramatic declines in mussel bed community diversity: Response to climate change? Ecology 87:1153-1161.                                                                      |
| Community        | Seabirds                | Subtropical | North-              | 10     | 1975  | 33  | 11 | 1 | 0 | 0 | 45  | Yes | No  | Sydeman, W.J., et al. 2009. Seabirds and climate                                                                                                                                                                            |

|                   |                  |             |                         |         |      |    |    |   |   |   |    |     |    |                                                                                                                                                                                                                                        |                                                                             |
|-------------------|------------------|-------------|-------------------------|---------|------|----|----|---|---|---|----|-----|----|----------------------------------------------------------------------------------------------------------------------------------------------------------------------------------------------------------------------------------------|-----------------------------------------------------------------------------|
| change            |                  |             | east Pacific            |         |      |    |    |   |   |   |    |     |    |                                                                                                                                                                                                                                        | in the California Current--A synthesis of change. CalCOFI Report 50:82-104. |
| Community change  | Zooplankton      | Subtropical | North-east Pacific      | 10      | 1975 | 33 | 11 | 1 | 0 | 0 | 45 | Yes | No | Sydeman, W.J., et al. 2009. Seabirds and climate in the California Current--A synthesis of change. CalCOFI Report 50:82-104                                                                                                            |                                                                             |
| Community change  | Zooplankton      | Temperate   | North Sea               | 1       | 1962 | 45 | 6  | 1 | 0 | 0 | 52 | No  | No | Wiltshire, K.H., et al. 2010. Helgoland Roads, North Sea: 45 years of change. Estuaries and Coasts 33:295-310                                                                                                                          |                                                                             |
| Community change  | Zooplankton      | Temperate   | North Sea               | 1E+08   | 1958 | 48 | 4  | 1 | 0 | 0 | 53 | Yes | No | Beaugrand, G., M. Edwards, K. Brander, C. Luczak and F. Ibanez. 2008. Causes and projections of abrupt climate-driven ecosystem shifts in the North Atlantic. Ecology Letters 11: 1157-1168                                            |                                                                             |
| Community change  | Zooplankton      | Temperate   | North Sea               | 1000000 | 1958 | 42 | 3  | 1 | 0 | 0 | 46 | Yes | No | Beaugrand, G. Long-term changes in copepod abundance and diversity in the north-east Atlantic in relation to fluctuations in the hydroclimatic environment. 2003. Fisheries Oceanography 12: 270-283                                   |                                                                             |
| Community change  | Zooplankton      | Temperate   | North Sea               | 1000000 | 1958 | 47 | 11 | 1 | 0 | 0 | 59 | Yes | No | Kirby, R.R. and G. Beaugrand. 2009. Trophic amplification of climate warming. Proceedings of the Royal Society of London Series B: Biological Sciences 276: 4095-4103                                                                  |                                                                             |
| Community change  | Bony fish        | Temperate   | Bering Sea              | 1000000 | 1982 | 25 | 46 | 1 | 0 | 0 | 72 | Yes | No | Mueter, F.J. and M.A. Litzow. 2008. Sea ice retreat alters the biogeography of the bering sea continental shelf. Ecological Applications 18: 309-302                                                                                   |                                                                             |
| Community change  | Bony fish        | Subtropical | South west Indian Ocean | 10      | 1989 | 19 | 45 | 2 | 0 | 0 | 66 | NA  | NA | Lloyd, P., S. Weeks, M. Magno-Canto, G. Plaganyi and E. Plaganyi. 2010 Ocean warming alters species abundance patterns and increases species richness in an African sub-tropical reef-fish community. Fisheries Oceanography 21: 78-94 |                                                                             |
| <i>DEMOGRAPHY</i> |                  |             |                         |         |      |    |    |   |   |   |    |     |    |                                                                                                                                                                                                                                        |                                                                             |
| Demography        | Benthic molluscs | Temperate   | North Sea               | 100     | 1973 | 29 | 3  | 1 | 0 | 0 | 33 | Yes | No | Philippart, C. J. M., et al. 2003. Climate-related changes in recruitment of the bivalve <i>Macoma balthica</i> . Limnology and Oceanography 48:2171-2185.                                                                             |                                                                             |
| Demography        | Turtles          | Subtropical | North-west Atlantic     | 100     | 1981 | 25 | 1  | 1 | 0 | 0 | 27 | No  | No | Hawkes, L., M. A. C. Broderick, M. H. Godfrey, and B. J. Godley. 2007. Investigating the potential impacts of climate change on a marine turtle population. Global Change Biology 13:923-932.                                          |                                                                             |

|            |                   |             |                     |        |      |    |    |   |   |   |    |     |     |                                                                                                                                                                                                                                                                    |
|------------|-------------------|-------------|---------------------|--------|------|----|----|---|---|---|----|-----|-----|--------------------------------------------------------------------------------------------------------------------------------------------------------------------------------------------------------------------------------------------------------------------|
| Demography | Benthic crustacea | Subtropical | Indian Ocean        | 1000   | 1974 | 32 | 1  | 1 | 0 | 0 | 34 | NA  | NA  | Caputi, N., R. Melville-Smith, S. de Lestang, A. Pearce, and M. Feng. 2010. The effect of climate change on the western rock lobster ( <i>Panulirus cygnus</i> ) fishery of Western Australia. <i>Canadian Journal of Fisheries and Aquatic Sciences</i> 67:85-96. |
| Demography | Bony fish         | Temperate   | North-west Atlantic | 10     | 1959 | 47 | 25 | 2 | 0 | 0 | 74 | Yes | Yes | Collie, J.S, Wood A.D. and Jeffries H.P. 2008 Long-term shifts in the species composition of a coastal fish community. <i>Canadian Journal of Fisheries and Aquatic Sciences</i> . 65: 1352-1365                                                                   |
| Demography | Bony fish         | Temperate   | North Sea           | 100000 | 1970 | 35 | 2  | 2 | 0 | 0 | 39 | NA  | NA  | Teal, L.R., J.J. de Leeuw, H.W. van der Veer and A.D. Rijnsdorp. 2008. Effects of climate change on growth of 0-group sole and plaice. <i>Marine Ecology Progress Series</i> 358:219-230                                                                           |
| Demography | Seabirds          | Polar       | Southern Ocean      | 10     | 1952 | 49 | 1  | 1 | 0 | 0 | 51 | No  | No  | Barbraud, C. and H. Weimerskirch. 2001. Emperor penguins and climate change. <i>Nature</i> 411:183-186.                                                                                                                                                            |
| Demography | Seabirds          | Temperate   | North Sea           | 1      | 1958 | 48 | 1  | 1 | 0 | 0 | 50 | Yes | No  | Lewis, S., D.A. Elston, F. Daunt, B. Cheney and P.M. Thompson. 2009. Effects of extrinsic and intrinsic factors on breeding success in a long lived seabird. <i>Oikos</i> 118:521-528.                                                                             |
| Demography | Seabirds          | Temperate   | Irish Sea           | 10     | 1985 | 21 | 1  | 1 | 0 | 0 | 23 | Yes | Yes | Votier, S.C., et al. 2008. Recruitment and survival of immature seabirds in relation to oil spills and climate variability. <i>Journal of Animal Ecology</i> 77:974-983.                                                                                           |
| Demography | Seabirds          | Subtropical | Indian Ocean        | 10     | 1983 | 24 | 1  | 0 | 1 | 0 | 25 | Yes | Yes | Rivalan, P., C. Barbraud, P. Inchausti and H. Weimerskirch. 2010. Combined impacts of longline fisheries and climate on the persistence of the Amsterdam Albatross <i>Diomedea amsterdamensis</i> . <i>Ibis</i> 152:6-18.                                          |
| Demography | Benthic molluscs  | Polar       | Arctic Ocean        | 1      | 1967 | 32 | 1  | 1 | 0 | 0 | 34 | NA  | NA  | Sejr M.K., M.E. Blicher and S. Rysgaard. 2009. Sea ice cover affects inter-annual and geographic variation in growth of the Arctic cockle <i>Clinocardium ciliatum</i> (Bivalvia) in Greenland. <i>Marine Ecology Progress Series</i> 389:149-158                  |
| Demography | Benthic molluscs  | Polar       | Arctic Ocean        | 1      | 1969 | 33 | 1  | 1 | 0 | 0 | 35 | NA  | NA  | Sejr M.K., M.E. Blicher and S. Rysgaard. 2009. Sea ice cover affects inter-annual and geographic variation in growth of the Arctic cockle <i>Clinocardium ciliatum</i> (Bivalvia) in Greenland. <i>Marine Ecology Progress Series</i> 389:149-158                  |
| Demography | Benthic mollusc   | Polar       | Arctic              | 1      | 1982 | 22 | 1  | 0 | 1 | 0 | 23 | NA  | NA  | Sejr M.K., M.E. Blicher and S. Rysgaard. 2009. Sea ice cover affects inter-annual and geographic                                                                                                                                                                   |



|            |                         |             |                    |         |      |    |    |   |   |   |    |     |    |                                                                                                                                                                                                                                                   |                                                                                                                                                  |
|------------|-------------------------|-------------|--------------------|---------|------|----|----|---|---|---|----|-----|----|---------------------------------------------------------------------------------------------------------------------------------------------------------------------------------------------------------------------------------------------------|--------------------------------------------------------------------------------------------------------------------------------------------------|
|            | s                       |             | Ocean              |         |      |    |    |   |   |   |    |     |    |                                                                                                                                                                                                                                                   | variation in growth of the Arctic cockle <i>Clinocardium ciliatum</i> (Bivalvia) in Greenland. <i>Marine Ecology Progress Series</i> 389:149-158 |
| Demography | Benthic molluscs        | Temperate   | Arctic Ocean       | 1       | 1983 | 25 | 1  | 0 | 1 | 0 | 26 | NA  | NA | Sejr M.K., M.E. Blicher and S. Rysgaard. 2009. Sea ice cover affects inter-annual and geographic variation in growth of the Arctic cockle <i>Clinocardium ciliatum</i> (Bivalvia) in Greenland. <i>Marine Ecology Progress Series</i> 389:149-158 |                                                                                                                                                  |
| Demography | Seabirds                | Subtropical | North-east Pacific | 10      | 1971 | 37 | 11 | 0 | 0 | 1 | 48 | Yes | No | Sydeman, W.J., et al. 2009. Seabirds and climate in the California Current--A synthesis of change. <i>CalCOFI Report</i> 50:82-104.                                                                                                               |                                                                                                                                                  |
| Demography | Seabirds                | Subtropical | North-east Pacific | 10      | 1969 | 28 | 11 | 2 | 0 | 0 | 41 | No  | No | Sydeman, W.J., et al. 2001. Climate change, reproductive performance and diet composition of marine birds in the southern California Current system, 1969-1997. <i>Progress in Oceanography</i> 49:309-329.                                       |                                                                                                                                                  |
| Demography | Seabirds                | Subtropical | North-east Pacific | 10      | 1972 | 26 | 11 | 8 | 0 | 0 | 45 | No  | No | Sydeman, W.J., et al. 2001. Climate change, reproductive performance and diet composition of marine birds in the southern California Current system, 1969-1997. <i>Progress in Oceanography</i> 49:309-329.                                       |                                                                                                                                                  |
| Demography | Zooplankton             | Temperate   | North Sea          | 1000000 | 1958 | 43 | 7  | 1 | 0 | 0 | 51 | NA  | NA | Beaugrand, G., K.M. Brander, J.A. Lindley, S. Soussi and P.C. Reid. 2003. Plankton effect on cod recruitment in the North Sea. <i>Nature</i> 426:661-664                                                                                          |                                                                                                                                                  |
| Demography | Seabirds                | Temperate   | North-west Pacific | 10      | 1975 | 27 | 1  | 1 | 0 | 0 | 29 | No  | No | Gjerdum, C., et al. 2003. Tufted puffin reproduction reveals ocean climate variability. <i>Proceedings of the National Academy of Science</i> 100: 9377-9382                                                                                      |                                                                                                                                                  |
| Demography | Seagrass                | Temperate   | Mediterranean Sea  | 1000    | 1967 | 26 | 1  | 1 | 0 | 0 | 28 | NA  | NA | Marba, N., and C.M. Duarte. 1997. Interannual changes in seagrass ( <i>Posidonia oceanica</i> ) growth and environmental change in the Spanish Mediterranean littoral zone. <i>Limnology and Oceanography</i> . 42(5): 800-810.                   |                                                                                                                                                  |
| Demography | Benthic invert. (other) | Subtropical | Mediterranean Sea  | 100     | 1970 | 37 | 1  | 1 | 0 | 0 | 39 | NA  | NA | Staehli, A., R. Schaerer, K. Hoelzle and G. Ribi. 2008. Temperature induced disease in the starfish <i>Astropecten jonstoni</i> . <i>Journal of the Marine Biological Association</i> 2 - Biodiversity Records                                    |                                                                                                                                                  |
| Demography | Seabirds                | Temperate   | Irish Sea          | 1       | 1965 | 44 | 1  | 1 | 0 | 0 | 46 | NA  | NA | Riou, S., et al. 2011. Recent impact of anthropogenic climate change on a higher marine predator in western Britain. <i>Marine Ecology Progress Series</i> . 422: 105-112                                                                         |                                                                                                                                                  |

|            |                         |             |                     |         |      |     |   |   |   |   |     |    |    |                                                                                                                                                                                                                                                                 |
|------------|-------------------------|-------------|---------------------|---------|------|-----|---|---|---|---|-----|----|----|-----------------------------------------------------------------------------------------------------------------------------------------------------------------------------------------------------------------------------------------------------------------|
| Demography | Benthic algae           | Temperate   | North-west Atlantic | 10      | 1979 | 24  | 1 | 1 | 0 | 0 | 26  | NA | NA | Keser, M., J.T. Swenarton and J.F. Foertch. 2005. Effects of thermal input and climate change on growth of Ascophyllum nodosum (Fucales, Phaeophyceae) in eastern Long Island Sound (USA). <i>Journal of Sea Research</i> 54:211-220                            |
| Demography | Benthic cnidarians      | Tropical    | Pacific Ocean       | 1E+08   | 1979 | 21  | 1 | 1 | 0 | 0 | 23  | NA | NA | Hoegh-Guldberg, O. (1999) Climate Change, coral bleaching and the world's coral reefs. <i>Marine and Freshwater Research</i> 50: 839-866.                                                                                                                       |
| Demography | Benthic cnidarians      | Tropical    | Pacific Ocean       | 1E+08   | 1870 | 121 | 1 | 1 | 0 | 0 | 123 | NA | NA | Glynn, P.W. (1993) Coral reef bleaching: ecological perspectives. <i>Coral Reefs</i> 12: 1-17.                                                                                                                                                                  |
| Demography | Benthic cnidarians      | Tropical    | South-west Pacific  | 1000000 | 1980 | 21  | 1 | 1 | 0 | 0 | 23  | NA | NA | Bellwood, D.R., T.P. Hughes, C. Folke and M. Nystrom. (2004) Confronting the coral reef crisis. <i>Nature</i> 429: 827-833.                                                                                                                                     |
| Demography | Bony fish               | Subtropical | Tasman Sea          | 10      | 1952 | 43  | 1 | 1 | 0 | 0 | 45  | NA | NA | Neuheimer, A.B., Thresher, R.E., Lyle, J.M. and Semmens, J.M. (2011) Tolerance limit for fish growth exceeded by warming waters. <i>Nature Climate Change</i> 1: 110-113                                                                                        |
| Demography | Bony fish               | Subtropical | Tasman Sea          | 10      | 1932 | 69  | 1 | 1 | 0 | 0 | 71  | NA | NA | Neuheimer, A.B., Thresher, R.E., Lyle, J.M. and Semmens, J.M. (2011) Tolerance limit for fish growth exceeded by warming waters. <i>Nature Climate Change</i> 1: 110-113                                                                                        |
| Demography | Bony fish               | Temperate   | Tasman Sea          | 10      | 1924 | 75  | 1 | 1 | 0 | 0 | 77  | NA | NA | Neuheimer, A.B., Thresher, R.E., Lyle, J.M. and Semmens, J.M. (2011) Tolerance limit for fish growth exceeded by warming waters. <i>Nature Climate Change</i> 1: 110-113                                                                                        |
| Demography | Bony fish               | Temperate   | Tasman Sea          | 10      | 1910 | 91  | 1 | 2 | 0 | 0 | 94  | NA | NA | Neuheimer, A.B., Thresher, R.E., Lyle, J.M. and Semmens, J.M. (2011) Tolerance limit for fish growth exceeded by warming waters. <i>Nature Climate Change</i> 1: 110-113                                                                                        |
| Demography | Turtles                 | Subtropical | Mediterranean Sea   | 100     | 1984 | 19  | 1 | 1 | 0 | 0 | 21  | No | No | Mazaris, A. D., A. S. Kallimanis, S. P. Sgardelis, and J. D. Pantis. 2008. Do long-term changes in sea surface temperature at the breeding areas affect the breeding dates and reproduction performance of Mediterranean loggerhead turtles? Implications for c |
| Demography | Benthic invert. (other) | Polar       | Southern Ocean      | 1000    | 1985 | 19  | 1 | 1 | 0 | 0 | 21  | NA | NA | Barnes, D.K.A., K. Webb and K. Linse. 2006. Slow growth of Antarctic Bryozoans increases over 20 years and is anomalously high in 2003. <i>Marine Ecology Progress Series</i> 314:187-195                                                                       |

|                     |                   |             |                     |         |      |     |   |   |   |   |     |     |    |                                                                                                                                                                                                                                                                 |
|---------------------|-------------------|-------------|---------------------|---------|------|-----|---|---|---|---|-----|-----|----|-----------------------------------------------------------------------------------------------------------------------------------------------------------------------------------------------------------------------------------------------------------------|
| Demography          | Seabirds          | Temperate   | North Sea           | 10000   | 1986 | 19  | 1 | 3 | 0 | 1 | 23  | No  | No | Frederiksen, M., M. Edwards, R.A. Mavor and S. Wanless. 2007. Regional and annual variation in black-legged kittiwake breeding productivity is related to sea surface temperature. Marine Ecology Progress Series 350:137-143.                                  |
| Demography          | Seabirds          | Temperate   | Irish Sea           | 100000  | 1986 | 19  | 1 | 1 | 0 | 0 | 21  | No  | No | Frederiksen, M., M. Edwards, R.A. Mavor and S. Wanless. 2007. Regional and annual variation in black-legged kittiwake breeding productivity is related to sea surface temperature. Marine Ecology Progress Series 350:137-143.                                  |
| Demography          | Seabirds          | Temperate   | North-east Atlantic | 100000  | 1986 | 19  | 1 | 1 | 0 | 0 | 21  | No  | No | Frederiksen, M., M. Edwards, R.A. Mavor and S. Wanless. 2007. Regional and annual variation in black-legged kittiwake breeding productivity is related to sea surface temperature. Marine Ecology Progress Series 350:137-143.                                  |
| <i>DISTRIBUTION</i> |                   |             |                     |         |      |     |   |   |   |   |     |     |    |                                                                                                                                                                                                                                                                 |
| Distribution        | Non-bony fish     | Temperate   | Mediterranean Sea   | 10000   | 1870 | 140 | 1 | 1 | 0 | 0 | 142 | No  | No | Francour, P., J.M. Cottalorda, M. Aubert, S. Bava, M. Colombey, P. Gilles, H. Kara, P. Lelong, L. Mangialajo, R. Miniconi and J-P. Quignard 2010 Recent occurrences of Opah, Lampris Guttatus (Actinopterygii, Lampriformes, Lampridae) in the Western Mediterr |
| Distribution        | Bony fish         | Temperate   | North-east Atlantic | 1000000 | 1966 | 30  | 1 | 1 | 0 | 0 | 32  | No  | No | Swaby, S.E. and G.W. Potts 1999. The sailfin dory, a first British record. Journal of Fish Biology 54: 1338-1340                                                                                                                                                |
| Distribution        | Bony fish         | Subtropical | Mediterranean Sea   | 100000  | 1982 | 22  | 1 | 1 | 0 | 0 | 24  | Yes | No | Tsikliras, A.C. 2008. Climate-related geographic shift and sudden population increase of a small pelagic fish (Sardinella aurita) in the eastern Mediterranean Sea. Marine Biology Research 4: 477-481                                                          |
| Distribution        | Bony fish         | Temperate   | North Sea           | 100000  | 1969 | 40  | 2 | 2 | 0 | 0 | 44  | Yes | No | van Hal, R., K. Smits and A.D. Rijnsdorp 2010. How climate warming impacts the distribution and abundance of two small flatfish species in the North Sea. Journal of Sea Research 64: 76-84.                                                                    |
| Distribution        | Bony fish         | Temperate   | Mediterranean Sea   | 100000  | 1950 | 55  | 1 | 1 | 0 | 0 | 57  | Yes | No | Sabates, A., P. Martin, J. Lloret and V. Raya. 2006. Sea warming and fish distribution: the case of the small pelagic fish, Sardinella aurita, in the western Mediterranean. Global Change Biology. 12: 2209-2219                                               |
| Distribution        | Benthic crustacea | Temperate   | North-east Atlantic | 10000   | 1972 | 35  | 2 | 2 | 0 | 0 | 39  | Yes | No | Wetthey, D. S. and S. A. Woodin. 2008. Ecological hindcasting of biogeographic responses to climate change in the European                                                                                                                                      |

|              |                         |             |                     |        |      |    |    |   |   |   |    |     |    |                                                                                                                                                                                                                                                                         |                                                    |
|--------------|-------------------------|-------------|---------------------|--------|------|----|----|---|---|---|----|-----|----|-------------------------------------------------------------------------------------------------------------------------------------------------------------------------------------------------------------------------------------------------------------------------|----------------------------------------------------|
|              |                         |             |                     |        |      |    |    |   |   |   |    |     |    |                                                                                                                                                                                                                                                                         | intertidal zone. <i>Hydrobiologia</i> 606:139-151. |
| Distribution | Benthic invert. (other) | Temperate   | North-east Atlantic | 10000  | 1923 | 84 | 2  | 1 | 0 | 0 | 87 | No  | No | Wetthey, D. S. and S. A. Woodin. 2008. Ecological hindcasting of biogeographic responses to climate change in the European intertidal zone. <i>Hydrobiologia</i> 606:139-151.                                                                                           |                                                    |
| Distribution | Benthic molluscs        | Subtropical | South-east Pacific  | 100000 | 1947 | 54 | 10 | 0 | 1 | 1 | 64 | Yes | No | Rivadeneira, M.M. and Fernandez, M. 2005 Shifts in southern endpoints of distribution in rocky intertidal species along the south-eastern Pacific coast. <i>Journal of Biogeography</i> 32: 203-209                                                                     |                                                    |
| Distribution | Benthic molluscs        | Subtropical | South-east Pacific  | 100000 | 1949 | 52 | 10 | 0 | 1 | 1 | 62 | Yes | No | Rivadeneira, M.M. and Fernandez, M. 2005 Shifts in southern endpoints of distribution in rocky intertidal species along the south-eastern Pacific coast. <i>Journal of Biogeography</i> 32: 203-209                                                                     |                                                    |
| Distribution | Benthic molluscs        | Subtropical | South-east Pacific  | 100000 | 1958 | 43 | 10 | 0 | 1 | 0 | 53 | Yes | No | Rivadeneira, M.M. and Fernandez, M. 2005 Shifts in southern endpoints of distribution in rocky intertidal species along the south-eastern Pacific coast. <i>Journal of Biogeography</i> 32: 203-209                                                                     |                                                    |
| Distribution | Benthic molluscs        | Subtropical | South-east Pacific  | 100000 | 1962 | 39 | 10 | 1 | 1 | 2 | 50 | Yes | No | Rivadeneira, M.M. and Fernandez, M. 2005 Shifts in southern endpoints of distribution in rocky intertidal species along the south-eastern Pacific coast. <i>Journal of Biogeography</i> 32: 203-209                                                                     |                                                    |
| Distribution | Benthic molluscs        | Subtropical | South-east Pacific  | 100000 | 1975 | 26 | 10 | 1 | 1 | 0 | 37 | Yes | No | Rivadeneira, M.M. and Fernandez, M. 2005 Shifts in southern endpoints of distribution in rocky intertidal species along the south-eastern Pacific coast. <i>Journal of Biogeography</i> 32: 203-209                                                                     |                                                    |
| Distribution | Benthic crustacea       | Temperate   | English Channel     | 100000 | 1964 | 38 | 2  | 2 | 0 | 0 | 42 | Yes | No | Herbert, R. J. H., S. J. Hawkins, M. Shearer, and A. J. Southward. 2003. Range extension and reproduction of the barnacle <i>Balanus perforatus</i> in the eastern English Channel. <i>Journal of the Marine Biological Association of the United Kingdom</i> 83:73-82. |                                                    |
| Distribution | Benthic crustacea       | Temperate   | English Channel     | 100000 | 1955 | 47 | 2  | 1 | 0 | 0 | 50 | Yes | No | Herbert, R. J. H., A. J. Southward, M. Shearer, and S. J. Hawkins 2007 Influence of recruitment and temperature on the distribution of intertidal barnacles in the English Channel. <i>Journal of the Marine Biological Association of the United Kingdom</i> 87: 487-  |                                                    |
| Distribution | Benthic crustacea       | Temperate   | English Channel     | 100000 | 1955 | 50 | 2  | 1 | 0 | 0 | 53 | Yes | No | Herbert, R. J. H., A. J. Southward, M. Shearer, and S. J. Hawkins 2007 Influence of recruitment and temperature on the distribution of intertidal barnacles in the English Channel. <i>Journal of the Marine Biological Association of the United Kingdom</i> 87: 487-  |                                                    |

|              |                  |             |                     |         |      |    |    |    |   |    |    |     |     |                                                                                                                                                                                                                                                                              |
|--------------|------------------|-------------|---------------------|---------|------|----|----|----|---|----|----|-----|-----|------------------------------------------------------------------------------------------------------------------------------------------------------------------------------------------------------------------------------------------------------------------------------|
|              |                  |             |                     |         |      |    |    |    |   |    |    |     |     | Kingdom 87: 487-                                                                                                                                                                                                                                                             |
| Distribution | Benthic algae    | Subtropical | North-east Atlantic | 10000   | 1960 | 47 | 37 | 10 | 8 | 10 | 94 | Yes | No  | Lima, F. P., P. A. Ribeiro, N. Queiroz, S. J. Hawkins, and A. M. Santos. 2007. Do distributional shifts of northern and southern species of algae match the warming pattern? <i>Global Change Biology</i> 13: 2592-2605.                                                     |
| Distribution | Benthic algae    | Temperate   | North-east Atlantic | 10000   | 1960 | 47 | 37 | 4  | 1 | 4  | 88 | Yes | No  | Lima, F. P., P. A. Ribeiro, N. Queiroz, S. J. Hawkins, and A. M. Santos. 2007. Do distributional shifts of northern and southern species of algae match the warming pattern? <i>Global Change Biology</i> 13: 2592-2605.                                                     |
| Distribution | Benthic molluscs | Subtropical | North-east Atlantic | 1000    | 1955 | 51 | 1  | 1  | 0 | 0  | 53 | Yes | Yes | Lima, F. P., N. Queiroz, P. A. Ribeiro, S. J. Hawkins, and A. M. Santos. 2006. Recent changes in the distribution of a marine gastropod, <i>Patella rustica</i> Linnaeus, 1758, and their relationship to unusual climatic events. <i>Journal of Biogeography</i> 33:812-822 |
| Distribution | Benthic molluscs | Temperate   | North-east Atlantic | 1000    | 1955 | 51 | 1  | 1  | 0 | 0  | 53 | Yes | Yes | Lima, F. P., N. Queiroz, P. A. Ribeiro, S. J. Hawkins, and A. M. Santos. 2006. Recent changes in the distribution of a marine gastropod, <i>Patella rustica</i> Linnaeus, 1758, and their relationship to unusual climatic events. <i>Journal of Biogeography</i> 33:812-822 |
| Distribution | Bony fish        | Temperate   | North Sea           | 1000000 | 1980 | 25 | 28 | 24 | 0 | 0  | 77 | Yes | Yes | Dulvy, N.K., S.I. Rogers, S. Jennings, V. Stelzenmuller, S.R. Dye and H.R. Skjoldal. 2008. Climate change and deepening of the North Sea fish assemblage: a biotic indicator of warming seas. <i>Journal of Applied Ecology</i> 45:1029-1039.                                |
| Distribution | Non-bony fish    | Temperate   | North Sea           | 1000000 | 1980 | 25 | 28 | 4  | 0 | 0  | 57 | Yes | Yes | Dulvy, N.K., S.I. Rogers, S. Jennings, V. Stelzenmuller, S.R. Dye and H.R. Skjoldal. 2008. Climate change and deepening of the North Sea fish assemblage: a biotic indicator of warming seas. <i>Journal of Applied Ecology</i> 45:1029-1039.                                |
| Distribution | Squid            | Subtropical | California Current  | 1000000 | 1985 | 22 | 1  | 1  | 0 | 0  | 24 | Yes | No  | Field, J.C., K. Baltz, A.J. Phillips and W.A. Walker. 2007. Range expansion and trophic interactions of the Jumbo Squid <i>Dosidicus gigas</i> , in the Californian Current. <i>Californian Cooperative Oceanic Fisheries Investigations Reports</i> 48:131-146              |
| Distribution | Benthic algae    | Temperate   | North-east Pacific  | 1       | 1978 | 32 | 1  | 1  | 0 | 0  | 34 | Yes | No  | Harley, C.D.G. and R.T. Paine. 2009. Contingencies and compounded rare perturbations dictate sudden distributional shifts during periods                                                                                                                                     |

|              |                  |             |                     |          |      |     |    |    |    |   |     |     |     |                                                                                                                                                                                                                                                  |                                                                                                                         |
|--------------|------------------|-------------|---------------------|----------|------|-----|----|----|----|---|-----|-----|-----|--------------------------------------------------------------------------------------------------------------------------------------------------------------------------------------------------------------------------------------------------|-------------------------------------------------------------------------------------------------------------------------|
|              |                  |             |                     |          |      |     |    |    |    |   |     |     |     |                                                                                                                                                                                                                                                  | of gradual climate change. Proceedings of the National Academy of Science of the United States of America 106: 11172-11 |
| Distribution | Bony fish        | Temperate   | North-west Atlantic | 1000000  | 1968 | 40  | 30 | 32 | 27 | 5 | 102 | Yes | No  | Nye, J.A., J.S. Link, J.A. Hare and W.J. Overholtz. 2009. Changing spatial distribution of fish stocks in relation to climate and population size on the Northeast United States continental shelf. Marine Ecology Progress Series. 393: 111-129 |                                                                                                                         |
| Distribution | Non-bony fish    | Temperate   | North-west Atlantic | 1000000  | 1968 | 40  | 30 | 3  | 4  | 2 | 73  | Yes | No  | Nye, J.A., J.S. Link, J.A. Hare and W.J. Overholtz. 2009. Changing spatial distribution of fish stocks in relation to climate and population size on the Northeast United States continental shelf. Marine Ecology Progress Series. 393: 111-129 |                                                                                                                         |
| Distribution | Benthic molluscs | Temperate   | North-east Atlantic | 1000     | 1960 | 48  | 1  | 1  | 0  | 0 | 50  | No  | No  | Beukema, J.J., Dekker, R., Jansen, J.M. 2009. Some like it cold: populations of the tellinid bivalve <i>Macoma balthica</i> (L.) suffer in various ways from a warming climate. Marine Ecology Progress Series 384: 135-145                      |                                                                                                                         |
| Distribution | Bony fish        | Temperate   | North-east Atlantic | 1000000  | 1967 | 39  | 2  | 1  | 0  | 0 | 42  | No  | No  | Dufour, F., H. Arrizabalaga, X. Irigoien and J. Santiago. 2010. Climate impacts on albacore and bluefin tunas migrations phenology and spatial distribution. Progress in Oceanography 86: 283-290                                                |                                                                                                                         |
| Distribution | Bony fish        | Subtropical | Mediterranean Sea   | 10000000 | 1900 | 107 | 3  | 1  | 0  | 0 | 111 | Yes | No  | Ben Rais Lasram, F. and D. Mouillot. 2009. Increasing southern invasion enhances congruence between endemic and exotic Mediterranean fish fauna. Biological Invasions 11:697-711                                                                 |                                                                                                                         |
| Distribution | Benthic molluscs | Temperate   | North Sea           | 100      | 1973 | 30  | 4  | 3  | 0  | 0 | 37  | Yes | Yes | Beukema, J.J. and R. Dekker. 2005. Decline of recruitment success in cockles and other bivalves in the Wadden Sea: possible role of climate change, predation on postlarvae and fisheries. Marine Ecology Progress Series 287: 149-167           |                                                                                                                         |
| Distribution | Bony fish        | Subtropical | North-east Atlantic | 1000     | 1980 | 22  | 12 | 10 | 0  | 2 | 44  | Yes | No  | Brander, K., et al.. 2003. Changes in fish distribution in the eastern North Atlantic: Are we seeing a coherent response to a changing temperature?                                                                                              |                                                                                                                         |
| Distribution | Phytoplankton    | Temperate   | Southern Ocean      | 100000   | 1983 | 24  | 1  | 1  | 0  | 0 | 26  | No  | No  | Cubillos, J. et al. 2007. Calcification morphotypes of the coccolithophorid <i>Emiliania huxleyi</i> in the Southern Ocean: changes in 2001 to 2006                                                                                              |                                                                                                                         |

|              |                         |             |                     |          |      |     |   |   |   |   |     |     |     |                                                                                                                                                                                                                                                                        |
|--------------|-------------------------|-------------|---------------------|----------|------|-----|---|---|---|---|-----|-----|-----|------------------------------------------------------------------------------------------------------------------------------------------------------------------------------------------------------------------------------------------------------------------------|
|              |                         |             |                     |          |      |     |   |   |   |   |     |     |     | compared to history                                                                                                                                                                                                                                                    |
| Distribution | Benthic crustacea       | Subtropical | North-east Pacific  | 1000     | 1970 | 27  | 1 | 1 | 0 | 0 | 29  | Yes | Yes | Dawson, M. N., R. K. Grosberg, Y. E. Stuart, and E. Sanford. 2010. Population genetic analysis of a recent range expansion: mechanisms regulating the poleward range limit in the volcano barnacle <i>Tetraclita rubescens</i> . <i>Molecular Ecology</i> 19:1585-1605 |
| Distribution | Benthic invert. (other) | Temperate   | North-east Atlantic | 1000000  | 1967 | 39  | 2 | 1 | 0 | 0 | 42  | No  | No  | Edward, D.A., J.E. Blyth, R. McKee and A. Simon Gilburn. 2007. Change in the distribution of a member of the strand line community: the seaweed fly (Diptera: Coelopidae). <i>Ecological Entomology</i> 32: 741-746                                                    |
| Distribution | Mammals                 | Polar       | Beaufort Sea        | 100000   | 1985 | 20  | 1 | 1 | 0 | 0 | 22  | Yes | No  | Fischbach, A.S., S.C. Amstrup and D.C. Douglas. 2007. Landward and eastward shift of Alaskan polar bear denning associated with recent sea ice changes. <i>Polar Biology</i> 30:1395-1405                                                                              |
| Distribution | Mammals                 | Temperate   | Hudson Bay          | 10000000 | 1903 | 103 | 1 | 1 | 0 | 0 | 105 | Yes | No  | Higdon, J.W. and S. H. Ferguson. 2009. Loss of Arctic sea ice causing punctuated change in the sightings of killer whales ( <i>Orcinus orca</i> ) over the past century. <i>Ecological Applications</i> 19: 1365-1375                                                  |
| Distribution | Benthic algae           | Temperate   | English Channel     | 100000   | 1936 | 68  | 5 | 1 | 0 | 0 | 74  | Yes | No  | Mieszkowska, N., et al.. 2006. Changes in the range of some common rocky shore species in Britain - a response to climate change? <i>Hydrobiologia</i> 555:241-251.                                                                                                    |
| Distribution | Benthic crustacea       | Temperate   | English Channel     | 100000   | 1936 | 68  | 5 | 1 | 0 | 0 | 74  | Yes | No  | Mieszkowska, N., et al.. 2006. Changes in the range of some common rocky shore species in Britain - a response to climate change? <i>Hydrobiologia</i> 555:241-251.                                                                                                    |
| Distribution | Benthic invert. (other) | Temperate   | English Channel     | 100000   | 1954 | 50  | 5 | 1 | 0 | 0 | 56  | Yes | No  | Mieszkowska, N., et al.. 2006. Changes in the range of some common rocky shore species in Britain - a response to climate change? <i>Hydrobiologia</i> 555:241-251.                                                                                                    |
| Distribution | Benthic molluscs        | Temperate   | English Channel     | 100000   | 1952 | 52  | 5 | 1 | 0 | 0 | 58  | Yes | No  | Mieszkowska, N., et al.. 2006. Changes in the range of some common rocky shore species in Britain - a response to climate change? <i>Hydrobiologia</i> 555:241-251.                                                                                                    |
| Distribution | Benthic molluscs        | Temperate   | North Sea           | 100000   | 1952 | 52  | 5 | 1 | 0 | 0 | 58  | Yes | No  | Mieszkowska, N., et al.. 2006. Changes in the range of some common rocky shore species in Britain - a response to climate change? <i>Hydrobiologia</i> 555:241-251..                                                                                                   |
| Distribution | Seabirds                | Subtropical | South-              | 1000000  | 1970 | 37  | 2 | 1 | 0 | 0 | 40  | Yes | No  | Crawford, R.J.M. et al. 2008. Recent                                                                                                                                                                                                                                   |

|              |                         |             |                     |         |      |    |    |   |   |   |    |     |     |  |                                                                                                                                                                                                                                       |
|--------------|-------------------------|-------------|---------------------|---------|------|----|----|---|---|---|----|-----|-----|--|---------------------------------------------------------------------------------------------------------------------------------------------------------------------------------------------------------------------------------------|
|              |                         |             | east Atlantic       |         |      |    |    |   |   |   |    |     |     |  | distributional changes of seabirds in South Africa: is climate having an impact? African Journal of Marine Science 30: 189-193.                                                                                                       |
| Distribution | Seabirds                | Subtropical | South-east Atlantic | 1000000 | 1987 | 20 | 2  | 1 | 0 | 0 | 23 | Yes | No  |  | Crawford, R.J.M. et al. 2008. Recent distributional changes of seabirds in South Africa: is climate having an impact? African Journal of Marine Science 30: 189-193.                                                                  |
| Distribution | Zooplankton             | Temperate   | North Sea           | 1000000 | 1948 | 57 | 1  | 1 | 0 | 0 | 59 | Yes | No  |  | Johns, D.G., M. Edwards, W. Greve and A.W.G.S. John. 2005. Increasing prevalence of the marine cladoceran <i>Penilia avirostris</i> (Dana, 1852) in the North Sea. Helgolands Marine Research 59: 214-218                             |
| Distribution | Benthic cnidarians      | Temperate   | English Channel     | 100     | 1958 | 49 | 23 | 0 | 1 | 0 | 72 | Yes | No  |  | Hinz, H., E. Capasso, M. Lilley, M. Frost, and S. R. Jenkins. 2011. Temporal differences across a bio-geographical boundary reveal slow response of sub-littoral benthos to climate change. Marine Ecology Progress Series 423: 69-82 |
| Distribution | Benthic crustacea       | Temperate   | English Channel     | 100     | 1958 | 49 | 23 | 1 | 0 | 3 | 73 | Yes | No  |  | Hinz, H., E. Capasso, M. Lilley, M. Frost, and S. R. Jenkins. 2011. Temporal differences across a bio-geographical boundary reveal slow response of sub-littoral benthos to climate change. Marine Ecology Progress Series 423: 69-82 |
| Distribution | Benthic invert. (other) | Temperate   | English Channel     | 100     | 1958 | 49 | 23 | 0 | 3 | 0 | 72 | Yes | No  |  | Hinz, H., E. Capasso, M. Lilley, M. Frost, and S. R. Jenkins. 2011. Temporal differences across a bio-geographical boundary reveal slow response of sub-littoral benthos to climate change. Marine Ecology Progress Series 423: 69-82 |
| Distribution | Benthic molluscs        | Temperate   | English Channel     | 100     | 1958 | 49 | 23 | 5 | 5 | 5 | 77 | Yes | No  |  | Hinz, H., E. Capasso, M. Lilley, M. Frost, and S. R. Jenkins. 2011. Temporal differences across a bio-geographical boundary reveal slow response of sub-littoral benthos to climate change. Marine Ecology Progress Series 423: 69-82 |
| Distribution | Benthic invert. (other) | Temperate   | Bass Strait         | 1000    | 1960 | 46 | 1  | 1 | 0 | 0 | 48 | No  | No  |  | Ling, S. D., C. R. Johnson, K. Ridgway, A. J. Hobday, and M. Haddon. 2009. Climate-driven range extension of a sea urchin: inferring future trends by analysis of recent population dynamics. Global Change Biology 15:719-731.       |
| Distribution | Benthic molluscs        | Subtropical | North-east Pacific  | 100     | 1966 | 31 | 21 | 1 | 0 | 0 | 53 | No  | Yes |  | Sagarin, R. D., J. P. Barry, S. E. Gilman, and C. H. Baxter. 1999. Climate-related change in an intertidal community over short and long time scales. Ecological Monographs 69:465-490                                                |
| Distribution | Benthic                 | Temperate   | North-              | 100     | 1954 | 40 | 21 | 1 | 0 | 0 | 62 | No  | Yes |  | Sagarin, R. D., J. P. Barry, S. E. Gilman, and C.                                                                                                                                                                                     |



|              |                   |           |                     |         |      |    |    |    |    |   |     |     |     |                                                                                                                                                                                                                                                                          |
|--------------|-------------------|-----------|---------------------|---------|------|----|----|----|----|---|-----|-----|-----|--------------------------------------------------------------------------------------------------------------------------------------------------------------------------------------------------------------------------------------------------------------------------|
|              | molluscs          |           | east Pacific        |         |      |    |    |    |    |   |     |     |     | H. Baxter. 1999. Climate-related change in an intertidal community over short and long time scales. <i>Ecological Monographs</i> 69:465-490                                                                                                                              |
| Distribution | Benthic crustacea | Polar     | Chukchi Sea         | 10000   | 1933 | 72 | 3  | 2  | 0  | 0 | 77  | No  | No  | Sirenko B.I. and S.Y. Gagaev. 2007. Unusual abundance of macrobenthos and biological invasions in the Chukchi Sea. <i>Russian Journal of Marine Biology</i> 33: 355-364.                                                                                                 |
| Distribution | Benthic molluscs  | Polar     | Chukchi Sea         | 10000   | 1933 | 72 | 3  | 1  | 0  | 0 | 76  | No  | No  | Sirenko B.I. and S.Y. Gagaev. 2007. Unusual abundance of macrobenthos and biological invasions in the Chukchi Sea. <i>Russian Journal of Marine Biology</i> 33: 355-364.                                                                                                 |
| Distribution | Bony fish         | Temperate | North Sea           | 1000000 | 1977 | 25 | 36 | 30 | 30 | 4 | 91  | Yes | No  | Perry, A. L., P. J. Low, J. R. Ellis and J. D. Reynolds. 2005. Climate change and distribution shifts in marine fishes. <i>Science</i> . 308: 1912:1915                                                                                                                  |
| Distribution | Non-bony fish     | Temperate | North Sea           | 1000000 | 1977 | 25 | 36 | 1  | 6  | 1 | 62  | Yes | No  | Perry, A. L., P. J. Low, J. R. Ellis and J. D. Reynolds. 2005. Climate change and distribution shifts in marine fishes. <i>Science</i> . 308: 1912:1915                                                                                                                  |
| Distribution | Zooplankton       | Temperate | North-east Atlantic | 1000000 | 1958 | 45 | 2  | 2  | 0  | 0 | 49  | Yes | No  | Bonnet et al. 2005. An overview of <i>Calanus helgolandicus</i> ecology in European waters. <i>Progress in Oceanography</i> 65: 1-53                                                                                                                                     |
| Distribution | Zooplankton       | Temperate | North-east Atlantic | 1000000 | 1978 | 23 | 2  | 2  | 0  | 0 | 27  | No  | No  | Lindley JA, Daykin S. 2005. Variations in the distributions of <i>Centropages chierchiae</i> and <i>Temora stylifera</i> (Copepoda: Calanoida) in the north-eastern Atlantic Ocean and western European shelf waters. <i>ICES Journal of Marine Science</i> 62: 869-877. |
| Distribution | Benthic crustacea | Temperate | Bering Sea          | 100000  | 1975 | 27 | 2  | 1  | 0  | 0 | 30  | Yes | Yes | Orensanz J., B. Ernst, D.A. Armstrong, P. Stabeno and P. Livingston 2004. Contraction of the geographic range of distribution of snow crab ( <i>Chionoecetes opilio</i> ) in the eastern Bering Sea: An environmental ratchet? <i>CalCOFI Report</i> 45: 65-79.          |
| Distribution | Bony fish         | Temperate | Bering Sea          | 100000  | 1978 | 25 | 2  | 1  | 0  | 0 | 28  | No  | No  | Orensanz J., B. Ernst, D.A. Armstrong, P. Stabeno and P. Livingston 2004. Contraction of the geographic range of distribution of snow crab ( <i>Chionoecetes opilio</i> ) in the eastern Bering Sea: An environmental ratchet? <i>CalCOFI Report</i> 45: 65-79.          |
| Distribution | Phytoplankton     | Temperate | Mediterranean Sea   | 100000  | 1908 | 98 | 10 | 0  | 3  | 3 | 108 | Yes | No  | Tunin-Ley, A., F. Ibanez, J-P. Labat, A. Zingone and R. Lemee. 2009. Phytoplankton biodiversity and the NW Mediterranean Sea warming: changes in the dinoflagellate genus <i>Ceratium</i> in the 20th                                                                    |

|              |                   |             |                     |          |      |    |    |    |   |   |     |     |     |                                                                                                                                                                                                                                                                        |
|--------------|-------------------|-------------|---------------------|----------|------|----|----|----|---|---|-----|-----|-----|------------------------------------------------------------------------------------------------------------------------------------------------------------------------------------------------------------------------------------------------------------------------|
|              |                   |             |                     |          |      |    |    |    |   |   |     |     |     | century. Marine Ecology Progress Series 375: 85-99                                                                                                                                                                                                                     |
| Distribution | Seabirds          | Subtropical | Southern Ocean      | 1000000  | 1981 | 27 | 12 | 1  | 1 | 1 | 40  | Yes | No  | Peron, C., M. Authier, C. Barbraud, K. Delord, D. Besson and H. Weimerskirch. 2010. Interdecadal changes in at-sea distribution and abundance of subantarctic seabirds along a latitudinal gradient in the Southern Indian Ocean. <i>Global Change Biology</i> 16: 189 |
| Distribution | Seabirds          | Temperate   | Southern Ocean      | 1000000  | 1981 | 27 | 12 | 1  | 2 | 0 | 40  | Yes | No  | Peron, C., M. Authier, C. Barbraud, K. Delord, D. Besson and H. Weimerskirch. 2010. Interdecadal changes in at-sea distribution and abundance of subantarctic seabirds along a latitudinal gradient in the Southern Indian Ocean. <i>Global Change Biology</i> 16: 189 |
| Distribution | Phytoplankton     | Temperate   | North Sea           | 100000   | 1958 | 45 | 4  | 1  | 2 | 0 | 50  | Yes | No  | Edwards, M., D.G. Johns, S.C. Leterme, E. Svendsen and A.J. Richardson. 2006. Regional climate change and harmful algal blooms in the northeast Atlantic. <i>Limnology and Oceanography</i> 51: 820-829                                                                |
| Distribution | Phytoplankton     | Temperate   | North Sea           | 100000   | 1981 | 22 | 4  | 0  | 1 | 0 | 26  | Yes | No  | Edwards, M., D.G. Johns, S.C. Leterme, E. Svendsen and A.J. Richardson. 2006. Regional climate change and harmful algal blooms in the northeast Atlantic. <i>Limnology and Oceanography</i> 51: 820-829                                                                |
| Distribution | Benthic crustacea | Subtropical | East China Sea      | 100000   | 1959 | 47 | 2  | 2  | 0 | 0 | 51  | Yes | No  | Ma, Z., Z. Xu and J. Zhou. 2009. Effect of global warming on the distribution of <i>Lucifer intermedius</i> and <i>L. hanseni</i> (Decapoda) in the Changjiang estuary. <i>Progress in Natural Science</i> 19: 1389-1395                                               |
| Distribution | Phytoplankton     | Temperate   | North-east Atlantic | 1000000  | 1958 | 47 | 1  | 1  | 0 | 0 | 49  | No  | No  | Hays, G.C., A.J. Richardson and C. Robinson. 2005. Climate change and marine plankton. <i>Trends in Ecology and Evolution</i> 20: 337-344                                                                                                                              |
| Distribution | Phytoplankton     | Temperate   | North-west Atlantic | 10000000 | 1962 | 43 | 1  | 1  | 0 | 0 | 45  | Yes | No  | Reid, P.C., et al.. 2007. A biological consequence of reducing Arctic ice cover: arrival of the Pacific diatom <i>Neodenticula seminiae</i> in the North Atlantic for the first time in 800 000 years. <i>Global Change</i>                                            |
| Distribution | Zooplankton       | Temperate   | North-east Atlantic | 1E+08    | 1958 | 48 | 9  | 9  | 0 | 0 | 66  | Yes | Yes | Beaugrand, G., C. Luczak and M. Edwards. 2009. Rapid biogeographical plankton shifts in the North Atlantic Ocean. <i>Global Change Biology</i> 15: 1790-1803                                                                                                           |
| Distribution | Larval            | Subtropical | North-              | 1000000  | 1951 | 52 | 29 | 22 | 2 | 5 | 103 | Yes | No  | Hsieh, C., C.S., Reiss, R.P. Hewitt and G.                                                                                                                                                                                                                             |

|              |                    |             |                    |         |      |     |    |    |    |   |     |     |     |                                                                                                                                                                                                             |
|--------------|--------------------|-------------|--------------------|---------|------|-----|----|----|----|---|-----|-----|-----|-------------------------------------------------------------------------------------------------------------------------------------------------------------------------------------------------------------|
|              | bony fish          |             | west Pacific       |         |      |     |    |    |    |   |     |     |     | Sugihara. 2008. Spatial analysis shows that fishing enhances the climatic sensitivity of marine fishes. Canadian Journal of Fisheries and Aquatic Sciences 65: 947-961                                      |
| Distribution | Benthic cnidarians | Subtropical | Japan Sea          | 1000    | 1931 | 80  | 9  | 4  | 5  | 0 | 93  | No  | No  | Yamano, H. K. Sugihara and K. Nomura. 2011. Rapid poleward range expansion of tropical reef corals in response to rising sea surface temperatures. Geophysical Research Letters 38: L04641                  |
| Distribution | Benthic cnidarians | Subtropical | North-west Pacific | 10000   | 1931 | 80  | 9  | 3  | 6  | 0 | 92  | No  | No  | Yamano, H. K. Sugihara and K. Nomura. 2011. Rapid poleward range expansion of tropical reef corals in response to rising sea surface temperatures. Geophysical Research Letters 38: L04641                  |
| Distribution | Bony fish          | Temperate   | Tasman Sea         | 1000000 | 1880 | 131 | 52 | 16 | 21 | 0 | 199 | Yes | Yes | Last, P.R., et al. 2010. Long-term shifts in abundance and distribution of a temperate fish fauna: a response to climate change and fishing practices. Global Ecology and Biogeography.                     |
| Distribution | Bony fish          | Temperate   | Bass Strait        | 1000000 | 1880 | 131 | 52 | 4  | 0  | 0 | 187 | Yes | Yes | Last, P.R., et al. 2010. Long-term shifts in abundance and distribution of a temperate fish fauna: a response to climate change and fishing practices. Global Ecology and Biogeography..                    |
| Distribution | Bony fish          | Temperate   | Indian Ocean       | 1000000 | 1880 | 131 | 52 | 1  | 0  | 0 | 184 | Yes | Yes | Last, P.R., et al. 2010. Long-term shifts in abundance and distribution of a temperate fish fauna: a response to climate change and fishing practices. Global Ecology and Biogeography.                     |
| Distribution | Non-bony fish      | Temperate   | Bass Strait        | 1000000 | 1880 | 131 | 52 | 1  | 0  | 0 | 184 | No  | Yes | Last, P.R., et al. 2010. Long-term shifts in abundance and distribution of a temperate fish fauna: a response to climate change and fishing practices. Global Ecology and Biogeography.                     |
| Distribution | Non-bony fish      | Temperate   | Tasman Sea         | 1000000 | 1880 | 131 | 52 | 1  | 8  | 0 | 184 | No  | Yes | Last, P.R., et al. 2010. Long-term shifts in abundance and distribution of a temperate fish fauna: a response to climate change and fishing practices. Global Ecology and Biogeography.                     |
| Distribution | Phytoplankton      | Subtropical | Tasman Sea         | 10000   | 1950 | 56  | 1  | 1  | 0  | 0 | 58  | Yes | Yes | Hallegraeff G., W. Hosja, R. Knuckey and C. Wilkinson 2008. Recent range expansion of the red-tide dinoflagellate Noctiluca scintillans in Australian coastal waters. IOC-UNESCO Algae Newsletter 38:10-11. |
| Distribution | Larval bony fish   | Subtropical | North-west Pacific | 1000000 | 1951 | 52  | 34 | 29 | 5  | 0 | 115 | Yes | No  | Hsieh, C., H.J. Kim, W. Watson, E. Di Lorenzo and G. Sugihara. 2009. Climate-driven changes in abundance and distribution of larvae of oceanic                                                              |

|              |                   |           |                     |         |      |    |    |    |   |   |    |     |    |                                                                                                                                                                                                                                                                              |
|--------------|-------------------|-----------|---------------------|---------|------|----|----|----|---|---|----|-----|----|------------------------------------------------------------------------------------------------------------------------------------------------------------------------------------------------------------------------------------------------------------------------------|
|              |                   |           |                     |         |      |    |    |    |   |   |    |     |    | fishes in the southern Californian region. <i>Global Change Biology</i> 15: 2137-2152                                                                                                                                                                                        |
| Distribution | Benthic molluscs  | Temperate | North-east Atlantic | 1000    | 1963 | 42 | 1  | 0  | 1 | 0 | 43 | Yes | No | Mieszowska, N., S. J. Hawkins, M. T. Burrows, and M. A. Kendall. 2007. Long-term changes in the geographic distribution and population structures of <i>Osilinus lineatus</i> (Gastropoda : Trochidae) in Britain and Ireland. <i>Journal of the Marine Biological Assoc</i> |
| Distribution | Benthic molluscs  | Temperate | North-east Atlantic | 1000    | 1971 | 33 | 1  | 1  | 0 | 0 | 35 | Yes | No | Mieszowska, N., S. J. Hawkins, M. T. Burrows, and M. A. Kendall. 2007. Long-term changes in the geographic distribution and population structures of <i>Osilinus lineatus</i> (Gastropoda : Trochidae) in Britain and Ireland. <i>Journal of the Marine Biological Assoc</i> |
| Distribution | Seabirds          | Temperate | North-east Atlantic | 1000000 | 1980 | 24 | 1  | 1  | 0 | 0 | 26 | Yes | No | Wynn, R.B., S.A. Josey, A.P. Martin, D.G. Johns and P. Yesou. 2007. Climate-driven range expansion of a critically endangered top predator in northeast Atlantic waters. <i>Biology Letters</i> 3: 529-532                                                                   |
| Distribution | Benthic crustacea | Temperate | Bering Sea          | 1000000 | 1982 | 25 | 46 | 6  | 0 | 5 | 77 | Yes | No | Mueter, F.J. and M.A. Litzow. 2008. Sea ice retreat alters the biogeography of the bering sea continental shelf. <i>Ecological Applications</i> 18: 309-302                                                                                                                  |
| Distribution | Bony fish         | Temperate | Bering Sea          | 1000000 | 1982 | 25 | 46 | 25 | 5 | 5 | 96 | Yes | No | Mueter, F.J. and M.A. Litzow. 2008. Sea ice retreat alters the biogeography of the bering sea continental shelf. <i>Ecological Applications</i> 18: 309-302                                                                                                                  |
| Distribution | Non-bony fish     | Temperate | Bering Sea          | 1000000 | 1982 | 25 | 46 | 1  | 0 | 0 | 72 | Yes | No | Mueter, F.J. and M.A. Litzow. 2008. Sea ice retreat alters the biogeography of the bering sea continental shelf. <i>Ecological Applications</i> 18: 309-302                                                                                                                  |
| Distribution | Bony fish         | Temperate | North-east Atlantic | 1000000 | 1966 | 30 | 6  | 1  | 0 | 0 | 37 | No  | No | Quero, J. 1998. Changes in the Euro-Atlantic fish species composition resulting from fishing and ocean warming. <i>Italian Journal of Zoology</i> 65:493-499                                                                                                                 |
| Distribution | Bony fish         | Temperate | North-east Atlantic | 1000000 | 1960 | 36 | 6  | 2  | 0 | 0 | 44 | No  | No | Quero, J. 1998. Changes in the Euro-Atlantic fish species composition resulting from fishing and ocean warming. <i>Italian Journal of Zoology</i> 65:493-499                                                                                                                 |
| Distribution | Bony fish         | Temperate | North-east Atlantic | 1000000 | 1963 | 33 | 6  | 1  | 0 | 0 | 40 | No  | No | Quero, J. 1998. Changes in the Euro-Atlantic fish species composition resulting from fishing and ocean warming. <i>Italian Journal of Zoology</i>                                                                                                                            |

|              |                         |             |                    |      |      |    |    |    |   |    |     |     |    |                                                                                                                                                                                                                                          |
|--------------|-------------------------|-------------|--------------------|------|------|----|----|----|---|----|-----|-----|----|------------------------------------------------------------------------------------------------------------------------------------------------------------------------------------------------------------------------------------------|
|              |                         |             |                    |      |      |    |    |    |   |    |     |     |    | 65:493-499                                                                                                                                                                                                                               |
| Distribution | Benthic cnidarians      | Subtropical | South-west Pacific | 1000 | 1955 | 54 | 29 | 0  | 2 | 0  | 83  | Yes | No | Poloczanska, E.S., et al. 2011. Little change in the distribution of rocky shore faunal communities on the East Australian coast after 50 years of rapid warming. <i>Journal of Experimental Marine Biology and Ecology</i> 400: 145-154 |
| Distribution | Benthic crustacea       | Subtropical | South-west Pacific | 1000 | 1955 | 54 | 29 | 3  | 3 | 0  | 86  | Yes | No | Poloczanska, E.S., et al. 2011. Little change in the distribution of rocky shore faunal communities on the East Australian coast after 50 years of rapid warming. <i>Journal of Experimental Marine Biology and Ecology</i> 400: 145-154 |
| Distribution | Benthic crustacea       | Tropical    | South-west Pacific | 1000 | 1955 | 54 | 29 | 0  | 1 | 0  | 83  | Yes | No | Poloczanska, E.S., et al. 2011. Little change in the distribution of rocky shore faunal communities on the East Australian coast after 50 years of rapid warming. <i>Journal of Experimental Marine Biology and Ecology</i> 400: 145-154 |
| Distribution | Benthic invert. (other) | Subtropical | South-west Pacific | 1000 | 1955 | 54 | 29 | 0  | 3 | 0  | 83  | Yes | No | Poloczanska, E.S., et al. 2011. Little change in the distribution of rocky shore faunal communities on the East Australian coast after 50 years of rapid warming. <i>Journal of Experimental Marine Biology and Ecology</i> 400: 145-154 |
| Distribution | Benthic molluscs        | Subtropical | South-west Pacific | 1000 | 1955 | 54 | 29 | 4  | 9 | 4  | 87  | Yes | No | Poloczanska, E.S., et al. 2011. Little change in the distribution of rocky shore faunal communities on the East Australian coast after 50 years of rapid warming. <i>Journal of Experimental Marine Biology and Ecology</i> 400: 145-154 |
| Distribution | Benthic crustacea       | Temperate   | Tasman Sea         | 1000 | 1955 | 54 | 14 | 1  | 2 | 0  | 69  | Yes | No | Pitt N, Poloczanska E.S. and Hobday A.J. 2010 Climate-driven range changes in Tasmanian intertidal fauna. <i>Marine and Freshwater Research</i> 61: 963-970                                                                              |
| Distribution | Benthic invert. (other) | Temperate   | Tasman Sea         | 1000 | 1955 | 54 | 14 | 2  | 1 | 0  | 70  | Yes | No | Pitt N, Poloczanska E.S. and Hobday A.J. 2010 Climate-driven range changes in Tasmanian intertidal fauna. <i>Marine and Freshwater Research</i> 61: 963-970                                                                              |
| Distribution | Benthic molluscs        | Temperate   | Tasman Sea         | 1000 | 1955 | 54 | 14 | 1  | 7 | 0  | 69  | Yes | No | Pitt N, Poloczanska E.S. and Hobday A.J. 2010 Climate-driven range changes in Tasmanian intertidal fauna. <i>Marine and Freshwater Research</i> 61: 963-970                                                                              |
| Distribution | Benthic algae           | Subtropical | Indian Ocean       | 1000 | 1951 | 50 | 52 | 25 | 1 | 19 | 127 | No  | No | Wernberg T., et al. 2011 Seaweed communities in retreat from global warming. <i>Current Biology</i> 21: 1-5                                                                                                                              |
| Distribution | Benthic                 | Subtropical | South-             | 1000 | 1951 | 50 | 52 | 6  | 0 | 1  | 108 | No  | No | Wernberg T., et al. 2011 Seaweed communities in                                                                                                                                                                                          |

|                  |                   |             |                    |         |      |    |    |   |   |   |    |    |    |                                                                                                                                                                                                                                                   |
|------------------|-------------------|-------------|--------------------|---------|------|----|----|---|---|---|----|----|----|---------------------------------------------------------------------------------------------------------------------------------------------------------------------------------------------------------------------------------------------------|
|                  | algae             |             | west Pacific       |         |      |    |    |   |   |   |    |    |    | retreat from global warming. Current Biology 21: 1-5                                                                                                                                                                                              |
| Distribution     | Bony fish         | Temperate   | North Sea          | 1000000 | 1923 | 85 | 2  | 1 | 0 | 0 | 88 | NA | NA | Engelhard, G.H. Pinnegar, J.K., Kell, L.T., Rijnsdorp, A.D. 2011. Nine decades of North Sea sole and plaice distribution. ICES J. Mar. Sci. 68(6): 1090-1104.                                                                                     |
| Distribution     | Bony fish         | Temperate   | North Sea          | 1000000 | 1913 | 95 | 2  | 1 | 0 | 0 | 98 | NA | NA | Engelhard, G.H. Pinnegar, J.K., Kell, L.T., Rijnsdorp, A.D. 2011. Nine decades of North Sea sole and plaice distribution. ICES J. Mar. Sci. 68(6): 1090-1104.                                                                                     |
| Distribution     | Mangroves         | Tropical    | South-west Pacific | 100     | 1961 | 44 | 1  | 4 | 0 | 0 | 49 | NA | NA | Gilman, E., Ellison, J. And Coleman, R. 2007 Assessment of mangrove response to projected relative sea-level rise and recent historical reconstruction of shoreline position Environmental Monitoring and Assessment 124:105-130                  |
| Distribution     | Mangroves         | Tropical    | South-west Pacific | 1000    | 1961 | 44 | 1  | 2 | 0 | 0 | 47 | NA | NA | Gilman, E., Ellison, J. And Coleman, R. 2007 Assessment of mangrove response to projected relative sea-level rise and recent historical reconstruction of shoreline position Environmental Monitoring and Assessment 124:105-130                  |
| Distribution     | Bony fish         | Temperate   | Mediterranean Sea  | 100     | 1983 | 19 | 35 | 1 | 0 | 0 | 55 | No | No | Azzurro, E. 2008. The advance of thermophilic fishes in the Mediterranean Sea: overview and methodological questions. Climate Warming and Related Changes in Mediterranean Marine Biota. Helgoland May 2008. CIESM F. Briand Ed. 152 pages Monaco |
| <i>PHENOLOGY</i> |                   |             |                    |         |      |    |    |   |   |   |    |    |    |                                                                                                                                                                                                                                                   |
| Phenology        | Bony fish         | Temperate   | Baltic Sea         | 1000000 | 1951 | 48 | 2  | 1 | 0 | 0 | 51 | No | No | Ahas, R. and A. Aasa 2006. The effects of climate change on the phenology of selected Estonian plant, bird and fish populations. International Journal of Biometeorology 51:17:26                                                                 |
| Phenology        | Benthic crustacea | Temperate   | North Sea          | 1       | 1973 | 29 | 3  | 1 | 0 | 0 | 33 | No | No | Philippart, C. J. M., et al. 2003. Climate-related changes in recruitment of the bivalve <i>Macoma balthica</i> . Limnology and Oceanography 48:2171-2185.                                                                                        |
| Phenology        | Phytoplankton     | Temperate   | North Sea          | 1       | 1973 | 29 | 3  | 0 | 1 | 0 | 32 | No | No | Philippart, C. J. M., et al. 2003. Climate-related changes in recruitment of the bivalve <i>Macoma balthica</i> . Limnology and Oceanography 48:2171-2185.                                                                                        |
| Phenology        | Turtles           | Subtropical | North-             | 100     | 1983 | 23 | 1  | 0 | 1 | 0 | 24 | No | No | Hawkes, L., M. A. C. Broderick, M. H. Godfrey,                                                                                                                                                                                                    |

|           |                  |           |                     |         |      |    |   |   |   |   |    |     |    |                                                                                                                                                                                                                                                                      |                                                                                                                                                       |
|-----------|------------------|-----------|---------------------|---------|------|----|---|---|---|---|----|-----|----|----------------------------------------------------------------------------------------------------------------------------------------------------------------------------------------------------------------------------------------------------------------------|-------------------------------------------------------------------------------------------------------------------------------------------------------|
|           |                  |           | west Atlantic       |         |      |    |   |   |   |   |    |     |    |                                                                                                                                                                                                                                                                      | and B. J. Godley. 2007. Investigating the potential impacts of climate change on a marine turtle population. <i>Global Change Biology</i> 13:923-932. |
| Phenology | Benthic molluscs | Temperate | North Sea           | 100     | 1969 | 39 | 1 | 1 | 0 | 0 | 41 | No  | No | Beukema, J.J., Dekker, R., Jansen, J.M. 2009. Some like it cold: populations of the tellinid bivalve <i>Macoma balthica</i> (L.) suffer in various ways from a warming climate. <i>Marine Ecology Progress Series</i> 384: 135-145                                   |                                                                                                                                                       |
| Phenology | Bony fish        | Temperate | North-east Atlantic | 100000  | 1981 | 25 | 2 | 1 | 0 | 0 | 28 | Yes | No | Dufour, F., H. Arrizabalaga, X. Irigoien and J. Santiago. 2010. Climate impacts on albacore and bluefin tunas migrations phenology and spatial distribution. <i>Progress in Oceanography</i> 86: 283-290                                                             |                                                                                                                                                       |
| Phenology | Bony fish        | Temperate | North-east Atlantic | 1000000 | 1967 | 39 | 2 | 1 | 0 | 0 | 42 | Yes | No | Dufour, F., H. Arrizabalaga, X. Irigoien and J. Santiago. 2010. Climate impacts on albacore and bluefin tunas migrations phenology and spatial distribution. <i>Progress in Oceanography</i> 86: 283-290                                                             |                                                                                                                                                       |
| Phenology | Zooplankton      | Temperate | North-west Atlantic | 1000    | 1951 | 53 | 2 | 1 | 0 | 0 | 56 | No  | No | Costello, J.H, B.K. Sullivan and D.J. Gifford. 2006. A physical-biological interaction underlying variable phenological responses to climate change by coastal zooplankton. <i>Journal of Plankton Research</i> 28:1099-1105                                         |                                                                                                                                                       |
| Phenology | Bony fish        | Temperate | North-east Atlantic | 100     | 1978 | 31 | 1 | 1 | 0 | 0 | 33 | Yes | No | Kennedy, R. J. and W. W. Crozier. 2010. Evidence of changing migratory patterns of wild Atlantic salmon <i>Salmo salar</i> smolts in the River Bush, Northern Ireland, and possible associations with climate change. <i>Journal of Fish Biology</i> . 76: 1786-1805 |                                                                                                                                                       |
| Phenology | Bony fish        | Temperate | North-west Atlantic | 1       | 1954 | 39 | 5 | 1 | 0 | 0 | 45 | Yes | No | Juanes, F., S. Gephard and K.F. Beland. 2004. Long-term changes in migration timing of adult Atlantic salmon ( <i>Salmo salar</i> ) at the southern edge of the species distribution. <i>Canadian journal of Fisheries and Aquatic Sciences</i> 61:2392-2400         |                                                                                                                                                       |
| Phenology | Bony fish        | Temperate | North-west Atlantic | 1       | 1967 | 33 | 5 | 1 | 0 | 0 | 39 | Yes | No | Juanes, F., S. Gephard and K.F. Beland. 2004. Long-term changes in migration timing of adult Atlantic salmon ( <i>Salmo salar</i> ) at the southern edge of the species distribution. <i>Canadian journal of Fisheries and Aquatic Sciences</i> 61:2392-2400         |                                                                                                                                                       |
| Phenology | Bony fish        | Temperate | North-west Atlantic | 1       | 1978 | 23 | 5 | 2 | 0 | 0 | 30 | Yes | No | Juanes, F., S. Gephard and K.F. Beland. 2004. Long-term changes in migration timing of adult Atlantic salmon ( <i>Salmo salar</i> ) at the southern                                                                                                                  |                                                                                                                                                       |

|           |                  |             |                     |        |      |    |    |   |   |   |    |     |    |                                                                                                                                                                                                                                                                       |
|-----------|------------------|-------------|---------------------|--------|------|----|----|---|---|---|----|-----|----|-----------------------------------------------------------------------------------------------------------------------------------------------------------------------------------------------------------------------------------------------------------------------|
|           |                  |             |                     |        |      |    |    |   |   |   |    |     |    | edge of the species distribution. Canadian journal of Fisheries and Aquatic Sciences 61:2392-2400                                                                                                                                                                     |
| Phenology | Bony fish        | Temperate   | North-west Atlantic | 1      | 1978 | 24 | 5  | 1 | 0 | 0 | 30 | Yes | No | Juanes, F., S. Gephard and K.F. Beland. 2004. Long-term changes in migration timing of adult Atlantic salmon ( <i>Salmo salar</i> ) at the southern edge of the species distribution. Canadian journal of Fisheries and Aquatic Sciences 61:2392-2400                 |
| Phenology | Benthic molluscs | Temperate   | North-east Atlantic | 100    | 1946 | 62 | 2  | 2 | 0 | 0 | 66 | No  | No | Moore, P.J., R.C. Thompson and S.J. Hawkins. 2011. Phenological changes in intertidal con-specific gastropods in response to climate warming. <i>Global Change Biology</i> 17: 709-717                                                                                |
| Phenology | Bony fish        | Temperate   | North Sea           | 100000 | 1970 | 35 | 2  | 2 | 0 | 0 | 39 | Yes | No | Teal, L.R., J.J. de Leeuw, H.W. van der Veer and A.D. Rijnsdorp. 2008. Effects of climate change on growth of 0-group sole and plaice. <i>Marine Ecology Progress Series</i> 358:219-230                                                                              |
| Phenology | Seabirds         | Subtropical | North-east Pacific  | 10     | 1973 | 29 | 1  | 1 | 0 | 0 | 31 | No  | No | Abraham, C.L. and W.J. Sydeman. 2004. Ocean climate, euphausiids and auklet nesting: inter-annual trends and variation in phenology, diet and growth of a planktivorous seabird, <i>Ptychoramphus aleuticus</i> . <i>Marine Ecology Progress Series</i> 274: 235-250. |
| Phenology | Seabirds         | Polar       | Southern Ocean      | 10     | 1950 | 55 | 10 | 5 | 0 | 0 | 70 | No  | No | Barbraud, C. and H. Weimerskirch. 2006. Antarctic birds breed later in response to climate change. <i>Proceedings of the National Academy of Sciences</i> 103: 6248-6251.                                                                                             |
| Phenology | Seabirds         | Polar       | Southern Ocean      | 10     | 1959 | 46 | 10 | 1 | 0 | 0 | 57 | No  | No | Barbraud, C. and H. Weimerskirch. 2006. Antarctic birds breed later in response to climate change. <i>Proceedings of the National Academy of Sciences</i> 103: 6248-6251.                                                                                             |
| Phenology | Seabirds         | Polar       | Southern Ocean      | 10     | 1960 | 45 | 10 | 1 | 0 | 0 | 56 | No  | No | Barbraud, C. and H. Weimerskirch. 2006. Antarctic birds breed later in response to climate change. <i>Proceedings of the National Academy of Sciences</i> 103: 6248-6251.                                                                                             |
| Phenology | Seabirds         | Polar       | Southern Ocean      | 10     | 1970 | 35 | 10 | 1 | 0 | 0 | 46 | No  | No | Barbraud, C. and H. Weimerskirch. 2006. Antarctic birds breed later in response to climate change. <i>Proceedings of the National Academy of Sciences</i> 103: 6248-6251.                                                                                             |
| Phenology | Seabirds         | Polar       | Southern Ocean      | 10     | 1980 | 25 | 10 | 1 | 0 | 0 | 36 | No  | No | Barbraud, C. and H. Weimerskirch. 2006. Antarctic birds breed later in response to climate change. <i>Proceedings of the National Academy of Sciences</i> 103: 6248-6251.                                                                                             |
| Phenology | Seabirds         | Temperate   | Bering              | 10     | 1975 | 31 | 4  | 4 | 0 | 4 | 39 | No  | No | Byrd, G.V., W.J. Sydeman, H.M. Renner, and S.                                                                                                                                                                                                                         |



|           |                  |             |                     |        |      |    |    |    |   |   |     |     |    |                                                                                                                                                                                                                                    |
|-----------|------------------|-------------|---------------------|--------|------|----|----|----|---|---|-----|-----|----|------------------------------------------------------------------------------------------------------------------------------------------------------------------------------------------------------------------------------------|
|           |                  |             | Sea                 |        |      |    |    |    |   |   |     |     |    | Minobe. 2008. Responses of piscivorous seabirds at the Pribilof Islands to ocean climate. <i>Deep-Sea Research II</i> 55: 1856-1867.                                                                                               |
| Phenology | Seabirds         | Subtropical | Bass Strait         | 1      | 1968 | 31 | 1  | 0  | 0 | 1 | 32  | Yes | No | Chambers, L.E. 2004. Delayed breeding in Little Penguins-- evidence of climate change? <i>Australian Meteorological Magazine</i> 53: 13-19.                                                                                        |
| Phenology | Seabirds         | Temperate   | North-east Atlantic | 1      | 1977 | 30 | 1  | 1  | 0 | 0 | 32  | Yes | No | D'Alba, L., P. Monaghan, and R.G. Nager. 2010. Advances in laying date and increasing population size suggest positive responses to climate change in Common Eiders <i>Somateria mollissima</i> in Iceland. <i>Ibis</i> 152:19-28. |
| Phenology | Larval bony fish | Temperate   | North Sea           | 100000 | 1958 | 45 | 50 | 2  | 0 | 0 | 97  | Yes | No | Edwards, M. and A.J. Richardson. 2004. Impact of climate change on marine pelagic phenology and trophic mismatch. <i>Nature</i> 430: 881-884.                                                                                      |
| Phenology | Phytoplankton    | Temperate   | North Sea           | 100000 | 1958 | 45 | 50 | 18 | 0 | 3 | 113 | Yes | No | Edwards, M. and A.J. Richardson. 2004. Impact of climate change on marine pelagic phenology and trophic mismatch. <i>Nature</i> 430: 881-884.                                                                                      |
| Phenology | Zooplankton      | Temperate   | North Sea           | 100000 | 1958 | 45 | 50 | 23 | 0 | 4 | 118 | Yes | No | Edwards, M. and A.J. Richardson. 2004. Impact of climate change on marine pelagic phenology and trophic mismatch. <i>Nature</i> 430: 881-884.                                                                                      |
| Phenology | Seabirds         | Temperate   | Hudson Bay          | 10     | 1984 | 20 | 1  | 1  | 0 | 0 | 22  | No  | No | Gaston, A.J., H.G. Gilchrist and J.M. Hipfner. 2005. Climate change, ice conditions and reproduction in an Arctic nesting marine bird: Brunnich's guillemot ( <i>Uria lomvia</i> L.). <i>Journal of Animal Ecology</i> 74:832-841. |
| Phenology | Larval bony fish | Temperate   | North Sea           | 1      | 1975 | 19 | 42 | 3  | 0 | 0 | 64  | Yes | No | Greve, W., F. Reiners and J. Nast. 1996. Biocoenotic changes of the zooplankton in the German Bight: the possible effects of eutrophication and climate. <i>ICES Journal of Marine Science</i> . 53: 951-956.                      |
| Phenology | Phytoplankton    | Temperate   | North Sea           | 1      | 1975 | 19 | 42 | 1  | 0 | 0 | 62  | Yes | No | Greve, W., F. Reiners and J. Nast. 1996. Biocoenotic changes of the zooplankton in the German Bight: the possible effects of eutrophication and climate. <i>ICES Journal of Marine Science</i> . 53: 951-956.                      |
| Phenology | Zooplankton      | Temperate   | North Sea           | 1      | 1975 | 19 | 42 | 23 | 0 | 6 | 84  | Yes | No | Greve, W., F. Reiners and J. Nast. 1996. Biocoenotic changes of the zooplankton in the German Bight: the possible effects of eutrophication and climate. <i>ICES Journal of Marine Science</i> . 53: 951-956.                      |
| Phenology | Seabirds         | Temperate   | North Sea           | 10000  | 1929 | 70 | 1  | 1  | 0 | 0 | 72  | No  | No | Moller, A.P., E. Flensted-Jensen and W. Mardel. 2006. Rapidly advancing laying date in a seabird                                                                                                                                   |

|           |          |           |                     |         |      |    |    |   |   |   |    |     |    |                                                                                                                                                                                        |
|-----------|----------|-----------|---------------------|---------|------|----|----|---|---|---|----|-----|----|----------------------------------------------------------------------------------------------------------------------------------------------------------------------------------------|
|           |          |           |                     |         |      |    |    |   |   |   |    |     |    | and the changing advantage of early reproduction. <i>Journal of Animal Ecology</i> 75:657-665.                                                                                         |
| Phenology | Seabirds | Temperate | North Sea           | 10      | 1971 | 36 | 8  | 1 | 1 | 2 | 45 | No  | No | Wanless, S., M. Frederiksen, J. Walton and M.P. Harris. 2009. Long-term changes in breeding phenology at two seabird colonies in the western North Sea. <i>Ibis</i> 151:274-285.       |
| Phenology | Seabirds | Temperate | North Sea           | 10      | 1972 | 35 | 10 | 0 | 2 | 0 | 45 | No  | No | Wanless, S., M. Frederiksen, J. Walton and M.P. Harris. 2009. Long-term changes in breeding phenology at two seabird colonies in the western North Sea. <i>Ibis</i> 151:274-285.       |
| Phenology | Seabirds | Temperate | North Sea           | 10      | 1972 | 35 | 8  | 2 | 1 | 0 | 45 | No  | No | Wanless, S., M. Frederiksen, J. Walton and M.P. Harris. 2009. Long-term changes in breeding phenology at two seabird colonies in the western North Sea. <i>Ibis</i> 151:274-285.       |
| Phenology | Seabirds | Temperate | North Sea           | 10      | 1974 | 33 | 8  | 0 | 0 | 1 | 41 | No  | No | Wanless, S., M. Frederiksen, J. Walton and M.P. Harris. 2009. Long-term changes in breeding phenology at two seabird colonies in the western North Sea. <i>Ibis</i> 151:274-285.       |
| Phenology | Seabirds | Temperate | North Sea           | 10      | 1976 | 31 | 8  | 0 | 2 | 0 | 39 | No  | No | Wanless, S., M. Frederiksen, J. Walton and M.P. Harris. 2009. Long-term changes in breeding phenology at two seabird colonies in the western North Sea. <i>Ibis</i> 151:274-285.       |
| Phenology | Seabirds | Temperate | North Sea           | 10      | 1979 | 28 | 8  | 0 | 2 | 0 | 36 | No  | No | Wanless, S., M. Frederiksen, J. Walton and M.P. Harris. 2009. Long-term changes in breeding phenology at two seabird colonies in the western North Sea. <i>Ibis</i> 151:274-285.       |
| Phenology | Seabirds | Temperate | North Sea           | 10      | 1981 | 26 | 8  | 0 | 0 | 1 | 34 | No  | No | Wanless, S., M. Frederiksen, J. Walton and M.P. Harris. 2009. Long-term changes in breeding phenology at two seabird colonies in the western North Sea. <i>Ibis</i> 151:274-285.       |
| Phenology | Seabirds | Temperate | North Sea           | 10      | 1982 | 25 | 10 | 0 | 0 | 1 | 35 | No  | No | Wanless, S., M. Frederiksen, J. Walton and M.P. Harris. 2009. Long-term changes in breeding phenology at two seabird colonies in the western North Sea. <i>Ibis</i> 151:274-285.       |
| Phenology | Seabirds | Temperate | North Sea           | 10      | 1983 | 24 | 8  | 0 | 1 | 0 | 32 | No  | No | Wanless, S., M. Frederiksen, J. Walton and M.P. Harris. 2009. Long-term changes in breeding phenology at two seabird colonies in the western North Sea. <i>Ibis</i> 151:274-285.       |
| Phenology | Seabirds | Temperate | North-east Atlantic | 1000000 | 1980 | 28 | 1  | 0 | 0 | 1 | 29 | Yes | No | Wanless, S., M.P. Harris, S. Lewis, M. Frederiksen and S. Murray. 2008. Later breeding in northern gannets in the eastern Atlantic. <i>Marine Ecology Progress Series</i> 370:263-269. |

|           |               |             |                    |     |      |    |    |   |   |   |    |     |    |                                                                                                                                                                                                                                                                       |
|-----------|---------------|-------------|--------------------|-----|------|----|----|---|---|---|----|-----|----|-----------------------------------------------------------------------------------------------------------------------------------------------------------------------------------------------------------------------------------------------------------------------|
| Phenology | Phytoplankton | Temperate   | North Sea          | 1   | 1962 | 40 | 1  | 0 | 1 | 0 | 41 | No  | No | Wiltshire, K.H. and B.F.J. Manly. 2004. The warming trend at Helgoland Roads, North Sea: phytoplankton response. <i>Helgoland Marine Research</i> 58: 269-273                                                                                                         |
| Phenology | Zooplankton   | Temperate   | North Sea          | 1   | 1975 | 30 | 3  | 2 | 1 | 0 | 35 | No  | No | Schluter, M.H., et al. 2010. Phenological shifts in three interacting zooplankton groups in relation to climate change. <i>Global Change Biology</i> doi: 10.1111/j.1365-2486.2010.02246.x                                                                            |
| Phenology | Zooplankton   | Temperate   | North-west Pacific | 1   | 1968 | 29 | 1  | 1 | 0 | 0 | 31 | Yes | No | Mackas, D.L., R. Goldblatt and A.G. Lewis. 1998. Interdecadal variation in developmental timing of <i>Neocalanus plumchrus</i> populations at Ocean Station P in the subarctic North Pacific. <i>Canadian Journal of Fisheries and Aquatic Sciences</i> 55: 1878-1893 |
| Phenology | Seabirds      | Temperate   | North-east Pacific | 10  | 1975 | 25 | 5  | 3 | 1 | 0 | 33 | No  | No | Bertram, D.F., D.L. Mackas, and S.M. McKinnell. 2001. The seasonal cycle revisited: interannual variation and ecosystem consequences. <i>Progress in Oceanography</i> 49: 283-307.                                                                                    |
| Phenology | Zooplankton   | Temperate   | North-east Pacific | 1   | 1975 | 22 | 5  | 1 | 0 | 0 | 28 | No  | No | Bertram, D.F., D.L. Mackas, and S.M. McKinnell. 2001. The seasonal cycle revisited: interannual variation and ecosystem consequences. <i>Progress in Oceanography</i> 49: 283-307.                                                                                    |
| Phenology | Zooplankton   | Temperate   | North-east Pacific | 1   | 1975 | 24 | 5  | 1 | 0 | 0 | 30 | No  | No | Bertram, D.F., D.L. Mackas, and S.M. McKinnell. 2001. The seasonal cycle revisited: interannual variation and ecosystem consequences. <i>Progress in Oceanography</i> 49: 283-307.                                                                                    |
| Phenology | Zooplankton   | Temperate   | North Sea          | 1   | 1974 | 31 | 1  | 1 | 0 | 0 | 33 | No  | No | Greve, W, Reiners, F, Nusta, Hoffmann S. 2004. Helgoland Roads meso- and macrozooplankton time-series 1974 to 2004: lessons from 30 years of single spot, high frequency sampling at the only off-shore island of the North Sea. <i>Helgoland Marine Research</i> 58: |
| Phenology | Seabirds      | Polar       | Greenland Sea      | 100 | 1963 | 46 | 2  | 1 | 0 | 0 | 49 | No  | No | Moe, B., et al. 2009. Climate change and phenological responses of two seabird species breeding in the high Arctic. <i>Marine Ecology Progress Series</i> 393: 235-246                                                                                                |
| Phenology | Seabirds      | Polar       | Greenland Sea      | 100 | 1970 | 39 | 2  | 0 | 0 | 1 | 41 | No  | No | Moe, B., et al. 2009. Climate change and phenological responses of two seabird species breeding in the high Arctic. <i>Marine Ecology Progress Series</i> 393: 235-246                                                                                                |
| Phenology | Seabirds      | Subtropical | North-east         | 10  | 1972 | 35 | 11 | 1 | 0 | 0 | 47 | Yes | No | Sydeaman, W.J. et al. 2009. Seabirds and climate in the California Current--A synthesis of change.                                                                                                                                                                    |

|           |               |             |                     |          |      |    |    |   |   |   |     |     |    |                                                                                                                                                                                                                                                   |
|-----------|---------------|-------------|---------------------|----------|------|----|----|---|---|---|-----|-----|----|---------------------------------------------------------------------------------------------------------------------------------------------------------------------------------------------------------------------------------------------------|
|           |               |             | Pacific             |          |      |    |    |   |   |   |     |     |    | CalCOFI Report 50:82-104.                                                                                                                                                                                                                         |
| Phenology | Seabirds      | Subtropical | North-east Pacific  | 10       | 1973 | 35 | 11 | 1 | 0 | 0 | 47  | Yes | No | Sydeman, W.J. et al. 2009. Seabirds and climate in the California Current--A synthesis of change. CalCOFI Report 50:82-104.                                                                                                                       |
| Phenology | Phytoplankton | Temperate   | Mediterranean Sea   | 100000   | 1908 | 98 | 10 | 1 | 0 | 0 | 109 | No  | No | Tunin-Ley, A., F. Ibanez, J-P. Labat, A. Zingone and R. Lemee. 2009. Phytoplankton biodiversity and the NW Mediterranean Sea warming: changes in the dinoflagellate genus Ceratium in the 20th century. Marine Ecology Progress Series 375: 85-99 |
| Phenology | Phytoplankton | Temperate   | North Sea           | 1        | 1962 | 45 | 6  | 2 | 0 | 1 | 53  | No  | No | Wiltshire, K.H., et al. 2010. Helgoland Roads, North Sea: 45 years of change. Estuaries and Coasts 33:295-310                                                                                                                                     |
| Phenology | Seabirds      | Temperate   | North-west Pacific  | 10       | 1975 | 28 | 1  | 1 | 0 | 0 | 30  | No  | No | Gjerdum, C., et al. 2003. Tufted puffin reproduction reveals ocean climate variability. Proceedings of the National Academy of Science 100: 9377-9382                                                                                             |
| Phenology | Seagrass      | Subtropical | Mediterranean Sea   | 1000000  | 1973 | 32 | 1  | 2 | 0 | 0 | 35  | Yes | No | Diaz-Almela, E., N. Marba, and C. M. Duarte. 2007. Consequences of Mediterranean warming events in seagrass ( <i>Posidonia oceanica</i> ) flowering records. Global Change Biology. 13: 224-235.                                                  |
| Phenology | Seagrass      | Subtropical | Mediterranean Sea   | 10000000 | 1973 | 32 | 1  | 2 | 0 | 0 | 35  | Yes | No | Diaz-Almela, E., N. Marba, and C. M. Duarte. 2007. Consequences of Mediterranean warming events in seagrass ( <i>Posidonia oceanica</i> ) flowering records. Global Change Biology. 13: 224-235.                                                  |
| Phenology | Seagrass      | Temperate   | Mediterranean Sea   | 10000    | 1973 | 32 | 1  | 1 | 0 | 0 | 34  | Yes | No | Diaz-Almela, E., N. Marba, and C. M. Duarte. 2007. Consequences of Mediterranean warming events in seagrass ( <i>Posidonia oceanica</i> ) flowering records. Global Change Biology. 13: 224-235.                                                  |
| Phenology | Seabirds      | Temperate   | North Sea           | 10       | 1969 | 34 | 3  | 1 | 0 | 0 | 38  | Yes | No | Frederiksen, M., M.P. Harris, F. Daunt, P. Rothery, and S. Wanless. 2004. Scale-dependent climate signals drive breeding phenology of three seabird species. Global Change Biology 10: 1214-1221.                                                 |
| Phenology | Seabirds      | Temperate   | North-east Atlantic | 10       | 1981 | 22 | 3  | 0 | 0 | 1 | 25  | Yes | No | Frederiksen, M., M.P. Harris, F. Daunt, P. Rothery, and S. Wanless. 2004. Scale-dependent climate signals drive breeding phenology of three seabird species. Global Change Biology 10: 1214-1221.                                                 |
| Phenology | Seabirds      | Temperate   | North-east Atlantic | 10       | 1982 | 21 | 3  | 0 | 0 | 1 | 24  | Yes | No | Frederiksen, M., M.P. Harris, F. Daunt, P. Rothery, and S. Wanless. 2004. Scale-dependent climate signals drive breeding phenology of three                                                                                                       |

|           |          |             |                    |     |      |    |   |   |   |   |    |     |     |                                                                                                                                                                                                                                                                  |
|-----------|----------|-------------|--------------------|-----|------|----|---|---|---|---|----|-----|-----|------------------------------------------------------------------------------------------------------------------------------------------------------------------------------------------------------------------------------------------------------------------|
|           |          |             |                    |     |      |    |   |   |   |   |    |     |     | seabird species. Global Change Biology 10: 1214-1221.                                                                                                                                                                                                            |
| Phenology | Seabirds | Temperate   | Irish Sea          | 10  | 1973 | 36 | 1 | 0 | 0 | 1 | 37 | Yes | Yes | Votier, S.C., B.J. Hatchwell, M. Mears and T.R. Birkhead. 2009. Changes in the timing of egg-laying of a colonial seabird in relation to population size and environmental conditions. Marine Ecology Progress Series 393:225-233.                               |
| Phenology | Turtles  | Subtropical | Mediterranean Sea  | 10  | 1984 | 24 | 1 | 1 | 0 | 0 | 26 | No  | No  | Mazaris, A. D., A. S. Kallimanis, S. P. Sgardelis, and J. D. Pantis. 2009. Sea surface temperature variations in core foraging grounds drive nesting trends and phenology of loggerhead turtles in the Mediterranean Sea. Journal of Experimental Marine Biology |
| Phenology | Turtles  | Subtropical | Mediterranean Sea  | 100 | 1984 | 19 | 1 | 1 | 0 | 0 | 21 | No  | No  | Mazaris, A. D., A. S. Kallimanis, S. P. Sgardelis, and J. D. Pantis. 2008. Do long-term changes in sea surface temperature at the breeding areas affect the breeding dates and reproduction performance of Mediterranean loggerhead turtles? Implications for c  |
| Phenology | Seabirds | Subtropical | North-east Pacific | 10  | 1988 | 19 | 2 | 1 | 0 | 1 | 22 | No  | No  | Schroeder, I.D., W.J. Sydeman, N. Sarkar, S.A. Thompson, S.J. Bograd and F.B. Schwing. 2009. Winter pre-conditioning of seabird phenology in the California Current. Marine Ecology Progress Series 393:211-223.                                                 |

## Global imprint of climate change on marine life

**Supplementary Table S6.** Observations of shifts in distribution in  $\text{km dec}^{-1}$  by season. Taxa = taxonomic group, Biome, Region, Study Area = size of study site, Start Year = first year of data series, Timespan, Alt Drivers? = other drivers of change considered, Stat Tests = statistical tests applied to show a relationship with changing climate.

| Taxa         | Biome     | Region              | Study Area | Start Year | Time Span | $\text{km dec}^{-1}$ | Alt Drivers | Stat Tests | Citation                                                                                                                                                                                            |
|--------------|-----------|---------------------|------------|------------|-----------|----------------------|-------------|------------|-----------------------------------------------------------------------------------------------------------------------------------------------------------------------------------------------------|
| LEADING EDGE |           |                     |            |            |           |                      |             |            |                                                                                                                                                                                                     |
| Bony fish    | Temperate | North-east Atlantic | 1000000    | 1966       | 30        | 536.1                | Yes         | No         | Swaby, S.E. and G.W. Potts 1999. The sailfin dory, a first British record. <i>Journal of Fish Biology</i> 54: 1338-1340                                                                             |
| Bony fish    | Temperate | North Sea           | 100000     | 1969       | 40        | 65.6                 | Yes         | Yes        | van Hal, R., K. Smits and A.D. Rijnsdorp 2010. How climate warming impacts the distribution and abundance of two small flatfish species in the North Sea. <i>Journal of Sea Research</i> 64: 76-84. |
| Bony fish    | Temperate | North Sea           | 100000     | 1969       | 40        | 95.9                 | Yes         | Yes        | van Hal, R., K. Smits and A.D. Rijnsdorp 2010. How climate warming impacts the distribution and abundance of two small flatfish species in the North Sea. <i>Journal of Sea Research</i> 64: 76-84. |
| Bony fish    | Temperate | Mediterranean Sea   | 100000     | 1950       | 55        | 40.0                 | No          | Yes        | Sabates, A., P. Martin, J. Lloret and V. Raya. 2006. Sea warming and fish distribution: the case of the small pelagic fish, <i>Sardinella</i>                                                       |

|                         |             |                     |        |      |    |       |     |     |                                                                                                                                                                                                     |
|-------------------------|-------------|---------------------|--------|------|----|-------|-----|-----|-----------------------------------------------------------------------------------------------------------------------------------------------------------------------------------------------------|
|                         |             |                     |        |      |    |       |     |     | aurita, in the western Mediterranean. <i>Global Change Biology</i> . 12: 2209-2219                                                                                                                  |
| Benthic invert. (other) | Temperate   | North-east Atlantic | 10000  | 1923 | 84 | 36.0  | Yes | Yes | Wetthey, D. S. and S. A. Woodin. 2008. Ecological hindcasting of biogeographic responses to climate change in the European intertidal zone. <i>Hydrobiologia</i> 606:139-151.                       |
| Benthic molluscs        | Subtropical | South-east Pacific  | 100000 | 1962 | 39 | 55.1  | Yes | No  | Rivadeneira, M.M. and Fernandez, M. 2005 Shifts in southern endpoints of distribution in rocky intertidal species along the south-eastern Pacific coast. <i>Journal of Biogeography</i> 32: 203-209 |
| Benthic molluscs        | Subtropical | South-east Pacific  | 100000 | 1975 | 26 | 137.7 | Yes | No  | Rivadeneira, M.M. and Fernandez, M. 2005 Shifts in southern endpoints of distribution in rocky intertidal species along the south-eastern Pacific coast. <i>Journal of Biogeography</i> 32: 203-209 |
| Benthic molluscs        | Subtropical | South-east Pacific  | 100000 | 1947 | 54 | 0     | Yes | No  | Rivadeneira, M.M. and Fernandez, M. 2005 Shifts in southern endpoints of distribution in rocky intertidal species along the south-eastern Pacific coast. <i>Journal of Biogeography</i> 32: 203-209 |
| Benthic molluscs        | Subtropical | South-east Pacific  | 100000 | 1949 | 52 | 0     | Yes | No  | Rivadeneira, M.M. and Fernandez, M. 2005 Shifts in southern endpoints of distribution in rocky intertidal species along the south-eastern Pacific coast. <i>Journal of Biogeography</i> 32: 203-209 |
| Benthic molluscs        | Subtropical | South-east Pacific  | 100000 | 1958 | 43 | 0     | Yes | No  | Rivadeneira, M.M. and Fernandez, M. 2005 Shifts in southern endpoints of distribution in rocky intertidal species along the south-eastern Pacific coast. <i>Journal of Biogeography</i> 32: 203-209 |
| Benthic molluscs        | Subtropical | South-east Pacific  | 100000 | 1962 | 39 | 0     | Yes | No  | Rivadeneira, M.M. and Fernandez, M. 2005 Shifts in southern endpoints of distribution in                                                                                                            |

|                   |             |                    |        |      |    |        |     |    |  |                                                                                                                                                                                                                                     |
|-------------------|-------------|--------------------|--------|------|----|--------|-----|----|--|-------------------------------------------------------------------------------------------------------------------------------------------------------------------------------------------------------------------------------------|
|                   |             |                    |        |      |    |        |     |    |  | rocky intertidal species along the south-eastern Pacific coast. Journal of Biogeography 32: 203-209                                                                                                                                 |
| Benthic molluscs  | Subtropical | South-east Pacific | 100000 | 1975 | 26 | 0      | Yes | No |  | Rivadeneira, M.M. and Fernandez, M. 2005 Shifts in southern endpoints of distribution in rocky intertidal species along the south-eastern Pacific coast. Journal of Biogeography 32: 203-209                                        |
| Benthic molluscs  | Subtropical | South-east Pacific | 100000 | 1947 | 54 | -155.4 | Yes | No |  | Rivadeneira, M.M. and Fernandez, M. 2005 Shifts in southern endpoints of distribution in rocky intertidal species along the south-eastern Pacific coast. Journal of Biogeography 32: 203-209                                        |
| Benthic molluscs  | Subtropical | South-east Pacific | 100000 | 1962 | 39 | -138.7 | Yes | No |  | Rivadeneira, M.M. and Fernandez, M. 2005 Shifts in southern endpoints of distribution in rocky intertidal species along the south-eastern Pacific coast. Journal of Biogeography 32: 203-209                                        |
| Benthic molluscs  | Subtropical | South-east Pacific | 100000 | 1962 | 39 | -96.7  | Yes | No |  | Rivadeneira, M.M. and Fernandez, M. 2005 Shifts in southern endpoints of distribution in rocky intertidal species along the south-eastern Pacific coast. Journal of Biogeography 32: 203-209                                        |
| Benthic molluscs  | Subtropical | South-east Pacific | 100000 | 1949 | 52 | -71.7  | Yes | No |  | Rivadeneira, M.M. and Fernandez, M. 2005 Shifts in southern endpoints of distribution in rocky intertidal species along the south-eastern Pacific coast. Journal of Biogeography 32: 203-209                                        |
| Benthic crustacea | Temperate   | English Channel    | 100000 | 1964 | 38 | 32.4   | Yes | No |  | Herbert, R. J. H., S. J. Hawkins, M. Shearer, and A. J. Southward. 2003. Range extension and reproduction of the barnacle <i>Balanus perforatus</i> in the eastern English Channel. Journal of the Marine Biological Association of |



|                   |           |                     |        |      |    |       |     |    |  |                                                                                                                                                                                                                                                                         |
|-------------------|-----------|---------------------|--------|------|----|-------|-----|----|--|-------------------------------------------------------------------------------------------------------------------------------------------------------------------------------------------------------------------------------------------------------------------------|
|                   |           |                     |        |      |    |       |     |    |  | the United Kingdom 83:73-82.                                                                                                                                                                                                                                            |
| Benthic crustacea | Temperate | English Channel     | 100000 | 1964 | 38 | 50.0  | Yes | No |  | Herbert, R. J. H., S. J. Hawkins, M. Sheader, and A. J. Southward. 2003. Range extension and reproduction of the barnacle <i>Balanus perforatus</i> in the eastern English Channel. <i>Journal of the Marine Biological Association of the United Kingdom</i> 83:73-82. |
| Benthic crustacea | Temperate | English Channel     | 100000 | 1955 | 50 | 4.4   | Yes | No |  | Herbert, R. J. H., A. J. Southward, M. Sheader, and S. J. Hawkins 2007 Influence of recruitment and temperature on the distribution of intertidal barnacles in the English Channel. <i>Journal of the Marine Biological Association of the United Kingdom</i> 87: 487-  |
| Benthic crustacea | Temperate | English Channel     | 100000 | 1955 | 47 | 21.7  | Yes | No |  | Herbert, R. J. H., A. J. Southward, M. Sheader, and S. J. Hawkins 2007 Influence of recruitment and temperature on the distribution of intertidal barnacles in the English Channel. <i>Journal of the Marine Biological Association of the United Kingdom</i> 87: 487-  |
| Benthic algae     | Temperate | North-east Atlantic | 10000  | 1960 | 47 | 61.1  | Yes | No |  | Lima, F. P., P. A. Ribeiro, N. Queiroz, S. J. Hawkins, and A. M. Santos. 2007. Do distributional shifts of northern and southern species of algae match the warming pattern? <i>Global Change Biology</i> 13: 2592-2605.                                                |
| Benthic algae     | Temperate | North-east Atlantic | 10000  | 1960 | 47 | 12.6  | Yes | No |  | Lima, F. P., P. A. Ribeiro, N. Queiroz, S. J. Hawkins, and A. M. Santos. 2007. Do distributional shifts of northern and southern species of algae match the warming pattern? <i>Global Change Biology</i> 13: 2592-2605.                                                |
| Benthic algae     | Temperate | North-east Atlantic | 10000  | 1960 | 47 | 101.1 | Yes | No |  | Lima, F. P., P. A. Ribeiro, N. Queiroz, S. J. Hawkins, and A. M. Santos. 2007. Do                                                                                                                                                                                       |

|               |             |                     |       |      |    |       |     |    |  |                                                                                                                                                                                                                   |
|---------------|-------------|---------------------|-------|------|----|-------|-----|----|--|-------------------------------------------------------------------------------------------------------------------------------------------------------------------------------------------------------------------|
|               |             |                     |       |      |    |       |     |    |  | distributional shifts of northern and southern species of algae match the warming pattern? Global Change Biology 13: 2592-2605.                                                                                   |
| Benthic algae | Temperate   | North-east Atlantic | 10000 | 1960 | 47 | 57.2  | Yes | No |  | Lima, F. P., P. A. Ribeiro, N. Queiroz, S. J. Hawkins, and A. M. Santos. 2007. Do distributional shifts of northern and southern species of algae match the warming pattern? Global Change Biology 13: 2592-2605. |
| Benthic algae | Temperate   | North-east Atlantic | 10000 | 1960 | 47 | 68.1  | Yes | No |  | Lima, F. P., P. A. Ribeiro, N. Queiroz, S. J. Hawkins, and A. M. Santos. 2007. Do distributional shifts of northern and southern species of algae match the warming pattern? Global Change Biology 13: 2592-2605. |
| Benthic algae | Subtropical | North-east Atlantic | 10000 | 1960 | 47 | 39.8  | Yes | No |  | Lima, F. P., P. A. Ribeiro, N. Queiroz, S. J. Hawkins, and A. M. Santos. 2007. Do distributional shifts of northern and southern species of algae match the warming pattern? Global Change Biology 13: 2592-2605. |
| Benthic algae | Subtropical | North-east Atlantic | 10000 | 1960 | 47 | 126.2 | Yes | No |  | Lima, F. P., P. A. Ribeiro, N. Queiroz, S. J. Hawkins, and A. M. Santos. 2007. Do distributional shifts of northern and southern species of algae match the warming pattern? Global Change Biology 13: 2592-2605. |
| Benthic algae | Subtropical | North-east Atlantic | 10000 | 1960 | 47 | 41.9  | Yes | No |  | Lima, F. P., P. A. Ribeiro, N. Queiroz, S. J. Hawkins, and A. M. Santos. 2007. Do distributional shifts of northern and southern species of algae match the warming pattern? Global Change Biology 13: 2592-2605. |
| Benthic algae | Temperate   | North-east Atlantic | 10000 | 1960 | 47 | 0     | Yes | No |  | Lima, F. P., P. A. Ribeiro, N. Queiroz, S. J. Hawkins, and A. M. Santos. 2007. Do distributional shifts of northern and southern species of algae match the warming pattern? Global Change Biology 13: 2592-2605. |

|                  |             |                     |         |      |     |       |     |    |                                                                                                                                                                                                                                                                              |
|------------------|-------------|---------------------|---------|------|-----|-------|-----|----|------------------------------------------------------------------------------------------------------------------------------------------------------------------------------------------------------------------------------------------------------------------------------|
| Benthic algae    | Subtropical | North-east Atlantic | 10000   | 1960 | 47  | 0     | Yes | No | Lima, F. P., P. A. Ribeiro, N. Queiroz, S. J. Hawkins, and A. M. Santos. 2007. Do distributional shifts of northern and southern species of algae match the warming pattern? <i>Global Change Biology</i> 13: 2592-2605.                                                     |
| Benthic algae    | Temperate   | North-east Atlantic | 10000   | 1960 | 47  | -1.1  | Yes | No | Lima, F. P., P. A. Ribeiro, N. Queiroz, S. J. Hawkins, and A. M. Santos. 2007. Do distributional shifts of northern and southern species of algae match the warming pattern? <i>Global Change Biology</i> 13: 2592-2605.                                                     |
| Benthic algae    | Subtropical | North-east Atlantic | 10000   | 1960 | 47  | 6.0   | Yes | No | Lima, F. P., P. A. Ribeiro, N. Queiroz, S. J. Hawkins, and A. M. Santos. 2007. Do distributional shifts of northern and southern species of algae match the warming pattern? <i>Global Change Biology</i> 13: 2592-2605.                                                     |
| Benthic algae    | Subtropical | North-east Atlantic | 10000   | 1960 | 47  | 4.3   | Yes | No | Lima, F. P., P. A. Ribeiro, N. Queiroz, S. J. Hawkins, and A. M. Santos. 2007. Do distributional shifts of northern and southern species of algae match the warming pattern? <i>Global Change Biology</i> 13: 2592-2605.                                                     |
| Benthic molluscs | Temperate   | North-east Atlantic | 1000    | 1955 | 51  | 250.0 | Yes | No | Lima, F. P., N. Queiroz, P. A. Ribeiro, S. J. Hawkins, and A. M. Santos. 2006. Recent changes in the distribution of a marine gastropod, <i>Patella rustica</i> Linnaeus, 1758, and their relationship to unusual climatic events. <i>Journal of Biogeography</i> 33:812-822 |
| Benthic molluscs | Subtropical | North-east Atlantic | 1000    | 1955 | 51  | 0     | Yes | No | Lima, F. P., N. Queiroz, P. A. Ribeiro, S. J. Hawkins, and A. M. Santos. 2006. Recent changes in the distribution of a marine gastropod, <i>Patella rustica</i> Linnaeus, 1758, and their relationship to unusual climatic events. <i>Journal of Biogeography</i> 33:812-822 |
| Bony fish        | Subtropical | Mediterran          | 1000000 | 1900 | 107 | 150.0 | No  | No | Ben Rais Lasram, F. and D. Mouillot. 2009.                                                                                                                                                                                                                                   |

|                         |             |                     |         |      |    |       |     |    |  |                                                                                                                                                                                                                                                                        |
|-------------------------|-------------|---------------------|---------|------|----|-------|-----|----|--|------------------------------------------------------------------------------------------------------------------------------------------------------------------------------------------------------------------------------------------------------------------------|
|                         |             | ean Sea             | 0       |      |    |       |     |    |  | Increasing southern invasion enhances congruence between endemic and exotic Mediterranean fish fauna. <i>Biological Invasions</i> 11:697-711                                                                                                                           |
| Phytoplankton           | Temperate   | Southern Ocean      | 100000  | 1983 | 24 | 693.8 | No  | No |  | Cubillos, J.C., et al. 2007. Calcification morphotypes of the coccolithophorid <i>Emiliania huxleyi</i> in the Southern Ocean: changes in 2001 to 2006 compared to historical data. <i>Marine Ecology Progress Series</i> 348: 47-54                                   |
| Benthic crustacea       | Subtropical | North-east Pacific  | 1000    | 1970 | 27 | 119.0 | No  | No |  | Dawson, M. N., R. K. Grosberg, Y. E. Stuart, and E. Sanford. 2010. Population genetic analysis of a recent range expansion: mechanisms regulating the poleward range limit in the volcano barnacle <i>Tetraclita rubescens</i> . <i>Molecular Ecology</i> 19:1585-1605 |
| Benthic invert. (other) | Temperate   | North-east Atlantic | 1000000 | 1967 | 39 | 56.0  | Yes | No |  | Edward, D.A., J.E. Blyth, R. McKee and A. Simon Gilburn. 2007. Change in the distribution of a member of the strand line community: the seaweed fly (Diptera: Coelopidae). <i>Ecological Entomology</i> 32: 741_746                                                    |
| Benthic algae           | Temperate   | English Channel     | 100000  | 1936 | 68 | 77.8  | Yes | No |  | Mieszkowska, N., et al. 2006. Changes in the range of some common rocky shore species in Britain - a response to climate change? <i>Hydrobiologia</i> 555:241-251.                                                                                                     |
| Benthic molluscs        | Temperate   | English Channel     | 100000  | 1952 | 52 | 27.8  | Yes | No |  | Mieszkowska, N., et al. 2006. Changes in the range of some common rocky shore species in Britain - a response to climate change? <i>Hydrobiologia</i> 555:241-251.                                                                                                     |
| Benthic molluscs        | Temperate   | North Sea           | 100000  | 1952 | 52 | 28.9  | No  | No |  | Mieszkowska, N., et al. 2006. Changes in the range of some common rocky shore species in Britain - a response to climate change?                                                                                                                                       |

|                            |             |                     |         |      |    |       |    |     |                                                                                                                                                                                                                                                                          |
|----------------------------|-------------|---------------------|---------|------|----|-------|----|-----|--------------------------------------------------------------------------------------------------------------------------------------------------------------------------------------------------------------------------------------------------------------------------|
|                            |             |                     |         |      |    |       |    |     | Hydrobiologia 555:241-251.                                                                                                                                                                                                                                               |
| Benthic invert.<br>(other) | Temperate   | Bass Strait         | 1000    | 1960 | 46 | 160.0 | No | Yes | Ling, S. D., C. R. Johnson, K. Ridgway, A. J. Hobday, and M. Haddon. 2009. Climate-driven range extension of a sea urchin: inferring future trends by analysis of recent population dynamics. <i>Global Change Biology</i> 15:719-731.                                   |
| Benthic molluscs           | Subtropical | North-east Pacific  | 100     | 1966 | 31 | 53.1  | No | No  | Sagarin, R. D., J. P. Barry, S. E. Gilman, and C. H. Baxter. 1999. Climate-related change in an intertidal community over short and long time scales. <i>Ecological Monographs</i> 69:465-490                                                                            |
| Benthic molluscs           | Temperate   | North-east Pacific  | 100     | 1954 | 40 | 151.8 | No | No  | Sagarin, R. D., J. P. Barry, S. E. Gilman, and C. H. Baxter. 1999. Climate-related change in an intertidal community over short and long time scales. <i>Ecological Monographs</i> 69:465-490                                                                            |
| Zooplankton                | Temperate   | North-east Atlantic | 1000000 | 1978 | 23 | 157.0 | No | Yes | Lindley JA, Daykin S. 2005. Variations in the distributions of <i>Centropages chierchiae</i> and <i>Temora stylifera</i> (Copepoda: Calanoida) in the north-eastern Atlantic Ocean and western European shelf waters. <i>ICES Journal of Marine Science</i> 62: 869-877. |
| Zooplankton                | Temperate   | North-east Atlantic | 1000000 | 1978 | 23 | 157.0 | No | Yes | Lindley JA, Daykin S. 2005. Variations in the distributions of <i>Centropages chierchiae</i> and <i>Temora stylifera</i> (Copepoda: Calanoida) in the north-eastern Atlantic Ocean and western European shelf waters. <i>ICES Journal of Marine Science</i> 62: 869-877. |
| Phytoplankton              | Temperate   | North-east Atlantic | 1000000 | 1958 | 47 | 310.0 | No | No  | Hays, G.C., A.J. Richardson and C. Robinson. 2005. Climate change and marine plankton. <i>Trends in Ecology and Evolution</i> 20: 337-344                                                                                                                                |
| Zooplankton                | Temperate   | North-east Atlantic | 1E+08   | 1958 | 48 | 231.6 | No | No  | Beaugrand, G., C. Luczak and M. Edwards. 2009. Rapid biogeographical plankton shifts in the North Atlantic Ocean. <i>Global Change</i>                                                                                                                                   |

|                    |             |                     |       |      |    |       |     |    |                                                                                                                                                                                            |
|--------------------|-------------|---------------------|-------|------|----|-------|-----|----|--------------------------------------------------------------------------------------------------------------------------------------------------------------------------------------------|
|                    |             |                     |       |      |    |       |     |    | Biology 15: 1790-1803                                                                                                                                                                      |
| Zooplankton        | Temperate   | North-east Atlantic | 1E+08 | 1958 | 48 | 217.5 | No  | No | Beaugrand, G., C. Luczak and M. Edwards. 2009. Rapid biogeographical plankton shifts in the North Atlantic Ocean. Global Change Biology 15: 1790-1803                                      |
| Zooplankton        | Temperate   | North-east Atlantic | 1E+08 | 1958 | 48 | 138.8 | No  | No | Beaugrand, G., C. Luczak and M. Edwards. 2009. Rapid biogeographical plankton shifts in the North Atlantic Ocean. Global Change Biology 15: 1790-1803                                      |
| Zooplankton        | Temperate   | North-east Atlantic | 1E+08 | 1958 | 48 | 46.3  | No  | No | Beaugrand, G., C. Luczak and M. Edwards. 2009. Rapid biogeographical plankton shifts in the North Atlantic Ocean. Global Change Biology 15: 1790-1803                                      |
| Zooplankton        | Temperate   | North-east Atlantic | 1E+08 | 1958 | 48 | 46.3  | Yes | No | Beaugrand, G., C. Luczak and M. Edwards. 2009. Rapid biogeographical plankton shifts in the North Atlantic Ocean. Global Change Biology 15: 1790-1803                                      |
| Benthic cnidarians | Subtropical | Japan Sea           | 1000  | 1931 | 80 | 130.0 | Yes | No | Yamano, H. K. Sugihara and K. Nomura. 2011. Rapid poleward range expansion of tropical reef corals in response to rising sea surface temperatures. Geophysical Research Letters 38: L04641 |
| Benthic cnidarians | Subtropical | North-west Pacific  | 10000 | 1931 | 80 | 40.0  | Yes | No | Yamano, H. K. Sugihara and K. Nomura. 2011. Rapid poleward range expansion of tropical reef corals in response to rising sea surface temperatures. Geophysical Research Letters 38: L04641 |
| Benthic cnidarians | Subtropical | Japan Sea           | 1000  | 1931 | 80 | 140.0 | Yes | No | Yamano, H. K. Sugihara and K. Nomura. 2011. Rapid poleward range expansion of tropical reef corals in response to rising sea surface temperatures. Geophysical Research Letters 38: L04641 |
| Benthic            | Subtropical | North-west          | 10000 | 1931 | 80 | 50.0  | Yes | No | Yamano, H. K. Sugihara and K. Nomura. 2011.                                                                                                                                                |

|                    |             |                    |       |      |    |      |     |    |  |                                                                                                                                                                                            |
|--------------------|-------------|--------------------|-------|------|----|------|-----|----|--|--------------------------------------------------------------------------------------------------------------------------------------------------------------------------------------------|
| cnidarians         |             | Pacific            |       |      |    |      |     |    |  | Rapid poleward range expansion of tropical reef corals in response to rising sea surface temperatures. Geophysical Research Letters 38: L04641                                             |
| Benthic cnidarians | Subtropical | Japan Sea          | 1000  | 1931 | 80 | 80.0 | Yes | No |  | Yamano, H. K. Sugihara and K. Nomura. 2011. Rapid poleward range expansion of tropical reef corals in response to rising sea surface temperatures. Geophysical Research Letters 38: L04641 |
| Benthic cnidarians | Subtropical | North-west Pacific | 10000 | 1931 | 80 | 50.0 | Yes | No |  | Yamano, H. K. Sugihara and K. Nomura. 2011. Rapid poleward range expansion of tropical reef corals in response to rising sea surface temperatures. Geophysical Research Letters 38: L04641 |
| Benthic cnidarians | Subtropical | Japan Sea          | 1000  | 1931 | 80 | 50.0 | Yes | No |  | Yamano, H. K. Sugihara and K. Nomura. 2011. Rapid poleward range expansion of tropical reef corals in response to rising sea surface temperatures. Geophysical Research Letters 38: L04641 |
| Benthic cnidarians | Subtropical | North-west Pacific | 10000 | 1931 | 80 | 0    | Yes | No |  | Yamano, H. K. Sugihara and K. Nomura. 2011. Rapid poleward range expansion of tropical reef corals in response to rising sea surface temperatures. Geophysical Research Letters 38: L04641 |
| Benthic cnidarians | Subtropical | North-west Pacific | 10000 | 1931 | 80 | 0    | Yes | No |  | Yamano, H. K. Sugihara and K. Nomura. 2011. Rapid poleward range expansion of tropical reef corals in response to rising sea surface temperatures. Geophysical Research Letters 38: L04641 |
| Benthic cnidarians | Subtropical | Japan Sea          | 1000  | 1931 | 80 | 0    | Yes | No |  | Yamano, H. K. Sugihara and K. Nomura. 2011. Rapid poleward range expansion of tropical reef corals in response to rising sea surface temperatures. Geophysical Research Letters            |

|                    |             |                    |       |      |    |   |     |    |                                                                                                                                                                                            |
|--------------------|-------------|--------------------|-------|------|----|---|-----|----|--------------------------------------------------------------------------------------------------------------------------------------------------------------------------------------------|
|                    |             |                    |       |      |    |   |     |    | 38: L04641                                                                                                                                                                                 |
| Benthic cnidarians | Subtropical | North-west Pacific | 10000 | 1931 | 80 | 0 | Yes | No | Yamano, H. K. Sugihara and K. Nomura. 2011. Rapid poleward range expansion of tropical reef corals in response to rising sea surface temperatures. Geophysical Research Letters 38: L04641 |
| Benthic cnidarians | Subtropical | Japan Sea          | 1000  | 1931 | 80 | 0 | Yes | No | Yamano, H. K. Sugihara and K. Nomura. 2011. Rapid poleward range expansion of tropical reef corals in response to rising sea surface temperatures. Geophysical Research Letters 38: L04641 |
| Benthic cnidarians | Subtropical | North-west Pacific | 10000 | 1931 | 80 | 0 | Yes | No | Yamano, H. K. Sugihara and K. Nomura. 2011. Rapid poleward range expansion of tropical reef corals in response to rising sea surface temperatures. Geophysical Research Letters 38: L04641 |
| Benthic cnidarians | Subtropical | Japan Sea          | 1000  | 1931 | 80 | 0 | Yes | No | Yamano, H. K. Sugihara and K. Nomura. 2011. Rapid poleward range expansion of tropical reef corals in response to rising sea surface temperatures. Geophysical Research Letters 38: L04641 |
| Benthic cnidarians | Subtropical | North-west Pacific | 10000 | 1931 | 80 | 0 | Yes | No | Yamano, H. K. Sugihara and K. Nomura. 2011. Rapid poleward range expansion of tropical reef corals in response to rising sea surface temperatures. Geophysical Research Letters 38: L04641 |
| Benthic cnidarians | Subtropical | Japan Sea          | 1000  | 1931 | 80 | 0 | Yes | No | Yamano, H. K. Sugihara and K. Nomura. 2011. Rapid poleward range expansion of tropical reef corals in response to rising sea surface temperatures. Geophysical Research Letters 38: L04641 |
| Benthic cnidarians | Subtropical | North-west Pacific | 10000 | 1931 | 80 | 0 | Yes | No | Yamano, H. K. Sugihara and K. Nomura. 2011. Rapid poleward range expansion of tropical                                                                                                     |



|                    |             |                     |         |      |    |       |     |     |  |                                                                                                                                                                                                                                                                                          |
|--------------------|-------------|---------------------|---------|------|----|-------|-----|-----|--|------------------------------------------------------------------------------------------------------------------------------------------------------------------------------------------------------------------------------------------------------------------------------------------|
|                    |             |                     |         |      |    |       |     |     |  | reef corals in response to rising sea surface temperatures. Geophysical Research Letters 38: L04641                                                                                                                                                                                      |
| Benthic cnidarians | Subtropical | Japan Sea           | 1000    | 1931 | 80 | 0     | Yes | No  |  | Yamano, H. K. Sugihara and K. Nomura. 2011. Rapid poleward range expansion of tropical reef corals in response to rising sea surface temperatures. Geophysical Research Letters 38: L04641                                                                                               |
| Phytoplankton      | Subtropical | Tasman Sea          | 10000   | 1950 | 56 | 406.0 | Yes | No  |  | Hallegraeff G., W. Hosja, R. Knuckey and C. Wilkinson 2008. Recent range expansion of the red-tide dinoflagellate Noctiluca scintillans in Australian coastal waters. IOC-UNESCO Algae Newsletter 38:10-11.                                                                              |
| Benthic molluscs   | Temperate   | North-east Atlantic | 1000    | 1963 | 42 | 18.0  | Yes | No  |  | Mieszkowska, N., S. J. Hawkins, M. T. Burrows, and M. A. Kendall. 2007. Long-term changes in the geographic distribution and population structures of <i>Osilinus lineatus</i> (Gastropoda : Trochidae) in Britain and Ireland. Journal of the Marine Biological Association 87: 537-545 |
| Benthic molluscs   | Temperate   | North-east Atlantic | 1000    | 1971 | 33 | 3.0   | Yes | No  |  | Mieszkowska, N., S. J. Hawkins, M. T. Burrows, and M. A. Kendall. 2007. Long-term changes in the geographic distribution and population structures of <i>Osilinus lineatus</i> (Gastropoda : Trochidae) in Britain and Ireland. Journal of the Marine Biological Association 87: 537-545 |
| Benthic crustacea  | Temperate   | Bering Sea          | 1000000 | 1982 | 25 | -6.0  | Yes | Yes |  | Mueter, F.J. and M.A. Litzow. 2008. Sea ice retreat alters the biogeography of the bering sea continental shelf. Ecological Applications 18: 309-302                                                                                                                                     |
| Benthic crustacea  | Temperate   | Bering Sea          | 1000000 | 1982 | 25 | -4.4  | Yes | Yes |  | Mueter, F.J. and M.A. Litzow. 2008. Sea ice retreat alters the biogeography of the bering sea continental shelf. Ecological Applications 18: 309-302                                                                                                                                     |

|                   |           |                     |         |      |    |       |     |     |                                                                                                                                                       |
|-------------------|-----------|---------------------|---------|------|----|-------|-----|-----|-------------------------------------------------------------------------------------------------------------------------------------------------------|
| Benthic crustacea | Temperate | Bering Sea          | 1000000 | 1982 | 25 | -0.8  | Yes | Yes | Mueter, F.J. and M.A. Litzow. 2008. Sea ice retreat alters the biogeography of the bering sea continental shelf. Ecological Applications 18: 309-302  |
| Benthic crustacea | Temperate | Bering Sea          | 1000000 | 1982 | 25 | 5.2   | Yes | Yes | Mueter, F.J. and M.A. Litzow. 2008. Sea ice retreat alters the biogeography of the bering sea continental shelf. Ecological Applications 18: 309-302  |
| Benthic crustacea | Temperate | Bering Sea          | 1000000 | 1982 | 25 | 5.6   | Yes | Yes | Mueter, F.J. and M.A. Litzow. 2008. Sea ice retreat alters the biogeography of the bering sea continental shelf. Ecological Applications 18: 309-302  |
| Benthic crustacea | Temperate | Bering Sea          | 1000000 | 1982 | 25 | 10.4  | No  | Yes | Mueter, F.J. and M.A. Litzow. 2008. Sea ice retreat alters the biogeography of the bering sea continental shelf. Ecological Applications 18: 309-302  |
| Bony fish         | Temperate | North-east Atlantic | 1000000 | 1966 | 30 | 685.0 | No  | No  | Quero, J. 1998. Changes in the Euro-Atlantic fish species composition resulting from fishing and ocean warming. Italian Journal of Zoology 65:493-499 |
| Bony fish         | Temperate | North-east Atlantic | 1000000 | 1963 | 33 | 472.0 | No  | No  | Quero, J. 1998. Changes in the Euro-Atlantic fish species composition resulting from fishing and ocean warming. Italian Journal of Zoology 65:493-499 |
| Bony fish         | Temperate | North-east Atlantic | 1000000 | 1960 | 36 | 432.0 | No  | No  | Quero, J. 1998. Changes in the Euro-Atlantic fish species composition resulting from fishing and ocean warming. Italian Journal of Zoology 65:493-499 |
| Bony fish         | Temperate | North-east Atlantic | 1000000 | 1960 | 36 | 541.0 | Yes | No  | Quero, J. 1998. Changes in the Euro-Atlantic fish species composition resulting from fishing and ocean warming. Italian Journal of Zoology 65:493-499 |
| Benthic           | Tropical  | South-west          | 1000    | 1955 | 54 | 0     | Yes | No  | Poloczanska, E.S., et al. 2011. Little change in                                                                                                      |

|                  |             |                    |      |      |    |      |     |    |  |                                                                                                                                                                                                                                   |
|------------------|-------------|--------------------|------|------|----|------|-----|----|--|-----------------------------------------------------------------------------------------------------------------------------------------------------------------------------------------------------------------------------------|
| molluscs         |             | Pacific            |      |      |    |      |     |    |  | the distribution of rocky shore faunal communities on the East Australian coast after 50 years of rapid warming. Journal of Experimental Marine Biology and Ecology 400: 145-154                                                  |
| Benthic molluscs | Tropical    | South-west Pacific | 1000 | 1955 | 54 | 11.1 | Yes | No |  | Poloczanska, E.S., et al. 2011. Little change in the distribution of rocky shore faunal communities on the East Australian coast after 50 years of rapid warming. Journal of Experimental Marine Biology and Ecology 400: 145-154 |
| Benthic molluscs | Tropical    | South-west Pacific | 1000 | 1955 | 54 | 0    | Yes | No |  | Poloczanska, E.S., et al. 2011. Little change in the distribution of rocky shore faunal communities on the East Australian coast after 50 years of rapid warming. Journal of Experimental Marine Biology and Ecology 400: 145-154 |
| Benthic molluscs | Subtropical | South-west Pacific | 1000 | 1955 | 54 | 15.8 | Yes | No |  | Poloczanska, E.S., et al. 2011. Little change in the distribution of rocky shore faunal communities on the East Australian coast after 50 years of rapid warming. Journal of Experimental Marine Biology and Ecology 400: 145-154 |
| Benthic molluscs | Subtropical | South-west Pacific | 1000 | 1955 | 54 | 93.5 | Yes | No |  | Poloczanska, E.S., et al. 2011. Little change in the distribution of rocky shore faunal communities on the East Australian coast after 50 years of rapid warming. Journal of Experimental Marine Biology and Ecology 400: 145-154 |
| Benthic molluscs | Subtropical | South-west Pacific | 1000 | 1955 | 54 | 24.3 | Yes | No |  | Poloczanska, E.S., et al. 2011. Little change in the distribution of rocky shore faunal communities on the East Australian coast after 50 years of rapid warming. Journal of                                                      |

|                   |             |                    |      |      |    |       |     |    |                                                                                                                                                                                                                                   |
|-------------------|-------------|--------------------|------|------|----|-------|-----|----|-----------------------------------------------------------------------------------------------------------------------------------------------------------------------------------------------------------------------------------|
|                   |             |                    |      |      |    |       |     |    | Experimental Marine Biology and Ecology 400: 145-154                                                                                                                                                                              |
| Benthic molluscs  | Subtropical | South-west Pacific | 1000 | 1955 | 54 | -68.7 | Yes | No | Poloczanska, E.S., et al. 2011. Little change in the distribution of rocky shore faunal communities on the East Australian coast after 50 years of rapid warming. Journal of Experimental Marine Biology and Ecology 400: 145-154 |
| Benthic molluscs  | Subtropical | South-west Pacific | 1000 | 1955 | 54 | 33.2  | Yes | No | Poloczanska, E.S., et al. 2011. Little change in the distribution of rocky shore faunal communities on the East Australian coast after 50 years of rapid warming. Journal of Experimental Marine Biology and Ecology 400: 145-154 |
| Benthic molluscs  | Subtropical | South-west Pacific | 1000 | 1955 | 54 | -17.8 | Yes | No | Poloczanska, E.S., et al. 2011. Little change in the distribution of rocky shore faunal communities on the East Australian coast after 50 years of rapid warming. Journal of Experimental Marine Biology and Ecology 400: 145-154 |
| Benthic crustacea | Subtropical | South-west Pacific | 1000 | 1955 | 54 | 126.7 | Yes | No | Poloczanska, E.S., et al. 2011. Little change in the distribution of rocky shore faunal communities on the East Australian coast after 50 years of rapid warming. Journal of Experimental Marine Biology and Ecology 400: 145-154 |
| Benthic crustacea | Subtropical | South-west Pacific | 1000 | 1955 | 54 | 131.5 | Yes | No | Poloczanska, E.S., et al. 2011. Little change in the distribution of rocky shore faunal communities on the East Australian coast after 50 years of rapid warming. Journal of Experimental Marine Biology and Ecology 400: 145-154 |
| Benthic           | Temperate   | Tasman Sea         | 1000 | 1955 | 54 | -3.7  | Yes | No | Pitt N, Poloczanska E.S. and Hobday A.J. 2010                                                                                                                                                                                     |

|                         |           |            |      |      |    |      |     |    |  |                                                                                                                                                      |
|-------------------------|-----------|------------|------|------|----|------|-----|----|--|------------------------------------------------------------------------------------------------------------------------------------------------------|
| molluscs                |           |            |      |      |    |      |     |    |  | Climate-driven range changes in Tasmanian intertidal fauna. Marine and Freshwater Research 61: 963-970                                               |
| Benthic invert. (other) | Temperate | Tasman Sea | 1000 | 1955 | 54 | 3.7  | Yes | No |  | Pitt N, Poloczanska E.S. and Hobday A.J. 2010 Climate-driven range changes in Tasmanian intertidal fauna. Marine and Freshwater Research 61: 963-970 |
| Benthic crustacea       | Temperate | Tasman Sea | 1000 | 1955 | 54 | 3.7  | Yes | No |  | Pitt N, Poloczanska E.S. and Hobday A.J. 2010 Climate-driven range changes in Tasmanian intertidal fauna. Marine and Freshwater Research 61: 963-970 |
| Benthic crustacea       | Temperate | Tasman Sea | 1000 | 1955 | 54 | 12.9 | Yes | No |  | Pitt N, Poloczanska E.S. and Hobday A.J. 2010 Climate-driven range changes in Tasmanian intertidal fauna. Marine and Freshwater Research 61: 963-970 |
| Benthic crustacea       | Temperate | Tasman Sea | 1000 | 1955 | 54 | 46.3 | Yes | No |  | Pitt N, Poloczanska E.S. and Hobday A.J. 2010 Climate-driven range changes in Tasmanian intertidal fauna. Marine and Freshwater Research 61: 963-970 |
| Benthic molluscs        | Temperate | Tasman Sea | 1000 | 1955 | 54 | 16.7 | Yes | No |  | Pitt N, Poloczanska E.S. and Hobday A.J. 2010 Climate-driven range changes in Tasmanian intertidal fauna. Marine and Freshwater Research 61: 963-970 |
| Benthic molluscs        | Temperate | Tasman Sea | 1000 | 1955 | 54 | 42.6 | Yes | No |  | Pitt N, Poloczanska E.S. and Hobday A.J. 2010 Climate-driven range changes in Tasmanian intertidal fauna. Marine and Freshwater Research 61: 963-970 |
| Benthic molluscs        | Temperate | Tasman Sea | 1000 | 1955 | 54 | 23.1 | Yes | No |  | Pitt N, Poloczanska E.S. and Hobday A.J. 2010 Climate-driven range changes in Tasmanian intertidal fauna. Marine and Freshwater Research 61: 963-970 |
| Benthic molluscs        | Temperate | Tasman Sea | 1000 | 1955 | 54 | 23.1 | Yes | No |  | Pitt N, Poloczanska E.S. and Hobday A.J. 2010 Climate-driven range changes in Tasmanian intertidal fauna. Marine and Freshwater Research 61: 963-970 |

|                         |           |            |         |      |    |      |     |     |                                                                                                                                                               |
|-------------------------|-----------|------------|---------|------|----|------|-----|-----|---------------------------------------------------------------------------------------------------------------------------------------------------------------|
|                         |           |            |         |      |    |      |     |     | intertidal fauna. Marine and Freshwater Research 61: 963-970                                                                                                  |
| Benthic molluscs        | Temperate | Tasman Sea | 1000    | 1955 | 54 | 3.7  | Yes | No  | Pitt N, Poloczanska E.S. and Hobday A.J. 2010 Climate-driven range changes in Tasmanian intertidal fauna. Marine and Freshwater Research 61: 963-970          |
| Benthic molluscs        | Temperate | Tasman Sea | 1000    | 1955 | 54 | 22.2 | Yes | No  | Pitt N, Poloczanska E.S. and Hobday A.J. 2010 Climate-driven range changes in Tasmanian intertidal fauna. Marine and Freshwater Research 61: 963-970          |
| Benthic molluscs        | Temperate | Tasman Sea | 1000    | 1955 | 54 | 43.5 | Yes | No  | Pitt N, Poloczanska E.S. and Hobday A.J. 2010 Climate-driven range changes in Tasmanian intertidal fauna. Marine and Freshwater Research 61: 963-970          |
| Benthic invert. (other) | Temperate | Tasman Sea | 1000    | 1955 | 54 | 43.5 | Yes | No  | Pitt N, Poloczanska E.S. and Hobday A.J. 2010 Climate-driven range changes in Tasmanian intertidal fauna. Marine and Freshwater Research 61: 963-970          |
| Benthic invert. (other) | Temperate | Tasman Sea | 1000    | 1955 | 54 | 22.2 | Yes | No  | Pitt N, Poloczanska E.S. and Hobday A.J. 2010 Climate-driven range changes in Tasmanian intertidal fauna. Marine and Freshwater Research 61: 963-970          |
| Bony fish               | Temperate | North Sea  | 1000000 | 1923 | 85 | 10.3 | Yes | Yes | Engelhard, G.H. Pinnegar, J.K., Kell, L.T., Rijnsdorp, A.D. 2011. Nine decades of North Sea sole and plaice distribution. ICES J. Mar. Sci. 68(6): 1090-1104. |
| Bony fish               | Temperate | North Sea  | 1000000 | 1913 | 95 | 24.9 | No  | Yes | Engelhard, G.H. Pinnegar, J.K., Kell, L.T., Rijnsdorp, A.D. 2011. Nine decades of North Sea sole and plaice distribution. ICES J. Mar. Sci. 68(6): 1090-1104. |
| TRAILING EDGE           |           |            |         |      |    |      |     |     |                                                                                                                                                               |

|                   |             |                     |       |      |    |       |     |     |                                                                                                                                                                                                                          |
|-------------------|-------------|---------------------|-------|------|----|-------|-----|-----|--------------------------------------------------------------------------------------------------------------------------------------------------------------------------------------------------------------------------|
| Benthic crustacea | Temperate   | North-east Atlantic | 10000 | 1972 | 35 | -10.0 | Yes | Yes | Wetthey, D. S. and S. A. Woodin. 2008. Ecological hindcasting of biogeographic responses to climate change in the European intertidal zone. <i>Hydrobiologia</i> 606:139-151.                                            |
| Benthic crustacea | Temperate   | North-east Atlantic | 10000 | 1972 | 35 | -50.0 | Yes | Yes | Wetthey, D. S. and S. A. Woodin. 2008. Ecological hindcasting of biogeographic responses to climate change in the European intertidal zone. <i>Hydrobiologia</i> 606:139-151.                                            |
| Benthic algae     | Subtropical | North-east Atlantic | 10000 | 1960 | 47 | -38.3 | Yes | No  | Lima, F. P., P. A. Ribeiro, N. Queiroz, S. J. Hawkins, and A. M. Santos. 2007. Do distributional shifts of northern and southern species of algae match the warming pattern? <i>Global Change Biology</i> 13: 2592-2605. |
| Benthic algae     | Subtropical | North-east Atlantic | 10000 | 1960 | 47 | -14.9 | Yes | No  | Lima, F. P., P. A. Ribeiro, N. Queiroz, S. J. Hawkins, and A. M. Santos. 2007. Do distributional shifts of northern and southern species of algae match the warming pattern? <i>Global Change Biology</i> 13: 2592-2605. |
| Benthic algae     | Temperate   | North-east Atlantic | 10000 | 1960 | 47 | -13.2 | Yes | No  | Lima, F. P., P. A. Ribeiro, N. Queiroz, S. J. Hawkins, and A. M. Santos. 2007. Do distributional shifts of northern and southern species of algae match the warming pattern? <i>Global Change Biology</i> 13: 2592-2605. |
| Benthic algae     | Subtropical | North-east Atlantic | 10000 | 1960 | 47 | -46.6 | Yes | No  | Lima, F. P., P. A. Ribeiro, N. Queiroz, S. J. Hawkins, and A. M. Santos. 2007. Do distributional shifts of northern and southern species of algae match the warming pattern? <i>Global Change Biology</i> 13: 2592-2605. |
| Benthic algae     | Subtropical | North-east Atlantic | 10000 | 1960 | 47 | -76.2 | Yes | No  | Lima, F. P., P. A. Ribeiro, N. Queiroz, S. J. Hawkins, and A. M. Santos. 2007. Do distributional shifts of northern and southern species of algae match the warming pattern? <i>Global Change Biology</i> 13: 2592-2605. |

|               |             |                     |       |      |    |       |     |    |                                                                                                                                                                                                                          |
|---------------|-------------|---------------------|-------|------|----|-------|-----|----|--------------------------------------------------------------------------------------------------------------------------------------------------------------------------------------------------------------------------|
| Benthic algae | Subtropical | North-east Atlantic | 10000 | 1960 | 47 | -52.1 | Yes | No | Lima, F. P., P. A. Ribeiro, N. Queiroz, S. J. Hawkins, and A. M. Santos. 2007. Do distributional shifts of northern and southern species of algae match the warming pattern? <i>Global Change Biology</i> 13: 2592-2605. |
| Benthic algae | Subtropical | North-east Atlantic | 10000 | 1960 | 47 | 0     | Yes | No | Lima, F. P., P. A. Ribeiro, N. Queiroz, S. J. Hawkins, and A. M. Santos. 2007. Do distributional shifts of northern and southern species of algae match the warming pattern? <i>Global Change Biology</i> 13: 2592-2605. |
| Benthic algae | Subtropical | North-east Atlantic | 10000 | 1960 | 47 | 0     | Yes | No | Lima, F. P., P. A. Ribeiro, N. Queiroz, S. J. Hawkins, and A. M. Santos. 2007. Do distributional shifts of northern and southern species of algae match the warming pattern? <i>Global Change Biology</i> 13: 2592-2605. |
| Benthic algae | Subtropical | North-east Atlantic | 10000 | 1960 | 47 | 0     | Yes | No | Lima, F. P., P. A. Ribeiro, N. Queiroz, S. J. Hawkins, and A. M. Santos. 2007. Do distributional shifts of northern and southern species of algae match the warming pattern? <i>Global Change Biology</i> 13: 2592-2605. |
| Benthic algae | Subtropical | North-east Atlantic | 10000 | 1960 | 47 | 0     | Yes | No | Lima, F. P., P. A. Ribeiro, N. Queiroz, S. J. Hawkins, and A. M. Santos. 2007. Do distributional shifts of northern and southern species of algae match the warming pattern? <i>Global Change Biology</i> 13: 2592-2605. |
| Benthic algae | Subtropical | North-east Atlantic | 10000 | 1960 | 47 | 0     | Yes | No | Lima, F. P., P. A. Ribeiro, N. Queiroz, S. J. Hawkins, and A. M. Santos. 2007. Do distributional shifts of northern and southern species of algae match the warming pattern? <i>Global Change Biology</i> 13: 2592-2605. |
| Benthic algae | Subtropical | North-east Atlantic | 10000 | 1960 | 47 | 0     | Yes | No | Lima, F. P., P. A. Ribeiro, N. Queiroz, S. J. Hawkins, and A. M. Santos. 2007. Do distributional shifts of northern and southern species of algae match the warming pattern? <i>Global Change Biology</i> 13: 2592-2605. |



|               |             |                     |       |      |    |      |     |    |                                                                                                                                                                                                                      |
|---------------|-------------|---------------------|-------|------|----|------|-----|----|----------------------------------------------------------------------------------------------------------------------------------------------------------------------------------------------------------------------|
|               |             |                     |       |      |    |      |     |    | species of algae match the warming pattern?<br>Global Change Biology 13: 2592-2605.                                                                                                                                  |
| Benthic algae | Subtropical | North-east Atlantic | 10000 | 1960 | 47 | 0    | Yes | No | Lima, F. P., P. A. Ribeiro, N. Queiroz, S. J. Hawkins, and A. M. Santos. 2007. Do distributional shifts of northern and southern species of algae match the warming pattern?<br>Global Change Biology 13: 2592-2605. |
| Benthic algae | Subtropical | North-east Atlantic | 10000 | 1960 | 47 | 70.2 | Yes | No | Lima, F. P., P. A. Ribeiro, N. Queiroz, S. J. Hawkins, and A. M. Santos. 2007. Do distributional shifts of northern and southern species of algae match the warming pattern?<br>Global Change Biology 13: 2592-2605. |
| Benthic algae | Subtropical | North-east Atlantic | 10000 | 1960 | 47 | 54.7 | Yes | No | Lima, F. P., P. A. Ribeiro, N. Queiroz, S. J. Hawkins, and A. M. Santos. 2007. Do distributional shifts of northern and southern species of algae match the warming pattern?<br>Global Change Biology 13: 2592-2605. |
| Benthic algae | Subtropical | North-east Atlantic | 10000 | 1960 | 47 | 48.3 | Yes | No | Lima, F. P., P. A. Ribeiro, N. Queiroz, S. J. Hawkins, and A. M. Santos. 2007. Do distributional shifts of northern and southern species of algae match the warming pattern?<br>Global Change Biology 13: 2592-2605. |
| Benthic algae | Subtropical | North-east Atlantic | 10000 | 1960 | 47 | 33.4 | Yes | No | Lima, F. P., P. A. Ribeiro, N. Queiroz, S. J. Hawkins, and A. M. Santos. 2007. Do distributional shifts of northern and southern species of algae match the warming pattern?<br>Global Change Biology 13: 2592-2605. |
| Benthic algae | Temperate   | North-east Atlantic | 10000 | 1960 | 47 | 19.2 | Yes | No | Lima, F. P., P. A. Ribeiro, N. Queiroz, S. J. Hawkins, and A. M. Santos. 2007. Do distributional shifts of northern and southern species of algae match the warming pattern?<br>Global Change Biology 13: 2592-2605. |
| Benthic algae | Subtropical | North-east          | 10000 | 1960 | 47 | 25.7 | Yes | No | Lima, F. P., P. A. Ribeiro, N. Queiroz, S. J.                                                                                                                                                                        |

|               |             |                     |         |      |    |      |     |    |  |                                                                                                                                                                                                                          |
|---------------|-------------|---------------------|---------|------|----|------|-----|----|--|--------------------------------------------------------------------------------------------------------------------------------------------------------------------------------------------------------------------------|
|               |             | Atlantic            |         |      |    |      |     |    |  | Hawkins, and A. M. Santos. 2007. Do distributional shifts of northern and southern species of algae match the warming pattern? <i>Global Change Biology</i> 13: 2592-2605.                                               |
| Benthic algae | Subtropical | North-east Atlantic | 10000   | 1960 | 47 | -1.9 | Yes | No |  | Lima, F. P., P. A. Ribeiro, N. Queiroz, S. J. Hawkins, and A. M. Santos. 2007. Do distributional shifts of northern and southern species of algae match the warming pattern? <i>Global Change Biology</i> 13: 2592-2605. |
| Benthic algae | Subtropical | North-east Atlantic | 10000   | 1960 | 47 | 1.9  | Yes | No |  | Lima, F. P., P. A. Ribeiro, N. Queiroz, S. J. Hawkins, and A. M. Santos. 2007. Do distributional shifts of northern and southern species of algae match the warming pattern? <i>Global Change Biology</i> 13: 2592-2605. |
| Benthic algae | Subtropical | North-east Atlantic | 10000   | 1960 | 47 | 5.9  | Yes | No |  | Lima, F. P., P. A. Ribeiro, N. Queiroz, S. J. Hawkins, and A. M. Santos. 2007. Do distributional shifts of northern and southern species of algae match the warming pattern? <i>Global Change Biology</i> 13: 2592-2605. |
| Benthic algae | Temperate   | North-east Atlantic | 10000   | 1960 | 47 | 1.9  | Yes | No |  | Lima, F. P., P. A. Ribeiro, N. Queiroz, S. J. Hawkins, and A. M. Santos. 2007. Do distributional shifts of northern and southern species of algae match the warming pattern? <i>Global Change Biology</i> 13: 2592-2605. |
| Benthic algae | Temperate   | North-east Atlantic | 10000   | 1960 | 47 | 3.8  | Yes | No |  | Lima, F. P., P. A. Ribeiro, N. Queiroz, S. J. Hawkins, and A. M. Santos. 2007. Do distributional shifts of northern and southern species of algae match the warming pattern? <i>Global Change Biology</i> 13: 2592-2605. |
| Non-bony fish | Temperate   | North-west Atlantic | 1000000 | 1968 | 40 | 0    | Yes | No |  | Nye, J.A., J.S. Link, J.A. Hare and W.J. Overholtz. 2009. Changing spatial distribution of fish stocks in relation to climate and population size on the Northeast United                                                |

|                   |           |                     |         |      |    |        |     |     |                                                                                                                                                                                                                                                          |
|-------------------|-----------|---------------------|---------|------|----|--------|-----|-----|----------------------------------------------------------------------------------------------------------------------------------------------------------------------------------------------------------------------------------------------------------|
|                   |           |                     |         |      |    |        |     |     | States continental shelf. Marine Ecology Progress Series. 393: 111-129                                                                                                                                                                                   |
| Benthic molluscs  | Temperate | North-east Atlantic | 1000    | 1960 | 48 | -60.2  | No  | No  | Beukema, J.J., Dekker, R., Jansen, J.M. 2009. Some like it cold: populations of the tellinid bivalve <i>Macoma balthica</i> (L.) suffer in various ways from a warming climate. Marine Ecology Progress Series 384: 135_145                              |
| Mammals           | Polar     | Beaufort Sea        | 100000  | 1985 | 20 | -857.0 | Yes | No  | Fischbach, A.S., S.C. Amstrup and D.C. Douglas. 2007. Landward and eastward shift of Alaskan polar bear denning associated with recent sea ice changes. Polar Biology 30:1395-1405                                                                       |
| Non-bony fish     | Temperate | North Sea           | 1000000 | 1977 | 25 | 0      | Yes | Yes | Perry, A. L., P. J. Low, J. R. Ellis and J. D. Reynolds. 2005. Climate change and distribution shifts in marine fishes. Science. 308: 1912:1915                                                                                                          |
| Benthic crustacea | Temperate | Bering Sea          | 100000  | 1975 | 27 | -155.4 | Yes | No  | Orensanz J., B. Ernst, D.A. Armstrong, P. Stabeno and P. Livingston 2004. Contraction of the geographic range of distribution of snow crab ( <i>Chionoecetes opilio</i> ) in the eastern Bering Sea: An environmental ratchet? CalCOFI Report 45: 65-79. |
| Zooplankton       | Temperate | North-east Atlantic | 1E+08   | 1958 | 48 | -161.9 | No  | No  | Beaugrand, G., C. Luczak and M. Edwards. 2009. Rapid biogeographical plankton shifts in the North Atlantic Ocean. Global Change Biology 15: 1790-1803                                                                                                    |
| Zooplankton       | Temperate | North-east Atlantic | 1E+08   | 1958 | 48 | -92.6  | No  | No  | Beaugrand, G., C. Luczak and M. Edwards. 2009. Rapid biogeographical plankton shifts in the North Atlantic Ocean. Global Change Biology 15: 1790-1803                                                                                                    |
| Zooplankton       | Temperate | North-east Atlantic | 1E+08   | 1958 | 48 | -46.3  | No  | No  | Beaugrand, G., C. Luczak and M. Edwards. 2009. Rapid biogeographical plankton shifts in the North Atlantic Ocean. Global Change                                                                                                                          |

|                         |             |                     |         |      |    |       |     |     |                                                                                                                                                                                                                                   |
|-------------------------|-------------|---------------------|---------|------|----|-------|-----|-----|-----------------------------------------------------------------------------------------------------------------------------------------------------------------------------------------------------------------------------------|
|                         |             |                     |         |      |    |       |     |     | Biology 15: 1790-1803                                                                                                                                                                                                             |
| Zooplankton             | Temperate   | North-east Atlantic | 1E+08   | 1958 | 48 | -57.8 | No  | No  | Beaugrand, G., C. Luczak and M. Edwards. 2009. Rapid biogeographical plankton shifts in the North Atlantic Ocean. Global Change Biology 15: 1790-1803                                                                             |
| Benthic crustacea       | Temperate   | Bering Sea          | 1000000 | 1982 | 25 | 35.6  | Yes | Yes | Mueter, F.J. and M.A. Litzow. 2008. Sea ice retreat alters the biogeography of the bering sea continental shelf. Ecological Applications 18: 309-302                                                                              |
| Benthic cnidarians      | Subtropical | South-west Pacific  | 1000    | 1955 | 54 | 0     | Yes | No  | Poloczanska, E.S., et al. 2011. Little change in the distribution of rocky shore faunal communities on the East Australian coast after 50 years of rapid warming. Journal of Experimental Marine Biology and Ecology 400: 145-154 |
| Benthic cnidarians      | Subtropical | South-west Pacific  | 1000    | 1955 | 54 | -31.5 | Yes | No  | Poloczanska, E.S., et al. 2011. Little change in the distribution of rocky shore faunal communities on the East Australian coast after 50 years of rapid warming. Journal of Experimental Marine Biology and Ecology 400: 145-154 |
| Benthic invert. (other) | Subtropical | South-west Pacific  | 1000    | 1955 | 54 | 8.4   | Yes | No  | Poloczanska, E.S., et al. 2011. Little change in the distribution of rocky shore faunal communities on the East Australian coast after 50 years of rapid warming. Journal of Experimental Marine Biology and Ecology 400: 145-154 |
| Benthic molluscs        | Subtropical | South-west Pacific  | 1000    | 1955 | 54 | -62.2 | Yes | No  | Poloczanska, E.S., et al. 2011. Little change in the distribution of rocky shore faunal communities on the East Australian coast after 50 years of rapid warming. Journal of Experimental Marine Biology and Ecology 400: 145-154 |

|                  |             |                    |      |      |    |       |     |    |                                                                                                                                                                                                                                   |
|------------------|-------------|--------------------|------|------|----|-------|-----|----|-----------------------------------------------------------------------------------------------------------------------------------------------------------------------------------------------------------------------------------|
| Benthic molluscs | Subtropical | South-west Pacific | 1000 | 1955 | 54 | 0     | Yes | No | Poloczanska, E.S., et al. 2011. Little change in the distribution of rocky shore faunal communities on the East Australian coast after 50 years of rapid warming. Journal of Experimental Marine Biology and Ecology 400: 145-154 |
| Benthic molluscs | Subtropical | South-west Pacific | 1000 | 1955 | 54 | -41.7 | Yes | No | Poloczanska, E.S., et al. 2011. Little change in the distribution of rocky shore faunal communities on the East Australian coast after 50 years of rapid warming. Journal of Experimental Marine Biology and Ecology 400: 145-154 |
| Benthic molluscs | Subtropical | South-west Pacific | 1000 | 1955 | 54 | 72.4  | Yes | No | Poloczanska, E.S., et al. 2011. Little change in the distribution of rocky shore faunal communities on the East Australian coast after 50 years of rapid warming. Journal of Experimental Marine Biology and Ecology 400: 145-154 |
| Benthic molluscs | Subtropical | South-west Pacific | 1000 | 1955 | 54 | 41.7  | Yes | No | Poloczanska, E.S., et al. 2011. Little change in the distribution of rocky shore faunal communities on the East Australian coast after 50 years of rapid warming. Journal of Experimental Marine Biology and Ecology 400: 145-154 |
| Benthic molluscs | Subtropical | South-west Pacific | 1000 | 1955 | 54 | 0     | Yes | No | Poloczanska, E.S., et al. 2011. Little change in the distribution of rocky shore faunal communities on the East Australian coast after 50 years of rapid warming. Journal of Experimental Marine Biology and Ecology 400: 145-154 |
| Benthic molluscs | Subtropical | South-west Pacific | 1000 | 1955 | 54 | 0     | Yes | No | Poloczanska, E.S., et al. 2011. Little change in the distribution of rocky shore faunal communities on the East Australian coast                                                                                                  |

|                   |             |                    |      |      |    |        |     |    |  |                                                                                                                                                                                                                                   |
|-------------------|-------------|--------------------|------|------|----|--------|-----|----|--|-----------------------------------------------------------------------------------------------------------------------------------------------------------------------------------------------------------------------------------|
|                   |             |                    |      |      |    |        |     |    |  | after 50 years of rapid warming. Journal of Experimental Marine Biology and Ecology 400: 145-154                                                                                                                                  |
| Benthic molluscs  | Subtropical | South-west Pacific | 1000 | 1955 | 54 | 8.9    | Yes | No |  | Poloczanska, E.S., et al. 2011. Little change in the distribution of rocky shore faunal communities on the East Australian coast after 50 years of rapid warming. Journal of Experimental Marine Biology and Ecology 400: 145-154 |
| Benthic crustacea | Subtropical | South-west Pacific | 1000 | 1955 | 54 | -26.8  | Yes | No |  | Poloczanska, E.S., et al. 2011. Little change in the distribution of rocky shore faunal communities on the East Australian coast after 50 years of rapid warming. Journal of Experimental Marine Biology and Ecology 400: 145-154 |
| Benthic crustacea | Subtropical | South-west Pacific | 1000 | 1955 | 54 | -117.4 | Yes | No |  | Poloczanska, E.S., et al. 2011. Little change in the distribution of rocky shore faunal communities on the East Australian coast after 50 years of rapid warming. Journal of Experimental Marine Biology and Ecology 400: 145-154 |
| Benthic crustacea | Subtropical | South-west Pacific | 1000 | 1955 | 54 | 0      | Yes | No |  | Poloczanska, E.S., et al. 2011. Little change in the distribution of rocky shore faunal communities on the East Australian coast after 50 years of rapid warming. Journal of Experimental Marine Biology and Ecology 400: 145-154 |
| Benthic crustacea | Subtropical | South-west Pacific | 1000 | 1955 | 54 | -9.6   | Yes | No |  | Poloczanska, E.S., et al. 2011. Little change in the distribution of rocky shore faunal communities on the East Australian coast after 50 years of rapid warming. Journal of Experimental Marine Biology and Ecology 400: 145-154 |

|                         |             |                    |      |      |    |       |     |    |                                                                                                                                                                                                                                   |
|-------------------------|-------------|--------------------|------|------|----|-------|-----|----|-----------------------------------------------------------------------------------------------------------------------------------------------------------------------------------------------------------------------------------|
| Benthic crustacea       | Tropical    | South-west Pacific | 1000 | 1955 | 54 | -27.7 | Yes | No | Poloczanska, E.S., et al. 2011. Little change in the distribution of rocky shore faunal communities on the East Australian coast after 50 years of rapid warming. Journal of Experimental Marine Biology and Ecology 400: 145-154 |
| Benthic invert. (other) | Subtropical | South-west Pacific | 1000 | 1955 | 54 | -15.6 | Yes | No | Poloczanska, E.S., et al. 2011. Little change in the distribution of rocky shore faunal communities on the East Australian coast after 50 years of rapid warming. Journal of Experimental Marine Biology and Ecology 400: 145-154 |
| Benthic invert. (other) | Subtropical | South-west Pacific | 1000 | 1955 | 54 | 0     | Yes | No | Poloczanska, E.S., et al. 2011. Little change in the distribution of rocky shore faunal communities on the East Australian coast after 50 years of rapid warming. Journal of Experimental Marine Biology and Ecology 400: 145-154 |
| Benthic algae           | Subtropical | Indian Ocean       | 1000 | 1951 | 50 | -1.3  | No  | No | Wernberg T., et al. 2011 Seaweed communities in retreat from global warming. Current Biology 21: 1828-1832                                                                                                                        |
| Benthic algae           | Subtropical | Indian Ocean       | 1000 | 1951 | 50 | -1.2  | No  | No | Wernberg T., et al. 2011 Seaweed communities in retreat from global warming. Current Biology 21: 1828-1832                                                                                                                        |
| Benthic algae           | Subtropical | Indian Ocean       | 1000 | 1951 | 50 | -1.0  | No  | No | Wernberg T., et al. 2011 Seaweed communities in retreat from global warming. Current Biology 21: 1828-1832                                                                                                                        |
| Benthic algae           | Subtropical | Indian Ocean       | 1000 | 1951 | 50 | -0.9  | No  | No | Wernberg T., et al. 2011 Seaweed communities in retreat from global warming. Current Biology 21: 1828-1832                                                                                                                        |
| Benthic algae           | Subtropical | Indian Ocean       | 1000 | 1951 | 50 | -0.8  | No  | No | Wernberg T., et al. 2011 Seaweed communities in retreat from global warming.                                                                                                                                                      |

|               |             |              |      |      |    |      |    |    |                                                                                                            |
|---------------|-------------|--------------|------|------|----|------|----|----|------------------------------------------------------------------------------------------------------------|
|               |             |              |      |      |    |      |    |    | Current Biology 21: 1828-1832                                                                              |
| Benthic algae | Subtropical | Indian Ocean | 1000 | 1951 | 50 | -0.7 | No | No | Wernberg T., et al. 2011 Seaweed communities in retreat from global warming. Current Biology 21: 1828-1832 |
| Benthic algae | Subtropical | Indian Ocean | 1000 | 1951 | 50 | -0.5 | No | No | Wernberg T., et al. 2011 Seaweed communities in retreat from global warming. Current Biology 21: 1828-1832 |
| Benthic algae | Subtropical | Indian Ocean | 1000 | 1951 | 50 | -0.5 | No | No | Wernberg T., et al. 2011 Seaweed communities in retreat from global warming. Current Biology 21: 1828-1832 |
| Benthic algae | Subtropical | Indian Ocean | 1000 | 1951 | 50 | 0.1  | No | No | Wernberg T., et al. 2011 Seaweed communities in retreat from global warming. Current Biology 21: 1828-1832 |
| Benthic algae | Subtropical | Indian Ocean | 1000 | 1951 | 50 | 0.1  | No | No | Wernberg T., et al. 2011 Seaweed communities in retreat from global warming. Current Biology 21: 1828-1832 |
| Benthic algae | Subtropical | Indian Ocean | 1000 | 1951 | 50 | 0.3  | No | No | Wernberg T., et al. 2011 Seaweed communities in retreat from global warming. Current Biology 21: 1828-1832 |
| Benthic algae | Subtropical | Indian Ocean | 1000 | 1951 | 50 | 0.4  | No | No | Wernberg T., et al. 2011 Seaweed communities in retreat from global warming. Current Biology 21: 1828-1832 |
| Benthic algae | Subtropical | Indian Ocean | 1000 | 1951 | 50 | 0.4  | No | No | Wernberg T., et al. 2011 Seaweed communities in retreat from global warming. Current Biology 21: 1828-1832 |
| Benthic algae | Subtropical | Indian Ocean | 1000 | 1951 | 50 | 0.7  | No | No | Wernberg T., et al. 2011 Seaweed communities in retreat from global warming. Current Biology 21: 1828-1832 |
| Benthic algae | Subtropical | Indian Ocean | 1000 | 1951 | 50 | 1.6  | No | No | Wernberg T., et al. 2011 Seaweed communities in retreat from global warming. Current Biology 21: 1828-1832 |
| Benthic algae | Subtropical | Indian       | 1000 | 1951 | 50 | -4.8 | No | No | Wernberg T., et al. 2011 Seaweed                                                                           |



|               |             |              |      |      |    |      |    |    |                                                                                                            |
|---------------|-------------|--------------|------|------|----|------|----|----|------------------------------------------------------------------------------------------------------------|
|               |             | Ocean        |      |      |    |      |    |    | communities in retreat from global warming. Current Biology 21: 1828-1832                                  |
| Benthic algae | Subtropical | Indian Ocean | 1000 | 1951 | 50 | -3.2 | No | No | Wernberg T., et al. 2011 Seaweed communities in retreat from global warming. Current Biology 21: 1828-1832 |
| Benthic algae | Subtropical | Indian Ocean | 1000 | 1951 | 50 | -3.1 | No | No | Wernberg T., et al. 2011 Seaweed communities in retreat from global warming. Current Biology 21: 1828-1832 |
| Benthic algae | Subtropical | Indian Ocean | 1000 | 1951 | 50 | -2.8 | No | No | Wernberg T., et al. 2011 Seaweed communities in retreat from global warming. Current Biology 21: 1828-1832 |
| Benthic algae | Subtropical | Indian Ocean | 1000 | 1951 | 50 | -2.5 | No | No | Wernberg T., et al. 2011 Seaweed communities in retreat from global warming. Current Biology 21: 1828-1832 |
| Benthic algae | Subtropical | Indian Ocean | 1000 | 1951 | 50 | -1.8 | No | No | Wernberg T., et al. 2011 Seaweed communities in retreat from global warming. Current Biology 21: 1828-1832 |
| Benthic algae | Subtropical | Indian Ocean | 1000 | 1951 | 50 | -1.6 | No | No | Wernberg T., et al. 2011 Seaweed communities in retreat from global warming. Current Biology 21: 1828-1832 |
| Benthic algae | Subtropical | Indian Ocean | 1000 | 1951 | 50 | -1.6 | No | No | Wernberg T., et al. 2011 Seaweed communities in retreat from global warming. Current Biology 21: 1828-1832 |
| Benthic algae | Subtropical | Indian Ocean | 1000 | 1951 | 50 | -1.4 | No | No | Wernberg T., et al. 2011 Seaweed communities in retreat from global warming. Current Biology 21: 1828-1832 |
| Benthic algae | Subtropical | Indian Ocean | 1000 | 1951 | 50 | -1.0 | No | No | Wernberg T., et al. 2011 Seaweed communities in retreat from global warming. Current Biology 21: 1828-1832 |
| Benthic algae | Subtropical | Indian Ocean | 1000 | 1951 | 50 | -0.7 | No | No | Wernberg T., et al. 2011 Seaweed communities in retreat from global warming. Current Biology 21: 1828-1832 |

|               |             |              |      |      |    |      |    |    |                                                                                                            |
|---------------|-------------|--------------|------|------|----|------|----|----|------------------------------------------------------------------------------------------------------------|
| Benthic algae | Subtropical | Indian Ocean | 1000 | 1951 | 50 | -0.7 | No | No | Wernberg T., et al. 2011 Seaweed communities in retreat from global warming. Current Biology 21: 1828-1832 |
| Benthic algae | Subtropical | Indian Ocean | 1000 | 1951 | 50 | -0.6 | No | No | Wernberg T., et al. 2011 Seaweed communities in retreat from global warming. Current Biology 21: 1828-1832 |
| Benthic algae | Subtropical | Indian Ocean | 1000 | 1951 | 50 | -0.5 | No | No | Wernberg T., et al. 2011 Seaweed communities in retreat from global warming. Current Biology 21: 1828-1832 |
| Benthic algae | Subtropical | Indian Ocean | 1000 | 1951 | 50 | -0.5 | No | No | Wernberg T., et al. 2011 Seaweed communities in retreat from global warming. Current Biology 21: 1828-1832 |
| Benthic algae | Subtropical | Indian Ocean | 1000 | 1951 | 50 | -0.1 | No | No | Wernberg T., et al. 2011 Seaweed communities in retreat from global warming. Current Biology 21: 1828-1832 |
| Benthic algae | Subtropical | Indian Ocean | 1000 | 1951 | 50 | -0.1 | No | No | Wernberg T., et al. 2011 Seaweed communities in retreat from global warming. Current Biology 21: 1828-1832 |
| Benthic algae | Subtropical | Indian Ocean | 1000 | 1951 | 50 | 0    | No | No | Wernberg T., et al. 2011 Seaweed communities in retreat from global warming. Current Biology 21: 1828-1832 |
| Benthic algae | Subtropical | Indian Ocean | 1000 | 1951 | 50 | 0.1  | No | No | Wernberg T., et al. 2011 Seaweed communities in retreat from global warming. Current Biology 21: 1828-1832 |
| Benthic algae | Subtropical | Indian Ocean | 1000 | 1951 | 50 | 0.1  | No | No | Wernberg T., et al. 2011 Seaweed communities in retreat from global warming. Current Biology 21: 1828-1832 |
| Benthic algae | Subtropical | Indian Ocean | 1000 | 1951 | 50 | 0.1  | No | No | Wernberg T., et al. 2011 Seaweed communities in retreat from global warming. Current Biology 21: 1828-1832 |
| Benthic algae | Subtropical | Indian Ocean | 1000 | 1951 | 50 | 0.3  | No | No | Wernberg T., et al. 2011 Seaweed communities in retreat from global warming.                               |

|               |             |                    |      |      |    |      |    |    |                                                                                                            |
|---------------|-------------|--------------------|------|------|----|------|----|----|------------------------------------------------------------------------------------------------------------|
|               |             |                    |      |      |    |      |    |    | Current Biology 21: 1828-1832                                                                              |
| Benthic algae | Subtropical | Indian Ocean       | 1000 | 1951 | 50 | 0.3  | No | No | Wernberg T., et al. 2011 Seaweed communities in retreat from global warming. Current Biology 21: 1828-1832 |
| Benthic algae | Subtropical | Indian Ocean       | 1000 | 1951 | 50 | 0.4  | No | No | Wernberg T., et al. 2011 Seaweed communities in retreat from global warming. Current Biology 21: 1828-1832 |
| Benthic algae | Subtropical | Indian Ocean       | 1000 | 1951 | 50 | 0.4  | No | No | Wernberg T., et al. 2011 Seaweed communities in retreat from global warming. Current Biology 21: 1828-1832 |
| Benthic algae | Subtropical | Indian Ocean       | 1000 | 1951 | 50 | 0.4  | No | No | Wernberg T., et al. 2011 Seaweed communities in retreat from global warming. Current Biology 21: 1828-1832 |
| Benthic algae | Subtropical | Indian Ocean       | 1000 | 1951 | 50 | 0.4  | No | No | Wernberg T., et al. 2011 Seaweed communities in retreat from global warming. Current Biology 21: 1828-1832 |
| Benthic algae | Subtropical | Indian Ocean       | 1000 | 1951 | 50 | 0.4  | No | No | Wernberg T., et al. 2011 Seaweed communities in retreat from global warming. Current Biology 21: 1828-1832 |
| Benthic algae | Subtropical | Indian Ocean       | 1000 | 1951 | 50 | 0.9  | No | No | Wernberg T., et al. 2011 Seaweed communities in retreat from global warming. Current Biology 21: 1828-1832 |
| Benthic algae | Subtropical | Indian Ocean       | 1000 | 1951 | 50 | 0.9  | No | No | Wernberg T., et al. 2011 Seaweed communities in retreat from global warming. Current Biology 21: 1828-1832 |
| Benthic algae | Subtropical | South-west Pacific | 1000 | 1951 | 50 | -2.8 | No | No | Wernberg T., et al. 2011 Seaweed communities in retreat from global warming. Current Biology 21: 1828-1832 |
| Benthic algae | Subtropical | South-west Pacific | 1000 | 1951 | 50 | -1.9 | No | No | Wernberg T., et al. 2011 Seaweed communities in retreat from global warming. Current Biology 21: 1828-1832 |
| Benthic algae | Subtropical | South-west         | 1000 | 1951 | 50 | -1.9 | No | No | Wernberg T., et al. 2011 Seaweed                                                                           |

|               |             |                     |         |      |    |      |     |    |                                                                                                                                                                                                                                                  |
|---------------|-------------|---------------------|---------|------|----|------|-----|----|--------------------------------------------------------------------------------------------------------------------------------------------------------------------------------------------------------------------------------------------------|
|               |             | Pacific             |         |      |    |      |     |    | communities in retreat from global warming. Current Biology 21: 1828-1832                                                                                                                                                                        |
| Benthic algae | Subtropical | South-west Pacific  | 1000    | 1951 | 50 | 1.6  | No  | No | Wernberg T., et al. 2011 Seaweed communities in retreat from global warming. Current Biology 21: 1828-1832                                                                                                                                       |
| Benthic algae | Subtropical | South-west Pacific  | 1000    | 1951 | 50 | -1.9 | No  | No | Wernberg T., et al. 2011 Seaweed communities in retreat from global warming. Current Biology 21: 1828-1832                                                                                                                                       |
| Benthic algae | Subtropical | South-west Pacific  | 1000    | 1951 | 50 | -1.4 | No  | No | Wernberg T., et al. 2011 Seaweed communities in retreat from global warming. Current Biology 21: 1828-1832                                                                                                                                       |
| Benthic algae | Subtropical | South-west Pacific  | 1000    | 1951 | 50 | -1.4 | No  | No | Wernberg T., et al. 2011 Seaweed communities in retreat from global warming. Current Biology 21: 1828-1832                                                                                                                                       |
| CENTRE        |             |                     |         |      |    |      |     |    |                                                                                                                                                                                                                                                  |
| Bony fish     | Temperate   | North-west Atlantic | 1000000 | 1968 | 40 | 5.7  | Yes | No | Nye, J.A., J.S. Link, J.A. Hare and W.J. Overholtz. 2009. Changing spatial distribution of fish stocks in relation to climate and population size on the Northeast United States continental shelf. Marine Ecology Progress Series. 393: 111-129 |
| Bony fish     | Temperate   | North-west Atlantic | 1000000 | 1968 | 40 | 6.1  | Yes | No | Nye, J.A., J.S. Link, J.A. Hare and W.J. Overholtz. 2009. Changing spatial distribution of fish stocks in relation to climate and population size on the Northeast United States continental shelf. Marine Ecology Progress Series. 393: 111-129 |
| Bony fish     | Temperate   | North-west Atlantic | 1000000 | 1968 | 40 | 9.3  | Yes | No | Nye, J.A., J.S. Link, J.A. Hare and W.J. Overholtz. 2009. Changing spatial distribution of fish stocks in relation to climate and                                                                                                                |

|           |           |                     |         |      |    |      |     |    |                                                                                                                                                                                                                                                  |
|-----------|-----------|---------------------|---------|------|----|------|-----|----|--------------------------------------------------------------------------------------------------------------------------------------------------------------------------------------------------------------------------------------------------|
|           |           |                     |         |      |    |      |     |    | population size on the Northeast United States continental shelf. Marine Ecology Progress Series. 393: 111-129                                                                                                                                   |
| Bony fish | Temperate | North-west Atlantic | 1000000 | 1968 | 40 | 14.8 | Yes | No | Nye, J.A., J.S. Link, J.A. Hare and W.J. Overholtz. 2009. Changing spatial distribution of fish stocks in relation to climate and population size on the Northeast United States continental shelf. Marine Ecology Progress Series. 393: 111-129 |
| Bony fish | Temperate | North-west Atlantic | 1000000 | 1968 | 40 | 15.5 | Yes | No | Nye, J.A., J.S. Link, J.A. Hare and W.J. Overholtz. 2009. Changing spatial distribution of fish stocks in relation to climate and population size on the Northeast United States continental shelf. Marine Ecology Progress Series. 393: 111-129 |
| Bony fish | Temperate | North-west Atlantic | 1000000 | 1968 | 40 | 16.1 | Yes | No | Nye, J.A., J.S. Link, J.A. Hare and W.J. Overholtz. 2009. Changing spatial distribution of fish stocks in relation to climate and population size on the Northeast United States continental shelf. Marine Ecology Progress Series. 393: 111-129 |
| Bony fish | Temperate | North-west Atlantic | 1000000 | 1968 | 40 | 18.7 | Yes | No | Nye, J.A., J.S. Link, J.A. Hare and W.J. Overholtz. 2009. Changing spatial distribution of fish stocks in relation to climate and population size on the Northeast United States continental shelf. Marine Ecology Progress Series. 393: 111-129 |
| Bony fish | Temperate | North-west Atlantic | 1000000 | 1968 | 40 | 21.0 | Yes | No | Nye, J.A., J.S. Link, J.A. Hare and W.J. Overholtz. 2009. Changing spatial distribution of fish stocks in relation to climate and population size on the Northeast United States continental shelf. Marine Ecology Progress Series. 393: 111-129 |

|           |           |                     |         |      |    |      |     |    |                                                                                                                                                                                                                                                  |
|-----------|-----------|---------------------|---------|------|----|------|-----|----|--------------------------------------------------------------------------------------------------------------------------------------------------------------------------------------------------------------------------------------------------|
| Bony fish | Temperate | North-west Atlantic | 1000000 | 1968 | 40 | 25.7 | Yes | No | Nye, J.A., J.S. Link, J.A. Hare and W.J. Overholtz. 2009. Changing spatial distribution of fish stocks in relation to climate and population size on the Northeast United States continental shelf. Marine Ecology Progress Series. 393: 111-129 |
| Bony fish | Temperate | North-west Atlantic | 1000000 | 1968 | 40 | 34.4 | Yes | No | Nye, J.A., J.S. Link, J.A. Hare and W.J. Overholtz. 2009. Changing spatial distribution of fish stocks in relation to climate and population size on the Northeast United States continental shelf. Marine Ecology Progress Series. 393: 111-129 |
| Bony fish | Temperate | North-west Atlantic | 1000000 | 1968 | 40 | 35.8 | Yes | No | Nye, J.A., J.S. Link, J.A. Hare and W.J. Overholtz. 2009. Changing spatial distribution of fish stocks in relation to climate and population size on the Northeast United States continental shelf. Marine Ecology Progress Series. 393: 111-129 |
| Bony fish | Temperate | North-west Atlantic | 1000000 | 1968 | 40 | 38.1 | Yes | No | Nye, J.A., J.S. Link, J.A. Hare and W.J. Overholtz. 2009. Changing spatial distribution of fish stocks in relation to climate and population size on the Northeast United States continental shelf. Marine Ecology Progress Series. 393: 111-129 |
| Bony fish | Temperate | North-west Atlantic | 1000000 | 1968 | 40 | 43.2 | Yes | No | Nye, J.A., J.S. Link, J.A. Hare and W.J. Overholtz. 2009. Changing spatial distribution of fish stocks in relation to climate and population size on the Northeast United States continental shelf. Marine Ecology Progress Series. 393: 111-129 |
| Bony fish | Temperate | North-west Atlantic | 1000000 | 1968 | 40 | 54.7 | Yes | No | Nye, J.A., J.S. Link, J.A. Hare and W.J. Overholtz. 2009. Changing spatial distribution of fish stocks in relation to climate and                                                                                                                |

|           |           |                     |         |      |    |      |     |    |                                                                                                                                                                                                                                                  |
|-----------|-----------|---------------------|---------|------|----|------|-----|----|--------------------------------------------------------------------------------------------------------------------------------------------------------------------------------------------------------------------------------------------------|
|           |           |                     |         |      |    |      |     |    | population size on the Northeast United States continental shelf. Marine Ecology Progress Series. 393: 111-129                                                                                                                                   |
| Bony fish | Temperate | North-west Atlantic | 1000000 | 1968 | 40 | 55.2 | Yes | No | Nye, J.A., J.S. Link, J.A. Hare and W.J. Overholtz. 2009. Changing spatial distribution of fish stocks in relation to climate and population size on the Northeast United States continental shelf. Marine Ecology Progress Series. 393: 111-129 |
| Bony fish | Temperate | North-west Atlantic | 1000000 | 1968 | 40 | 68.6 | Yes | No | Nye, J.A., J.S. Link, J.A. Hare and W.J. Overholtz. 2009. Changing spatial distribution of fish stocks in relation to climate and population size on the Northeast United States continental shelf. Marine Ecology Progress Series. 393: 111-129 |
| Bony fish | Temperate | North-west Atlantic | 1000000 | 1968 | 40 | 85.3 | Yes | No | Nye, J.A., J.S. Link, J.A. Hare and W.J. Overholtz. 2009. Changing spatial distribution of fish stocks in relation to climate and population size on the Northeast United States continental shelf. Marine Ecology Progress Series. 393: 111-129 |
| Bony fish | Temperate | North-west Atlantic | 1000000 | 1968 | 40 | 0    | Yes | No | Nye, J.A., J.S. Link, J.A. Hare and W.J. Overholtz. 2009. Changing spatial distribution of fish stocks in relation to climate and population size on the Northeast United States continental shelf. Marine Ecology Progress Series. 393: 111-129 |
| Bony fish | Temperate | North-west Atlantic | 1000000 | 1968 | 40 | 0    | Yes | No | Nye, J.A., J.S. Link, J.A. Hare and W.J. Overholtz. 2009. Changing spatial distribution of fish stocks in relation to climate and population size on the Northeast United States continental shelf. Marine Ecology Progress Series. 393: 111-129 |

|           |           |                     |         |      |    |   |     |    |                                                                                                                                                                                                                                                  |
|-----------|-----------|---------------------|---------|------|----|---|-----|----|--------------------------------------------------------------------------------------------------------------------------------------------------------------------------------------------------------------------------------------------------|
| Bony fish | Temperate | North-west Atlantic | 1000000 | 1968 | 40 | 0 | Yes | No | Nye, J.A., J.S. Link, J.A. Hare and W.J. Overholtz. 2009. Changing spatial distribution of fish stocks in relation to climate and population size on the Northeast United States continental shelf. Marine Ecology Progress Series. 393: 111-129 |
| Bony fish | Temperate | North-west Atlantic | 1000000 | 1968 | 40 | 0 | Yes | No | Nye, J.A., J.S. Link, J.A. Hare and W.J. Overholtz. 2009. Changing spatial distribution of fish stocks in relation to climate and population size on the Northeast United States continental shelf. Marine Ecology Progress Series. 393: 111-129 |
| Bony fish | Temperate | North-west Atlantic | 1000000 | 1968 | 40 | 0 | Yes | No | Nye, J.A., J.S. Link, J.A. Hare and W.J. Overholtz. 2009. Changing spatial distribution of fish stocks in relation to climate and population size on the Northeast United States continental shelf. Marine Ecology Progress Series. 393: 111-129 |
| Bony fish | Temperate | North-west Atlantic | 1000000 | 1968 | 40 | 0 | Yes | No | Nye, J.A., J.S. Link, J.A. Hare and W.J. Overholtz. 2009. Changing spatial distribution of fish stocks in relation to climate and population size on the Northeast United States continental shelf. Marine Ecology Progress Series. 393: 111-129 |
| Bony fish | Temperate | North-west Atlantic | 1000000 | 1968 | 40 | 0 | Yes | No | Nye, J.A., J.S. Link, J.A. Hare and W.J. Overholtz. 2009. Changing spatial distribution of fish stocks in relation to climate and population size on the Northeast United States continental shelf. Marine Ecology Progress Series. 393: 111-129 |
| Bony fish | Temperate | North-west Atlantic | 1000000 | 1968 | 40 | 0 | Yes | No | Nye, J.A., J.S. Link, J.A. Hare and W.J. Overholtz. 2009. Changing spatial distribution of fish stocks in relation to climate and population size on the Northeast United States continental shelf. Marine Ecology Progress Series. 393: 111-129 |



|           |           |                     |         |      |    |   |     |    |                                                                                                                                                                                                                                                  |
|-----------|-----------|---------------------|---------|------|----|---|-----|----|--------------------------------------------------------------------------------------------------------------------------------------------------------------------------------------------------------------------------------------------------|
|           |           |                     |         |      |    |   |     |    | population size on the Northeast United States continental shelf. Marine Ecology Progress Series. 393: 111-129                                                                                                                                   |
| Bony fish | Temperate | North-west Atlantic | 1000000 | 1968 | 40 | 0 | Yes | No | Nye, J.A., J.S. Link, J.A. Hare and W.J. Overholtz. 2009. Changing spatial distribution of fish stocks in relation to climate and population size on the Northeast United States continental shelf. Marine Ecology Progress Series. 393: 111-129 |
| Bony fish | Temperate | North-west Atlantic | 1000000 | 1968 | 40 | 0 | Yes | No | Nye, J.A., J.S. Link, J.A. Hare and W.J. Overholtz. 2009. Changing spatial distribution of fish stocks in relation to climate and population size on the Northeast United States continental shelf. Marine Ecology Progress Series. 393: 111-129 |
| Bony fish | Temperate | North-west Atlantic | 1000000 | 1968 | 40 | 0 | Yes | No | Nye, J.A., J.S. Link, J.A. Hare and W.J. Overholtz. 2009. Changing spatial distribution of fish stocks in relation to climate and population size on the Northeast United States continental shelf. Marine Ecology Progress Series. 393: 111-129 |
| Bony fish | Temperate | North-west Atlantic | 1000000 | 1968 | 40 | 0 | Yes | No | Nye, J.A., J.S. Link, J.A. Hare and W.J. Overholtz. 2009. Changing spatial distribution of fish stocks in relation to climate and population size on the Northeast United States continental shelf. Marine Ecology Progress Series. 393: 111-129 |
| Bony fish | Temperate | North-west Atlantic | 1000000 | 1968 | 40 | 0 | Yes | No | Nye, J.A., J.S. Link, J.A. Hare and W.J. Overholtz. 2009. Changing spatial distribution of fish stocks in relation to climate and population size on the Northeast United States continental shelf. Marine Ecology Progress Series. 393: 111-129 |

|                  |           |                     |         |      |    |       |     |     |                                                                                                                                                                                                                                                  |
|------------------|-----------|---------------------|---------|------|----|-------|-----|-----|--------------------------------------------------------------------------------------------------------------------------------------------------------------------------------------------------------------------------------------------------|
| Non-bony fish    | Temperate | North-west Atlantic | 1000000 | 1968 | 40 | 0     | Yes | No  | Nye, J.A., J.S. Link, J.A. Hare and W.J. Overholtz. 2009. Changing spatial distribution of fish stocks in relation to climate and population size on the Northeast United States continental shelf. Marine Ecology Progress Series. 393: 111-129 |
| Bony fish        | Temperate | North-west Atlantic | 1000000 | 1968 | 40 | -38.2 | Yes | Yes | Nye, J.A., J.S. Link, J.A. Hare and W.J. Overholtz. 2009. Changing spatial distribution of fish stocks in relation to climate and population size on the Northeast United States continental shelf. Marine Ecology Progress Series. 393: 111-129 |
| Non-bony fish    | Temperate | North-west Atlantic | 1000000 | 1968 | 40 | -13.5 | Yes | No  | Nye, J.A., J.S. Link, J.A. Hare and W.J. Overholtz. 2009. Changing spatial distribution of fish stocks in relation to climate and population size on the Northeast United States continental shelf. Marine Ecology Progress Series. 393: 111-129 |
| Bony fish        | Temperate | North-west Atlantic | 1000000 | 1968 | 40 | -8.3  | Yes | No  | Nye, J.A., J.S. Link, J.A. Hare and W.J. Overholtz. 2009. Changing spatial distribution of fish stocks in relation to climate and population size on the Northeast United States continental shelf. Marine Ecology Progress Series. 393: 111-129 |
| Non-bony fish    | Temperate | North-west Atlantic | 1000000 | 1968 | 40 | -8.3  | Yes | No  | Nye, J.A., J.S. Link, J.A. Hare and W.J. Overholtz. 2009. Changing spatial distribution of fish stocks in relation to climate and population size on the Northeast United States continental shelf. Marine Ecology Progress Series. 393: 111-129 |
| Benthic molluscs | Temperate | North Sea           | 100     | 1973 | 30 | -0.9  | Yes | No  | Beukema, J.J. and R. Dekker. 2005. Decline of recruitment success in cockles and other bivalves in the Wadden Sea: possible role of                                                                                                              |

|                  |           |           |         |      |    |      |     |     |  |                                                                                                                                                                                                                                        |
|------------------|-----------|-----------|---------|------|----|------|-----|-----|--|----------------------------------------------------------------------------------------------------------------------------------------------------------------------------------------------------------------------------------------|
|                  |           |           |         |      |    |      |     |     |  | climate change, predation on postlarvae and fisheries. Marine Ecology Progress Series 287: 149-167                                                                                                                                     |
| Benthic molluscs | Temperate | North Sea | 100     | 1973 | 30 | -1   | Yes | No  |  | Beukema, J.J. and R. Dekker. 2005. Decline of recruitment success in cockles and other bivalves in the Wadden Sea: possible role of climate change, predation on postlarvae and fisheries. Marine Ecology Progress Series 287: 149-167 |
| Benthic molluscs | Temperate | North Sea | 100     | 1973 | 30 | -0.3 | Yes | No  |  | Beukema, J.J. and R. Dekker. 2005. Decline of recruitment success in cockles and other bivalves in the Wadden Sea: possible role of climate change, predation on postlarvae and fisheries. Marine Ecology Progress Series 287: 149-167 |
| Bony fish        | Temperate | North Sea | 1000000 | 1977 | 25 | 0    | Yes | Yes |  | Perry, A. L., P. J. Low, J. R. Ellis and J. D. Reynolds. 2005. Climate change and distribution shifts in marine fishes. Science. 308: 1912:1915                                                                                        |
| Bony fish        | Temperate | North Sea | 1000000 | 1977 | 25 | 69.9 | Yes | Yes |  | Perry, A. L., P. J. Low, J. R. Ellis and J. D. Reynolds. 2005. Climate change and distribution shifts in marine fishes. Science. 308: 1912:1915                                                                                        |
| Bony fish        | Temperate | North Sea | 1000000 | 1977 | 25 | 0    | Yes | Yes |  | Perry, A. L., P. J. Low, J. R. Ellis and J. D. Reynolds. 2005. Climate change and distribution shifts in marine fishes. Science. 308: 1912:1915                                                                                        |
| Bony fish        | Temperate | North Sea | 1000000 | 1977 | 25 | 39.9 | Yes | Yes |  | Perry, A. L., P. J. Low, J. R. Ellis and J. D. Reynolds. 2005. Climate change and distribution shifts in marine fishes. Science. 308: 1912:1915                                                                                        |
| Bony fish        | Temperate | North Sea | 1000000 | 1977 | 25 | 38.9 | Yes | Yes |  | Perry, A. L., P. J. Low, J. R. Ellis and J. D. Reynolds. 2005. Climate change and                                                                                                                                                      |

|           |           |           |         |      |    |       |     |     |  |                                                                                                                                                 |
|-----------|-----------|-----------|---------|------|----|-------|-----|-----|--|-------------------------------------------------------------------------------------------------------------------------------------------------|
|           |           |           |         |      |    |       |     |     |  | distribution shifts in marine fishes. Science. 308: 1912:1915                                                                                   |
| Bony fish | Temperate | North Sea | 1000000 | 1977 | 25 | 0     | Yes | Yes |  | Perry, A. L., P. J. Low, J. R. Ellis and J. D. Reynolds. 2005. Climate change and distribution shifts in marine fishes. Science. 308: 1912:1915 |
| Bony fish | Temperate | North Sea | 1000000 | 1977 | 25 | 23.3  | Yes | Yes |  | Perry, A. L., P. J. Low, J. R. Ellis and J. D. Reynolds. 2005. Climate change and distribution shifts in marine fishes. Science. 308: 1912:1915 |
| Bony fish | Temperate | North Sea | 1000000 | 1977 | 25 | 78    | Yes | Yes |  | Perry, A. L., P. J. Low, J. R. Ellis and J. D. Reynolds. 2005. Climate change and distribution shifts in marine fishes. Science. 308: 1912:1915 |
| Bony fish | Temperate | North Sea | 1000000 | 1977 | 25 | 118.8 | Yes | Yes |  | Perry, A. L., P. J. Low, J. R. Ellis and J. D. Reynolds. 2005. Climate change and distribution shifts in marine fishes. Science. 308: 1912:1915 |
| Bony fish | Temperate | North Sea | 1000000 | 1977 | 25 | 0     | Yes | Yes |  | Perry, A. L., P. J. Low, J. R. Ellis and J. D. Reynolds. 2005. Climate change and distribution shifts in marine fishes. Science. 308: 1912:1915 |
| Bony fish | Temperate | North Sea | 1000000 | 1977 | 25 | 0     | Yes | Yes |  | Perry, A. L., P. J. Low, J. R. Ellis and J. D. Reynolds. 2005. Climate change and distribution shifts in marine fishes. Science. 308: 1912:1915 |
| Bony fish | Temperate | North Sea | 1000000 | 1977 | 25 | 61.1  | Yes | Yes |  | Perry, A. L., P. J. Low, J. R. Ellis and J. D. Reynolds. 2005. Climate change and distribution shifts in marine fishes. Science. 308: 1912:1915 |
| Bony fish | Temperate | North Sea | 1000000 | 1977 | 25 | 0     | Yes | Yes |  | Perry, A. L., P. J. Low, J. R. Ellis and J. D. Reynolds. 2005. Climate change and distribution shifts in marine fishes. Science.                |

|           |           |           |         |      |    |   |     |     |                                                                                                                                                 |
|-----------|-----------|-----------|---------|------|----|---|-----|-----|-------------------------------------------------------------------------------------------------------------------------------------------------|
|           |           |           |         |      |    |   |     |     | 308: 1912:1915                                                                                                                                  |
| Bony fish | Temperate | North Sea | 1000000 | 1977 | 25 | 0 | Yes | Yes | Perry, A. L., P. J. Low, J. R. Ellis and J. D. Reynolds. 2005. Climate change and distribution shifts in marine fishes. Science. 308: 1912:1915 |
| Bony fish | Temperate | North Sea | 1000000 | 1977 | 25 | 0 | Yes | Yes | Perry, A. L., P. J. Low, J. R. Ellis and J. D. Reynolds. 2005. Climate change and distribution shifts in marine fishes. Science. 308: 1912:1915 |
| Bony fish | Temperate | North Sea | 1000000 | 1977 | 25 | 0 | Yes | Yes | Perry, A. L., P. J. Low, J. R. Ellis and J. D. Reynolds. 2005. Climate change and distribution shifts in marine fishes. Science. 308: 1912:1915 |
| Bony fish | Temperate | North Sea | 1000000 | 1977 | 25 | 0 | Yes | Yes | Perry, A. L., P. J. Low, J. R. Ellis and J. D. Reynolds. 2005. Climate change and distribution shifts in marine fishes. Science. 308: 1912:1915 |
| Bony fish | Temperate | North Sea | 1000000 | 1977 | 25 | 0 | Yes | Yes | Perry, A. L., P. J. Low, J. R. Ellis and J. D. Reynolds. 2005. Climate change and distribution shifts in marine fishes. Science. 308: 1912:1915 |
| Bony fish | Temperate | North Sea | 1000000 | 1977 | 25 | 0 | Yes | Yes | Perry, A. L., P. J. Low, J. R. Ellis and J. D. Reynolds. 2005. Climate change and distribution shifts in marine fishes. Science. 308: 1912:1915 |
| Bony fish | Temperate | North Sea | 1000000 | 1977 | 25 | 0 | Yes | Yes | Perry, A. L., P. J. Low, J. R. Ellis and J. D. Reynolds. 2005. Climate change and distribution shifts in marine fishes. Science. 308: 1912:1915 |
| Bony fish | Temperate | North Sea | 1000000 | 1977 | 25 | 0 | Yes | Yes | Perry, A. L., P. J. Low, J. R. Ellis and J. D. Reynolds. 2005. Climate change and distribution shifts in marine fishes. Science. 308: 1912:1915 |

|               |           |           |         |      |    |   |     |     |                                                                                                                                                 |
|---------------|-----------|-----------|---------|------|----|---|-----|-----|-------------------------------------------------------------------------------------------------------------------------------------------------|
| Bony fish     | Temperate | North Sea | 1000000 | 1977 | 25 | 0 | Yes | Yes | Perry, A. L., P. J. Low, J. R. Ellis and J. D. Reynolds. 2005. Climate change and distribution shifts in marine fishes. Science. 308: 1912:1915 |
| Bony fish     | Temperate | North Sea | 1000000 | 1977 | 25 | 0 | Yes | Yes | Perry, A. L., P. J. Low, J. R. Ellis and J. D. Reynolds. 2005. Climate change and distribution shifts in marine fishes. Science. 308: 1912:1915 |
| Bony fish     | Temperate | North Sea | 1000000 | 1977 | 25 | 0 | Yes | Yes | Perry, A. L., P. J. Low, J. R. Ellis and J. D. Reynolds. 2005. Climate change and distribution shifts in marine fishes. Science. 308: 1912:1915 |
| Non-bony fish | Temperate | North Sea | 1000000 | 1977 | 25 | 0 | Yes | Yes | Perry, A. L., P. J. Low, J. R. Ellis and J. D. Reynolds. 2005. Climate change and distribution shifts in marine fishes. Science. 308: 1912:1915 |
| Bony fish     | Temperate | North Sea | 1000000 | 1977 | 25 | 0 | Yes | Yes | Perry, A. L., P. J. Low, J. R. Ellis and J. D. Reynolds. 2005. Climate change and distribution shifts in marine fishes. Science. 308: 1912:1915 |
| Bony fish     | Temperate | North Sea | 1000000 | 1977 | 25 | 0 | Yes | Yes | Perry, A. L., P. J. Low, J. R. Ellis and J. D. Reynolds. 2005. Climate change and distribution shifts in marine fishes. Science. 308: 1912:1915 |
| Bony fish     | Temperate | North Sea | 1000000 | 1977 | 25 | 0 | Yes | Yes | Perry, A. L., P. J. Low, J. R. Ellis and J. D. Reynolds. 2005. Climate change and distribution shifts in marine fishes. Science. 308: 1912:1915 |
| Bony fish     | Temperate | North Sea | 1000000 | 1977 | 25 | 0 | Yes | Yes | Perry, A. L., P. J. Low, J. R. Ellis and J. D. Reynolds. 2005. Climate change and distribution shifts in marine fishes. Science. 308: 1912:1915 |
| Non-bony fish | Temperate | North Sea | 1000000 | 1977 | 25 | 0 | Yes | Yes | Perry, A. L., P. J. Low, J. R. Ellis and J. D. Reynolds. 2005. Climate change and distribution shifts in marine fishes. Science. 308: 1912:1915 |

|               |           |                     |         |      |    |       |     |     |  |                                                                                                                                                                                  |
|---------------|-----------|---------------------|---------|------|----|-------|-----|-----|--|----------------------------------------------------------------------------------------------------------------------------------------------------------------------------------|
|               |           |                     |         |      |    |       |     |     |  | Reynolds. 2005. Climate change and distribution shifts in marine fishes. Science. 308: 1912:1915                                                                                 |
| Bony fish     | Temperate | North Sea           | 1000000 | 1977 | 25 | 0     | Yes | Yes |  | Perry, A. L., P. J. Low, J. R. Ellis and J. D. Reynolds. 2005. Climate change and distribution shifts in marine fishes. Science. 308: 1912:1915                                  |
| Bony fish     | Temperate | North Sea           | 1000000 | 1977 | 25 | -82.1 | Yes | Yes |  | Perry, A. L., P. J. Low, J. R. Ellis and J. D. Reynolds. 2005. Climate change and distribution shifts in marine fishes. Science. 308: 1912:1915                                  |
| Non-bony fish | Temperate | North Sea           | 1000000 | 1977 | 25 | -85.5 | Yes | Yes |  | Perry, A. L., P. J. Low, J. R. Ellis and J. D. Reynolds. 2005. Climate change and distribution shifts in marine fishes. Science. 308: 1912:1915                                  |
| Bony fish     | Temperate | North Sea           | 1000000 | 1977 | 25 | -54.4 | Yes | Yes |  | Perry, A. L., P. J. Low, J. R. Ellis and J. D. Reynolds. 2005. Climate change and distribution shifts in marine fishes. Science. 308: 1912:1915                                  |
| Bony fish     | Temperate | North Sea           | 1000000 | 1977 | 25 | -21.1 | Yes | Yes |  | Perry, A. L., P. J. Low, J. R. Ellis and J. D. Reynolds. 2005. Climate change and distribution shifts in marine fishes. Science. 308: 1912:1915                                  |
| Zooplankton   | Temperate | North-east Atlantic | 1000000 | 1958 | 45 | 9.9   | Yes | No  |  | Bonnet et al. 2005. An overview of Calanus helgolandicus ecology in European waters. Progress in Oceanography 65: 1-53                                                           |
| Zooplankton   | Temperate | North-east Atlantic | 1000000 | 1958 | 45 | 12.3  | Yes | No  |  | Bonnet et al. 2005. An overview of Calanus helgolandicus ecology in European waters. Progress in Oceanography 65: 1-53                                                           |
| Bony fish     | Temperate | Bering Sea          | 100000  | 1978 | 25 | 53.4  | No  | No  |  | Orensanz J., B. Ernst, D.A. Armstrong, P. Stabeno and P. Livingston 2004. Contraction of the geographic range of distribution of snow crab ( <i>Chionoecetes opilio</i> ) in the |

|                  |             |                    |         |      |    |     |     |     |                                                                                                                                                                                                                   |
|------------------|-------------|--------------------|---------|------|----|-----|-----|-----|-------------------------------------------------------------------------------------------------------------------------------------------------------------------------------------------------------------------|
|                  |             |                    |         |      |    |     |     |     | eastern Bering Sea: An environmental ratchet? CalCOFI Report 45: 65-79.                                                                                                                                           |
| Larval bony fish | Subtropical | North-west Pacific | 1000000 | 1951 | 52 | 3.2 | Yes | Yes | Hsieh, C., C.S., Reiss, R.P. Hewitt and G. Sugihara. 2008. Spatial analysis shows that fishing enhances the climatic sensitivity of marine fishes. Canadian Journal of Fisheries and Aquatic Sciences 65: 947-961 |
| Larval bony fish | Subtropical | North-west Pacific | 1000000 | 1951 | 52 | 2.3 | Yes | Yes | Hsieh, C., C.S., Reiss, R.P. Hewitt and G. Sugihara. 2008. Spatial analysis shows that fishing enhances the climatic sensitivity of marine fishes. Canadian Journal of Fisheries and Aquatic Sciences 65: 947-961 |
| Larval bony fish | Subtropical | North-west Pacific | 1000000 | 1951 | 52 | 3.2 | Yes | Yes | Hsieh, C., C.S., Reiss, R.P. Hewitt and G. Sugihara. 2008. Spatial analysis shows that fishing enhances the climatic sensitivity of marine fishes. Canadian Journal of Fisheries and Aquatic Sciences 65: 947-961 |
| Larval bony fish | Subtropical | North-west Pacific | 1000000 | 1951 | 52 | 3.2 | Yes | Yes | Hsieh, C., C.S., Reiss, R.P. Hewitt and G. Sugihara. 2008. Spatial analysis shows that fishing enhances the climatic sensitivity of marine fishes. Canadian Journal of Fisheries and Aquatic Sciences 65: 947-961 |
| Larval bony fish | Subtropical | North-west Pacific | 1000000 | 1951 | 52 | 2.3 | No  | Yes | Hsieh, C., C.S., Reiss, R.P. Hewitt and G. Sugihara. 2008. Spatial analysis shows that fishing enhances the climatic sensitivity of marine fishes. Canadian Journal of Fisheries and Aquatic Sciences 65: 947-961 |
| Larval bony fish | Subtropical | North-west Pacific | 1000000 | 1951 | 52 | 3.2 | No  | Yes | Hsieh, C., C.S., Reiss, R.P. Hewitt and G. Sugihara. 2008. Spatial analysis shows that fishing enhances the climatic sensitivity of marine fishes. Canadian Journal of Fisheries and Aquatic Sciences 65: 947-961 |
| Larval bony fish | Subtropical | North-west Pacific | 1000000 | 1951 | 52 | 5.1 | Yes | Yes | Hsieh, C., C.S., Reiss, R.P. Hewitt and G.                                                                                                                                                                        |



|                  |             |                    |         |      |    |     |     |     |  |                                                                                                                                                                                                                   |
|------------------|-------------|--------------------|---------|------|----|-----|-----|-----|--|-------------------------------------------------------------------------------------------------------------------------------------------------------------------------------------------------------------------|
| fish             |             | Pacific            |         |      |    |     |     |     |  | Sugihara. 2008. Spatial analysis shows that fishing enhances the climatic sensitivity of marine fishes. Canadian Journal of Fisheries and Aquatic Sciences 65: 947-961                                            |
| Larval bony fish | Subtropical | North-west Pacific | 1000000 | 1951 | 52 | 3.7 | Yes | Yes |  | Hsieh, C., C.S., Reiss, R.P. Hewitt and G. Sugihara. 2008. Spatial analysis shows that fishing enhances the climatic sensitivity of marine fishes. Canadian Journal of Fisheries and Aquatic Sciences 65: 947-961 |
| Larval bony fish | Subtropical | North-west Pacific | 1000000 | 1951 | 52 | 6.0 | Yes | Yes |  | Hsieh, C., C.S., Reiss, R.P. Hewitt and G. Sugihara. 2008. Spatial analysis shows that fishing enhances the climatic sensitivity of marine fishes. Canadian Journal of Fisheries and Aquatic Sciences 65: 947-961 |
| Larval bony fish | Subtropical | North-west Pacific | 1000000 | 1951 | 52 | 7.4 | Yes | Yes |  | Hsieh, C., C.S., Reiss, R.P. Hewitt and G. Sugihara. 2008. Spatial analysis shows that fishing enhances the climatic sensitivity of marine fishes. Canadian Journal of Fisheries and Aquatic Sciences 65: 947-961 |
| Larval bony fish | Subtropical | North-west Pacific | 1000000 | 1951 | 52 | 7.4 | Yes | Yes |  | Hsieh, C., C.S., Reiss, R.P. Hewitt and G. Sugihara. 2008. Spatial analysis shows that fishing enhances the climatic sensitivity of marine fishes. Canadian Journal of Fisheries and Aquatic Sciences 65: 947-961 |
| Larval bony fish | Subtropical | North-west Pacific | 1000000 | 1951 | 52 | 7.4 | No  | Yes |  | Hsieh, C., C.S., Reiss, R.P. Hewitt and G. Sugihara. 2008. Spatial analysis shows that fishing enhances the climatic sensitivity of marine fishes. Canadian Journal of Fisheries and Aquatic Sciences 65: 947-961 |
| Larval bony fish | Subtropical | North-west Pacific | 1000000 | 1951 | 52 | 7.4 | No  | Yes |  | Hsieh, C., C.S., Reiss, R.P. Hewitt and G. Sugihara. 2008. Spatial analysis shows that fishing enhances the climatic sensitivity of marine fishes. Canadian Journal of Fisheries and Aquatic Sciences 65: 947-961 |

|                  |             |                    |         |      |    |      |     |     |  |                                                                                                                                                                                                                   |
|------------------|-------------|--------------------|---------|------|----|------|-----|-----|--|-------------------------------------------------------------------------------------------------------------------------------------------------------------------------------------------------------------------|
|                  |             |                    |         |      |    |      |     |     |  | and Aquatic Sciences 65: 947-961                                                                                                                                                                                  |
| Larval bony fish | Subtropical | North-west Pacific | 1000000 | 1951 | 52 | 7.4  | No  | Yes |  | Hsieh, C., C.S., Reiss, R.P. Hewitt and G. Sugihara. 2008. Spatial analysis shows that fishing enhances the climatic sensitivity of marine fishes. Canadian Journal of Fisheries and Aquatic Sciences 65: 947-961 |
| Larval bony fish | Subtropical | North-west Pacific | 1000000 | 1951 | 52 | 7.9  | No  | Yes |  | Hsieh, C., C.S., Reiss, R.P. Hewitt and G. Sugihara. 2008. Spatial analysis shows that fishing enhances the climatic sensitivity of marine fishes. Canadian Journal of Fisheries and Aquatic Sciences 65: 947-961 |
| Larval bony fish | Subtropical | North-west Pacific | 1000000 | 1951 | 52 | 8.8  | Yes | Yes |  | Hsieh, C., C.S., Reiss, R.P. Hewitt and G. Sugihara. 2008. Spatial analysis shows that fishing enhances the climatic sensitivity of marine fishes. Canadian Journal of Fisheries and Aquatic Sciences 65: 947-961 |
| Larval bony fish | Subtropical | North-west Pacific | 1000000 | 1951 | 52 | 7.4  | Yes | Yes |  | Hsieh, C., C.S., Reiss, R.P. Hewitt and G. Sugihara. 2008. Spatial analysis shows that fishing enhances the climatic sensitivity of marine fishes. Canadian Journal of Fisheries and Aquatic Sciences 65: 947-961 |
| Larval bony fish | Subtropical | North-west Pacific | 1000000 | 1951 | 52 | 10.2 | Yes | Yes |  | Hsieh, C., C.S., Reiss, R.P. Hewitt and G. Sugihara. 2008. Spatial analysis shows that fishing enhances the climatic sensitivity of marine fishes. Canadian Journal of Fisheries and Aquatic Sciences 65: 947-961 |
| Larval bony fish | Subtropical | North-west Pacific | 1000000 | 1951 | 52 | 9.3  | Yes | Yes |  | Hsieh, C., C.S., Reiss, R.P. Hewitt and G. Sugihara. 2008. Spatial analysis shows that fishing enhances the climatic sensitivity of marine fishes. Canadian Journal of Fisheries and Aquatic Sciences 65: 947-961 |
| Larval bony fish | Subtropical | North-west Pacific | 1000000 | 1951 | 52 | 10.6 | Yes | Yes |  | Hsieh, C., C.S., Reiss, R.P. Hewitt and G. Sugihara. 2008. Spatial analysis shows that                                                                                                                            |

|                  |             |                    |         |      |    |       |     |     |  |                                                                                                                                                                                                                   |
|------------------|-------------|--------------------|---------|------|----|-------|-----|-----|--|-------------------------------------------------------------------------------------------------------------------------------------------------------------------------------------------------------------------|
|                  |             |                    |         |      |    |       |     |     |  | fishing enhances the climatic sensitivity of marine fishes. Canadian Journal of Fisheries and Aquatic Sciences 65: 947-961                                                                                        |
| Larval bony fish | Subtropical | North-west Pacific | 1000000 | 1951 | 52 | 13.4  | Yes | Yes |  | Hsieh, C., C.S., Reiss, R.P. Hewitt and G. Sugihara. 2008. Spatial analysis shows that fishing enhances the climatic sensitivity of marine fishes. Canadian Journal of Fisheries and Aquatic Sciences 65: 947-961 |
| Larval bony fish | Subtropical | North-west Pacific | 1000000 | 1951 | 52 | 17.6  | Yes | Yes |  | Hsieh, C., C.S., Reiss, R.P. Hewitt and G. Sugihara. 2008. Spatial analysis shows that fishing enhances the climatic sensitivity of marine fishes. Canadian Journal of Fisheries and Aquatic Sciences 65: 947-961 |
| Larval bony fish | Subtropical | North-west Pacific | 1000000 | 1951 | 52 | 0     | No  | Yes |  | Hsieh, C., C.S., Reiss, R.P. Hewitt and G. Sugihara. 2008. Spatial analysis shows that fishing enhances the climatic sensitivity of marine fishes. Canadian Journal of Fisheries and Aquatic Sciences 65: 947-961 |
| Larval bony fish | Subtropical | North-west Pacific | 1000000 | 1951 | 52 | 0     | No  | Yes |  | Hsieh, C., C.S., Reiss, R.P. Hewitt and G. Sugihara. 2008. Spatial analysis shows that fishing enhances the climatic sensitivity of marine fishes. Canadian Journal of Fisheries and Aquatic Sciences 65: 947-961 |
| Larval bony fish | Subtropical | North-west Pacific | 1000000 | 1951 | 52 | -17.1 | Yes | Yes |  | Hsieh, C., C.S., Reiss, R.P. Hewitt and G. Sugihara. 2008. Spatial analysis shows that fishing enhances the climatic sensitivity of marine fishes. Canadian Journal of Fisheries and Aquatic Sciences 65: 947-961 |
| Larval bony fish | Subtropical | North-west Pacific | 1000000 | 1951 | 52 | -3.2  | Yes | Yes |  | Hsieh, C., C.S., Reiss, R.P. Hewitt and G. Sugihara. 2008. Spatial analysis shows that fishing enhances the climatic sensitivity of marine fishes. Canadian Journal of Fisheries and Aquatic Sciences 65: 947-961 |

|                   |             |                    |         |      |    |       |     |     |                                                                                                                                                                                                                   |
|-------------------|-------------|--------------------|---------|------|----|-------|-----|-----|-------------------------------------------------------------------------------------------------------------------------------------------------------------------------------------------------------------------|
| Larval bony fish  | Subtropical | North-west Pacific | 1000000 | 1951 | 52 | -2.3  | Yes | Yes | Hsieh, C., C.S., Reiss, R.P. Hewitt and G. Sugihara. 2008. Spatial analysis shows that fishing enhances the climatic sensitivity of marine fishes. Canadian Journal of Fisheries and Aquatic Sciences 65: 947-961 |
| Larval bony fish  | Subtropical | North-west Pacific | 1000000 | 1951 | 52 | -3.2  | No  | Yes | Hsieh, C., C.S., Reiss, R.P. Hewitt and G. Sugihara. 2008. Spatial analysis shows that fishing enhances the climatic sensitivity of marine fishes. Canadian Journal of Fisheries and Aquatic Sciences 65: 947-961 |
| Larval bony fish  | Subtropical | North-west Pacific | 1000000 | 1951 | 52 | -1.4  | Yes | Yes | Hsieh, C., C.S., Reiss, R.P. Hewitt and G. Sugihara. 2008. Spatial analysis shows that fishing enhances the climatic sensitivity of marine fishes. Canadian Journal of Fisheries and Aquatic Sciences 65: 947-961 |
| Bony fish         | Temperate   | Bering Sea         | 1000000 | 1982 | 25 | -28.0 | Yes | Yes | Mueter, F.J. and M.A. Litzow. 2008. Sea ice retreat alters the biogeography of the bering sea continental shelf. Ecological Applications 18: 309-302                                                              |
| Bony fish         | Temperate   | Bering Sea         | 1000000 | 1982 | 25 | -28.0 | Yes | Yes | Mueter, F.J. and M.A. Litzow. 2008. Sea ice retreat alters the biogeography of the bering sea continental shelf. Ecological Applications 18: 309-302                                                              |
| Bony fish         | Temperate   | Bering Sea         | 1000000 | 1982 | 25 | -15.2 | Yes | Yes | Mueter, F.J. and M.A. Litzow. 2008. Sea ice retreat alters the biogeography of the bering sea continental shelf. Ecological Applications 18: 309-302                                                              |
| Benthic crustacea | Temperate   | Bering Sea         | 1000000 | 1982 | 25 | -15.2 | Yes | Yes | Mueter, F.J. and M.A. Litzow. 2008. Sea ice retreat alters the biogeography of the bering sea continental shelf. Ecological Applications 18: 309-302                                                              |
| Bony fish         | Temperate   | Bering Sea         | 1000000 | 1982 | 25 | -4.0  | Yes | Yes | Mueter, F.J. and M.A. Litzow. 2008. Sea ice retreat alters the biogeography of the bering                                                                                                                         |

|                   |           |            |         |      |    |      |     |     |                                                                                                                                                      |
|-------------------|-----------|------------|---------|------|----|------|-----|-----|------------------------------------------------------------------------------------------------------------------------------------------------------|
|                   |           |            |         |      |    |      |     |     | sea continental shelf. Ecological Applications 18: 309-302                                                                                           |
| Bony fish         | Temperate | Bering Sea | 1000000 | 1982 | 25 | -2.8 | Yes | Yes | Mueter, F.J. and M.A. Litzow. 2008. Sea ice retreat alters the biogeography of the bering sea continental shelf. Ecological Applications 18: 309-302 |
| Benthic crustacea | Temperate | Bering Sea | 1000000 | 1982 | 25 | -2.0 | Yes | Yes | Mueter, F.J. and M.A. Litzow. 2008. Sea ice retreat alters the biogeography of the bering sea continental shelf. Ecological Applications 18: 309-302 |
| Bony fish         | Temperate | Bering Sea | 1000000 | 1982 | 25 | 0    | Yes | No  | Mueter, F.J. and M.A. Litzow. 2008. Sea ice retreat alters the biogeography of the bering sea continental shelf. Ecological Applications 18: 309-302 |
| Bony fish         | Temperate | Bering Sea | 1000000 | 1982 | 25 | 0    | Yes | No  | Mueter, F.J. and M.A. Litzow. 2008. Sea ice retreat alters the biogeography of the bering sea continental shelf. Ecological Applications 18: 309-302 |
| Bony fish         | Temperate | Bering Sea | 1000000 | 1982 | 25 | 0    | Yes | No  | Mueter, F.J. and M.A. Litzow. 2008. Sea ice retreat alters the biogeography of the bering sea continental shelf. Ecological Applications 18: 309-302 |
| Bony fish         | Temperate | Bering Sea | 1000000 | 1982 | 25 | 0    | Yes | No  | Mueter, F.J. and M.A. Litzow. 2008. Sea ice retreat alters the biogeography of the bering sea continental shelf. Ecological Applications 18: 309-302 |
| Bony fish         | Temperate | Bering Sea | 1000000 | 1982 | 25 | 0    | Yes | No  | Mueter, F.J. and M.A. Litzow. 2008. Sea ice retreat alters the biogeography of the bering sea continental shelf. Ecological Applications 18: 309-302 |
| Bony fish         | Temperate | Bering Sea | 1000000 | 1982 | 25 | 0    | Yes | No  | Mueter, F.J. and M.A. Litzow. 2008. Sea ice retreat alters the biogeography of the bering sea continental shelf. Ecological Applications 18: 309-302 |

|           |           |            |         |      |    |      |     |     |                                                                                                                                                      |
|-----------|-----------|------------|---------|------|----|------|-----|-----|------------------------------------------------------------------------------------------------------------------------------------------------------|
|           |           |            |         |      |    |      |     |     | 18: 309-302                                                                                                                                          |
| Bony fish | Temperate | Bering Sea | 1000000 | 1982 | 25 | 0.8  | Yes | Yes | Mueter, F.J. and M.A. Litzow. 2008. Sea ice retreat alters the biogeography of the bering sea continental shelf. Ecological Applications 18: 309-302 |
| Bony fish | Temperate | Bering Sea | 1000000 | 1982 | 25 | 1.2  | Yes | Yes | Mueter, F.J. and M.A. Litzow. 2008. Sea ice retreat alters the biogeography of the bering sea continental shelf. Ecological Applications 18: 309-302 |
| Bony fish | Temperate | Bering Sea | 1000000 | 1982 | 25 | 2.4  | Yes | Yes | Mueter, F.J. and M.A. Litzow. 2008. Sea ice retreat alters the biogeography of the bering sea continental shelf. Ecological Applications 18: 309-302 |
| Bony fish | Temperate | Bering Sea | 1000000 | 1982 | 25 | 6.4  | Yes | Yes | Mueter, F.J. and M.A. Litzow. 2008. Sea ice retreat alters the biogeography of the bering sea continental shelf. Ecological Applications 18: 309-302 |
| Bony fish | Temperate | Bering Sea | 1000000 | 1982 | 25 | 8.4  | Yes | Yes | Mueter, F.J. and M.A. Litzow. 2008. Sea ice retreat alters the biogeography of the bering sea continental shelf. Ecological Applications 18: 309-302 |
| Bony fish | Temperate | Bering Sea | 1000000 | 1982 | 25 | 9.2  | Yes | Yes | Mueter, F.J. and M.A. Litzow. 2008. Sea ice retreat alters the biogeography of the bering sea continental shelf. Ecological Applications 18: 309-302 |
| Bony fish | Temperate | Bering Sea | 1000000 | 1982 | 25 | 10.8 | Yes | Yes | Mueter, F.J. and M.A. Litzow. 2008. Sea ice retreat alters the biogeography of the bering sea continental shelf. Ecological Applications 18: 309-302 |
| Bony fish | Temperate | Bering Sea | 1000000 | 1982 | 25 | 13.6 | Yes | Yes | Mueter, F.J. and M.A. Litzow. 2008. Sea ice retreat alters the biogeography of the bering sea continental shelf. Ecological Applications 18: 309-302 |

|                   |           |            |         |      |    |      |     |     |                                                                                                                                                      |
|-------------------|-----------|------------|---------|------|----|------|-----|-----|------------------------------------------------------------------------------------------------------------------------------------------------------|
| Bony fish         | Temperate | Bering Sea | 1000000 | 1982 | 25 | 13.6 | Yes | Yes | Mueter, F.J. and M.A. Litzow. 2008. Sea ice retreat alters the biogeography of the bering sea continental shelf. Ecological Applications 18: 309-302 |
| Bony fish         | Temperate | Bering Sea | 1000000 | 1982 | 25 | 15.6 | Yes | Yes | Mueter, F.J. and M.A. Litzow. 2008. Sea ice retreat alters the biogeography of the bering sea continental shelf. Ecological Applications 18: 309-302 |
| Bony fish         | Temperate | Bering Sea | 1000000 | 1982 | 25 | 16.0 | Yes | Yes | Mueter, F.J. and M.A. Litzow. 2008. Sea ice retreat alters the biogeography of the bering sea continental shelf. Ecological Applications 18: 309-302 |
| Bony fish         | Temperate | Bering Sea | 1000000 | 1982 | 25 | 16.4 | Yes | Yes | Mueter, F.J. and M.A. Litzow. 2008. Sea ice retreat alters the biogeography of the bering sea continental shelf. Ecological Applications 18: 309-302 |
| Bony fish         | Temperate | Bering Sea | 1000000 | 1982 | 25 | 18.4 | Yes | Yes | Mueter, F.J. and M.A. Litzow. 2008. Sea ice retreat alters the biogeography of the bering sea continental shelf. Ecological Applications 18: 309-302 |
| Benthic crustacea | Temperate | Bering Sea | 1000000 | 1982 | 25 | 18.8 | Yes | Yes | Mueter, F.J. and M.A. Litzow. 2008. Sea ice retreat alters the biogeography of the bering sea continental shelf. Ecological Applications 18: 309-302 |
| Bony fish         | Temperate | Bering Sea | 1000000 | 1982 | 25 | 19.2 | Yes | Yes | Mueter, F.J. and M.A. Litzow. 2008. Sea ice retreat alters the biogeography of the bering sea continental shelf. Ecological Applications 18: 309-302 |
| Bony fish         | Temperate | Bering Sea | 1000000 | 1982 | 25 | 20.4 | Yes | Yes | Mueter, F.J. and M.A. Litzow. 2008. Sea ice retreat alters the biogeography of the bering sea continental shelf. Ecological Applications 18: 309-302 |
| Bony fish         | Temperate | Bering Sea | 1000000 | 1982 | 25 | 22.0 | Yes | Yes | Mueter, F.J. and M.A. Litzow. 2008. Sea ice                                                                                                          |

|                   |           |            |         |      |    |      |     |     |  |                                                                                                                                                      |
|-------------------|-----------|------------|---------|------|----|------|-----|-----|--|------------------------------------------------------------------------------------------------------------------------------------------------------|
|                   |           |            |         |      |    |      |     |     |  | retreat alters the biogeography of the bering sea continental shelf. Ecological Applications 18: 309-302                                             |
| Bony fish         | Temperate | Bering Sea | 1000000 | 1982 | 25 | 22.8 | Yes | Yes |  | Mueter, F.J. and M.A. Litzow. 2008. Sea ice retreat alters the biogeography of the bering sea continental shelf. Ecological Applications 18: 309-302 |
| Bony fish         | Temperate | Bering Sea | 1000000 | 1982 | 25 | 24.0 | Yes | Yes |  | Mueter, F.J. and M.A. Litzow. 2008. Sea ice retreat alters the biogeography of the bering sea continental shelf. Ecological Applications 18: 309-302 |
| Benthic crustacea | Temperate | Bering Sea | 1000000 | 1982 | 25 | 24.8 | Yes | Yes |  | Mueter, F.J. and M.A. Litzow. 2008. Sea ice retreat alters the biogeography of the bering sea continental shelf. Ecological Applications 18: 309-302 |
| Bony fish         | Temperate | Bering Sea | 1000000 | 1982 | 25 | 26.4 | Yes | Yes |  | Mueter, F.J. and M.A. Litzow. 2008. Sea ice retreat alters the biogeography of the bering sea continental shelf. Ecological Applications 18: 309-302 |
| Bony fish         | Temperate | Bering Sea | 1000000 | 1982 | 25 | 30.4 | Yes | Yes |  | Mueter, F.J. and M.A. Litzow. 2008. Sea ice retreat alters the biogeography of the bering sea continental shelf. Ecological Applications 18: 309-302 |
| Bony fish         | Temperate | Bering Sea | 1000000 | 1982 | 25 | 30.4 | Yes | Yes |  | Mueter, F.J. and M.A. Litzow. 2008. Sea ice retreat alters the biogeography of the bering sea continental shelf. Ecological Applications 18: 309-302 |
| Non-bony fish     | Temperate | Bering Sea | 1000000 | 1982 | 25 | 36.0 | Yes | Yes |  | Mueter, F.J. and M.A. Litzow. 2008. Sea ice retreat alters the biogeography of the bering sea continental shelf. Ecological Applications 18: 309-302 |
| Bony fish         | Temperate | Bering Sea | 1000000 | 1982 | 25 | 39.2 | Yes | Yes |  | Mueter, F.J. and M.A. Litzow. 2008. Sea ice retreat alters the biogeography of the bering                                                            |



|           |           |            |         |      |    |      |     |     |                                                                                                                                                      |
|-----------|-----------|------------|---------|------|----|------|-----|-----|------------------------------------------------------------------------------------------------------------------------------------------------------|
|           |           |            |         |      |    |      |     |     | sea continental shelf. Ecological Applications 18: 309-302                                                                                           |
| Bony fish | Temperate | Bering Sea | 1000000 | 1982 | 25 | 61.2 | Yes | Yes | Mueter, F.J. and M.A. Litzow. 2008. Sea ice retreat alters the biogeography of the bering sea continental shelf. Ecological Applications 18: 309-302 |
| Bony fish | Temperate | Bering Sea | 1000000 | 1982 | 25 | 94.8 | Yes | Yes | Mueter, F.J. and M.A. Litzow. 2008. Sea ice retreat alters the biogeography of the bering sea continental shelf. Ecological Applications 18: 309-302 |

## Global imprint of climate change on marine life

**Supplementary Table S7.** Observations of phenology shift in days dec<sup>-1</sup> by season. Taxa = taxonomic group, Biome, Region, Study Area = size of study site, Start Year = first year of data series, Timespan, Alt Drivers? = other drivers of change considered, Stat Tests = statistical tests applied to show a relationship with changing climate. NH = Northern Hemisphere, SH = Southern Hemisphere.

| Taxa                                                             | Biome     | Region              | Study Area | Start Year | Time Span | Days dec <sup>-1</sup> | Alt Drivers | Stat Tests | Citation                                                                                                                                                                                                                                                     |
|------------------------------------------------------------------|-----------|---------------------|------------|------------|-----------|------------------------|-------------|------------|--------------------------------------------------------------------------------------------------------------------------------------------------------------------------------------------------------------------------------------------------------------|
| SPRING (NH: March, April, May; SH: September, October, November) |           |                     |            |            |           |                        |             |            |                                                                                                                                                                                                                                                              |
| Benthic crustacea                                                | Temperate | North Sea           | 1          | 1973       | 29        | -31.0                  | No          | Yes        | Philippart, C. J. M., et al. 2003. Climate-related changes in recruitment of the bivalve <i>Macoma balthica</i> . <i>Limnology and Oceanography</i> 48:2171-2185.                                                                                            |
| Zooplankton                                                      | Temperate | North Sea           | 1          | 1975       | 30        | -23.3                  | No          | Yes        | Schluter, M.H., et al. 2010. Phenological shifts in three interacting zooplankton groups in relation to climate change. <i>Global Change Biology</i> doi: 10.1111/j.1365-2486.2010.02246.x                                                                   |
| Bony fish                                                        | Temperate | North-west Atlantic | 1          | 1954       | 39        | -21.3                  | Yes         | Yes        | Juanes, F., S. Gephard and K.F. Beland. 2004. Long-term changes in migration timing of adult Atlantic salmon ( <i>Salmo salar</i> ) at the southern edge of the species distribution. <i>Canadian journal of Fisheries and Aquatic Sciences</i> 61:2392-2400 |
| Zooplankton                                                      | Temperate | North-east Pacific  | 1          | 1975       | 22        | -18.7                  | No          | No         | Bertram, D.F., D.L. Mackas, and S.M. McKinnell. 2001. The seasonal cycle                                                                                                                                                                                     |

|                  |           |                     |        |      |    |       |     |     |                                                                                                                                                                                                                                                |
|------------------|-----------|---------------------|--------|------|----|-------|-----|-----|------------------------------------------------------------------------------------------------------------------------------------------------------------------------------------------------------------------------------------------------|
|                  |           |                     |        |      |    |       |     |     | revisited: interannual variation and ecosystem consequences. Progress in Oceanography 49: 283-307.                                                                                                                                             |
| Larval bony fish | Temperate | North Sea           | 100000 | 1958 | 45 | -12.9 | Yes | Yes | Edwards, M. and A.J. Richardson. 2004. Impact of climate change on marine pelagic phenology and trophic mismatch. Nature 430: 881-884.                                                                                                         |
| Zooplankton      | Temperate | North-east Pacific  | 1      | 1975 | 24 | -12.8 | No  | No  | Bertram, D.F., D.L. Mackas, and S.M. McKinnell. 2001. The seasonal cycle revisited: interannual variation and ecosystem consequences. Progress in Oceanography 49: 283-307.                                                                    |
| Zooplankton      | Temperate | North Sea           | 100000 | 1958 | 45 | -10.3 | Yes | Yes | Edwards, M. and A.J. Richardson. 2004. Impact of climate change on marine pelagic phenology and trophic mismatch. Nature 430: 881-884.                                                                                                         |
| Benthic molluscs | Temperate | North-east Atlantic | 100    | 1946 | 62 | -10.2 | No  | No  | Moore, P.J., R.C. Thompson and S.J. Hawkins. 2010. Phenological changes in intertidal con-specific gastropods in response to climate warming. Global Change Biology                                                                            |
| Benthic molluscs | Temperate | North Sea           | 100    | 1969 | 39 | -10.0 | No  | No  | Beukema, J.J., Dekker, R., Jansen, J.M. 2009. Some like it cold: populations of the tellinid bivalve <i>Macoma balthica</i> (L.) suffer in various ways from a warming climate. Marine Ecology Progress Series 384: 135-145                    |
| Larval bony fish | Temperate | North Sea           | 100000 | 1958 | 45 | -9.5  | Yes | Yes | Edwards, M. and A.J. Richardson. 2004. Impact of climate change on marine pelagic phenology and trophic mismatch. Nature 430: 881-884.                                                                                                         |
| Zooplankton      | Temperate | North Sea           | 1      | 1975 | 30 | -9.3  | No  | Yes | Schluter, M.H., A. Merico, M. Reginatto, M. Boersma, K.H. Wiltshire and W. Greve. 2010. Phenological shifts in three interacting zooplankton groups in relation to climate change. Global Change Biology doi: 10.1111/j.1365-2486.2010.02246.x |

|               |           |                     |        |      |    |      |     |     |                                                                                                                                                                                                                                                       |
|---------------|-----------|---------------------|--------|------|----|------|-----|-----|-------------------------------------------------------------------------------------------------------------------------------------------------------------------------------------------------------------------------------------------------------|
| Bony fish     | Temperate | North-west Atlantic | 1      | 1967 | 33 | -9.1 | Yes | Yes | Juanes, F., S. Gephard and K.F. Beland. 2004. Long-term changes in migration timing of adult Atlantic salmon ( <i>Salmo salar</i> ) at the southern edge of the species distribution. Canadian journal of Fisheries and Aquatic Sciences 61:2392-2400 |
| Phytoplankton | Temperate | North Sea           | 100000 | 1958 | 45 | -8.6 | Yes | Yes | Edwards, M. and A.J. Richardson. 2004. Impact of climate change on marine pelagic phenology and trophic mismatch. Nature 430: 881-884.                                                                                                                |
| Seabirds      | Temperate | North Sea           | 10     | 1971 | 36 | -8.4 | No  | No  | Wanless, S., M. Frederiksen, J. Walton and M.P. Harris. 2009. Long-term changes in breeding phenology at two seabird colonies in the western North Sea. Ibis 151:274-285.                                                                             |
| Phytoplankton | Temperate | North Sea           | 100000 | 1958 | 45 | -8.3 | Yes | Yes | Edwards, M. and A.J. Richardson. 2004. Impact of climate change on marine pelagic phenology and trophic mismatch. Nature 430: 881-884.                                                                                                                |
| Phytoplankton | Temperate | North Sea           | 100000 | 1958 | 45 | -7.5 | Yes | Yes | Edwards, M. and A.J. Richardson. 2004. Impact of climate change on marine pelagic phenology and trophic mismatch. Nature 430: 881-884.                                                                                                                |
| Phytoplankton | Temperate | North Sea           | 100000 | 1958 | 45 | -7.2 | Yes | Yes | Edwards, M. and A.J. Richardson. 2004. Impact of climate change on marine pelagic phenology and trophic mismatch. Nature 430: 881-884.                                                                                                                |
| Bony fish     | Temperate | North-west Atlantic | 1      | 1978 | 24 | -7.1 | Yes | Yes | Juanes, F., S. Gephard and K.F. Beland. 2004. Long-term changes in migration timing of adult Atlantic salmon ( <i>Salmo salar</i> ) at the southern edge of the species distribution. Canadian journal of Fisheries and Aquatic Sciences 61:2392-2400 |
| Zooplankton   | Temperate | North Sea           | 100000 | 1958 | 45 | -6.7 | Yes | Yes | Edwards, M. and A.J. Richardson. 2004. Impact of climate change on marine pelagic phenology and trophic mismatch. Nature 430:                                                                                                                         |

|           |             |                     |     |      |    |      |     |     |                                                                                                                                                                                                                                                              |
|-----------|-------------|---------------------|-----|------|----|------|-----|-----|--------------------------------------------------------------------------------------------------------------------------------------------------------------------------------------------------------------------------------------------------------------|
|           |             |                     |     |      |    |      |     |     | 881-884.                                                                                                                                                                                                                                                     |
| Bony fish | Temperate   | North-west Atlantic | 1   | 1978 | 23 | -5.0 | Yes | Yes | Juanes, F., S. Gephard and K.F. Beland. 2004. Long-term changes in migration timing of adult Atlantic salmon ( <i>Salmo salar</i> ) at the southern edge of the species distribution. Canadian journal of Fisheries and Aquatic Sciences 61:2392-2400        |
| Bony fish | Temperate   | North-east Atlantic | 100 | 1978 | 31 | -4.8 | Yes | Yes | Kennedy, R. J. and W. W. Crozier. 2010. Evidence of changing migratory patterns of wild Atlantic salmon <i>Salmo salar</i> smolts in the River Bush, Northern Ireland, and possible associations with climate change. Journal of Fish Biology. 76: 1786-1805 |
| Bony fish | Temperate   | North-west Atlantic | 1   | 1978 | 23 | -4.5 | Yes | Yes | Juanes, F., S. Gephard and K.F. Beland. 2004. Long-term changes in migration timing of adult Atlantic salmon ( <i>Salmo salar</i> ) at the southern edge of the species distribution. Canadian journal of Fisheries and Aquatic Sciences 61:2392-2400        |
| Seabirds  | Temperate   | North-east Pacific  | 10  | 1975 | 25 | -4.4 | No  | Yes | Bertram, D.F., D.L. Mackas, and S.M. McKinnell. 2001. The seasonal cycle revisited: interannual variation and ecosystem consequences. Progress in Oceanography 49: 283-307.                                                                                  |
| Seabirds  | Temperate   | North-east Atlantic | 1   | 1977 | 30 | -2.8 | Yes | Yes | D'Alba, L., P. Monaghan, and R.G. Nager. 2010. Advances in laying date and increasing population size suggest positive responses to climate change in Common Eiders <i>Somateria mollissima</i> in Iceland. Ibis 152:19-28.                                  |
| Seabirds  | Temperate   | North Sea           | 10  | 1972 | 35 | -2.7 | No  | No  | Wanless, S., M. Frederiksen, J. Walton and M.P. Harris. 2009. Long-term changes in breeding phenology at two seabird colonies in the western North Sea. Ibis 151:274-285.                                                                                    |
| Seabirds  | Subtropical | North-east Pacific  | 10  | 1988 | 19 | -2.4 | No  | Yes | Schroeder, I.D., W.J. Sydeman, N. Sarkar, S.A. Thompson, S.J. Bograd and F.B.                                                                                                                                                                                |

|           |           |                     |         |      |    |      |     |     |                                                                                                                                                                                                                                           |
|-----------|-----------|---------------------|---------|------|----|------|-----|-----|-------------------------------------------------------------------------------------------------------------------------------------------------------------------------------------------------------------------------------------------|
|           |           |                     |         |      |    |      |     |     | Schwing. 2009. Winter pre-conditioning of seabird phenology in the California Current. <i>Marine Ecology Progress Series</i> 393:211-223.                                                                                                 |
| Seabirds  | Temperate | North Sea           | 10      | 1969 | 34 | -2.3 | Yes | Yes | Frederiksen, M., M.P. Harris, F. Daunt, P. Rothery, and S. Wanless. 2004. Scale-dependent climate signals drive breeding phenology of three seabird species. <i>Global Change Biology</i> 10: 1214-1221.                                  |
| Bony fish | Temperate | North-east Atlantic | 1000000 | 1967 | 39 | -2.0 | No  | Yes | Dufour, F., H. Arrizabalaga, X. Irigoien and J. Santiago. 2010. Climate impacts on albacore and bluefin tunas migrations phenology and spatial distribution. <i>Progress in Oceanography</i> 86: 283-290                                  |
| Seabirds  | Temperate | North Sea           | 10      | 1972 | 35 | -1.9 | No  | No  | Wanless, S., M. Frederiksen, J. Walton and M.P. Harris. 2009. Long-term changes in breeding phenology at two seabird colonies in the western North Sea. <i>Ibis</i> 151:274-285.                                                          |
| Seabirds  | Temperate | Irish Sea           | 10      | 1973 | 36 | -1.7 | Yes | Yes | Votier, S.C., B.J. Hatchwell, M. Mears and T.R. Birkhead. 2009. Changes in the timing of egg-laying of a colonial seabird in relation to population size and environmental conditions. <i>Marine Ecology Progress Series</i> 393:225-233. |
| Seabirds  | Temperate | North Sea           | 10      | 1972 | 35 | -1.6 | No  | No  | Wanless, S., M. Frederiksen, J. Walton and M.P. Harris. 2009. Long-term changes in breeding phenology at two seabird colonies in the western North Sea. <i>Ibis</i> 151:274-285.                                                          |
| Seabirds  | Temperate | North Sea           | 10      | 1979 | 28 | -1.5 | No  | No  | Wanless, S., M. Frederiksen, J. Walton and M.P. Harris. 2009. Long-term changes in breeding phenology at two seabird colonies in the western North Sea. <i>Ibis</i> 151:274-285.                                                          |
| Seabirds  | Temperate | North Sea           | 10      | 1979 | 28 | -1.2 | No  | No  | Wanless, S., M. Frederiksen, J. Walton and M.P. Harris. 2009. Long-term changes in breeding phenology at two seabird colonies in the western North Sea. <i>Ibis</i> 151:274-285.                                                          |
| Seabirds  | Temperate | North Sea           | 10      | 1983 | 24 | -0.8 | No  | No  | Wanless, S., M. Frederiksen, J. Walton and                                                                                                                                                                                                |

|               |           |            |         |      |    |      |    |     |                                                                                                                                                                                            |
|---------------|-----------|------------|---------|------|----|------|----|-----|--------------------------------------------------------------------------------------------------------------------------------------------------------------------------------------------|
|               |           |            |         |      |    |      |    |     | M.P. Harris. 2009. Long-term changes in breeding phenology at two seabird colonies in the western North Sea. <i>Ibis</i> 151:274-285.                                                      |
| Seabirds      | Temperate | North Sea  | 10      | 1976 | 31 | -0.5 | No | No  | Wanless, S., M. Frederiksen, J. Walton and M.P. Harris. 2009. Long-term changes in breeding phenology at two seabird colonies in the western North Sea. <i>Ibis</i> 151:274-285.           |
| Seabirds      | Temperate | North Sea  | 10      | 1976 | 31 | -0.2 | No | No  | Wanless, S., M. Frederiksen, J. Walton and M.P. Harris. 2009. Long-term changes in breeding phenology at two seabird colonies in the western North Sea. <i>Ibis</i> 151:274-285.           |
| Bony fish     | Temperate | Baltic Sea | 1000000 | 1951 | 48 | -0.1 | No | Yes | Ahas, R. and A. Aasa 2006. The effects of climate change on the phenology of selected Estonian plant, bird and fish populations. <i>International Journal of Biometeorology</i> 51:17:26   |
| Phytoplankton | Temperate | North Sea  | 1       | 1973 | 29 | 0    | No | Yes | Philippart, C. J. M., et al. 2003. Climate-related changes in recruitment of the bivalve <i>Macoma balthica</i> . <i>Limnology and Oceanography</i> 48:2171-2185.                          |
| Zooplankton   | Temperate | North Sea  | 1       | 1975 | 30 | 0    | No | Yes | Schluter, M.H., et al. 2010. Phenological shifts in three interacting zooplankton groups in relation to climate change. <i>Global Change Biology</i> doi: 10.1111/j.1365-2486.2010.02246.x |
| Seabirds      | Temperate | North Sea  | 10      | 1972 | 35 | 0.1  | No | No  | Wanless, S., M. Frederiksen, J. Walton and M.P. Harris. 2009. Long-term changes in breeding phenology at two seabird colonies in the western North Sea. <i>Ibis</i> 151:274-285.           |
| Seabirds      | Temperate | North Sea  | 10      | 1972 | 35 | 0.5  | No | No  | Wanless, S., M. Frederiksen, J. Walton and M.P. Harris. 2009. Long-term changes in breeding phenology at two seabird colonies in the western North Sea. <i>Ibis</i> 151:274-285.           |
| Seabirds      | Temperate | North Sea  | 10      | 1971 | 36 | 1.0  | No | No  | Wanless, S., M. Frederiksen, J. Walton and M.P. Harris. 2009. Long-term changes in                                                                                                         |

|          |             |                     |    |      |    |     |     |     |                                                                                                                                                                                                                         |
|----------|-------------|---------------------|----|------|----|-----|-----|-----|-------------------------------------------------------------------------------------------------------------------------------------------------------------------------------------------------------------------------|
|          |             |                     |    |      |    |     |     |     | breeding phenology at two seabird colonies in the western North Sea. <i>Ibis</i> 151:274-285.                                                                                                                           |
| Seabirds | Polar       | Southern Ocean      | 10 | 1959 | 46 | 1.0 | No  | Yes | Barbraud, C. and H. Weimerskirch. 2006. Antarctic birds breed later in response to climate change. <i>Proceedings of the National Academy of Sciences</i> 103: 6248-6251.                                               |
| Seabirds | Temperate   | North Sea           | 10 | 1971 | 36 | 1.1 | No  | No  | Wanless, S., M. Frederiksen, J. Walton and M.P. Harris. 2009. Long-term changes in breeding phenology at two seabird colonies in the western North Sea. <i>Ibis</i> 151:274-285.                                        |
| Seabirds | Temperate   | North Sea           | 10 | 1974 | 33 | 2.5 | No  | No  | Wanless, S., M. Frederiksen, J. Walton and M.P. Harris. 2009. Long-term changes in breeding phenology at two seabird colonies in the western North Sea. <i>Ibis</i> 151:274-285.                                        |
| Seabirds | Temperate   | North-east Atlantic | 10 | 1982 | 21 | 2.6 | Yes | Yes | Frederiksen, M., M.P. Harris, F. Daunt, P. Rothery, and S. Wanless. 2004. Scale-dependent climate signals drive breeding phenology of three seabird species. <i>Global Change Biology</i> 10: 1214-1221.                |
| Seabirds | Temperate   | North Sea           | 10 | 1982 | 25 | 2.8 | No  | No  | Wanless, S., M. Frederiksen, J. Walton and M.P. Harris. 2009. Long-term changes in breeding phenology at two seabird colonies in the western North Sea. <i>Ibis</i> 151:274-285.                                        |
| Seabirds | Subtropical | North-east Pacific  | 10 | 1988 | 19 | 4.0 | No  | Yes | Schroeder, I.D., W.J. Sydeman, N. Sarkar, S.A. Thompson, S.J. Bograd and F.B. Schwing. 2009. Winter pre-conditioning of seabird phenology in the California Current. <i>Marine Ecology Progress Series</i> 393:211-223. |
| Seabirds | Temperate   | North-east Atlantic | 10 | 1981 | 22 | 5.1 | Yes | Yes | Frederiksen, M., M.P. Harris, F. Daunt, P. Rothery, and S. Wanless. 2004. Scale-dependent climate signals drive breeding phenology of three seabird species. <i>Global Change Biology</i> 10: 1214-1221.                |
| Seabirds | Temperate   | North Sea           | 10 | 1971 | 36 | 6.7 | No  | No  | Wanless, S., M. Frederiksen, J. Walton and M.P. Harris. 2009. Long-term changes in                                                                                                                                      |



|                                                                  |             |                    |    |      |    |       |     |     |                                                                                                                                                                                                                                                                               |
|------------------------------------------------------------------|-------------|--------------------|----|------|----|-------|-----|-----|-------------------------------------------------------------------------------------------------------------------------------------------------------------------------------------------------------------------------------------------------------------------------------|
|                                                                  |             |                    |    |      |    |       |     |     | breeding phenology at two seabird colonies in the western North Sea. <i>Ibis</i> 151:274-285.                                                                                                                                                                                 |
| Seabirds                                                         | Temperate   | North Sea          | 10 | 1981 | 26 | 6.9   | No  | No  | Wanless, S., M. Frederiksen, J. Walton and M.P. Harris. 2009. Long-term changes in breeding phenology at two seabird colonies in the western North Sea. <i>Ibis</i> 151:274-285.                                                                                              |
| Seabirds                                                         | Subtropical | Bass Strait        | 1  | 1968 | 31 | 11.9  | Yes | Yes | Chambers, L.E. 2004. Delayed breeding in Little Penguins-- evidence of climate change? <i>Australian Meteorological Magazine</i> 53: 13-19.                                                                                                                                   |
| SUMMER (NH: June, July, August; SH: December, January, February) |             |                    |    |      |    |       |     |     |                                                                                                                                                                                                                                                                               |
| Seabirds                                                         | Temperate   | North-east Pacific | 10 | 1975 | 25 | -24.0 | No  | No  | Bertram, D.F., D.L. Mackas, and S.M. McKinnell. 2001. The seasonal cycle revisited: interannual variation and ecosystem consequences. <i>Progress in Oceanography</i> 49: 283-307.                                                                                            |
| Zooplankton                                                      | Temperate   | North-west Pacific | 1  | 1968 | 29 | -19.3 | Yes | Yes | Mackas, D.L., R. Goldblatt and A.G. Lewis. 1998. Interdecadal variation in developmental timing of <i>Neocalanus plumchrus</i> populations at Ocean Station P in the subarctic North Pacific. <i>Canadian Journal of Fisheries and Aquatic Sciences</i> 55: 1878-1893         |
| Zooplankton                                                      | Temperate   | North Sea          | 1  | 1974 | 31 | -14.7 | No  | No  | Greve, W, Reiners, F, Nusta, Hoffmann S. 2004. Helgoland Roads meso- and macrozooplankton time-series 1974 to 2004: lessons from 30 years of single spot, high frequency sampling at the only off-shore island of the North Sea. <i>Helgoland Marine Research</i> 58: 274-288 |
| Seabirds                                                         | Temperate   | North-east Pacific | 10 | 1975 | 25 | -9.5  | No  | Yes | Bertram, D.F., D.L. Mackas, and S.M. McKinnell. 2001. The seasonal cycle revisited: interannual variation and ecosystem                                                                                                                                                       |

|               |           |                    |        |      |    |      |     |     |                                                                                                                                                                             |
|---------------|-----------|--------------------|--------|------|----|------|-----|-----|-----------------------------------------------------------------------------------------------------------------------------------------------------------------------------|
|               |           |                    |        |      |    |      |     |     | consequences. Progress in Oceanography 49: 283-307.                                                                                                                         |
| Seabirds      | Temperate | Bering Sea         | 10     | 1975 | 31 | -8.8 | No  | Yes | Byrd, G.V., W.J. Sydeman, H.M. Renner, and S. Minobe. 2008. Responses of piscivorous seabirds at the Pribilof Islands to ocean climate. Deep-Sea Research II 55: 1856-1867. |
| Seabirds      | Temperate | Bering Sea         | 10     | 1975 | 31 | -7.9 | No  | Yes | Byrd, G.V., W.J. Sydeman, H.M. Renner, and S. Minobe. 2008. Responses of piscivorous seabirds at the Pribilof Islands to ocean climate. Deep-Sea Research II 55: 1856-1867. |
| Seabirds      | Temperate | North-east Pacific | 10     | 1975 | 25 | -7.8 | No  | Yes | Bertram, D.F., D.L. Mackas, and S.M. McKinnell. 2001. The seasonal cycle revisited: interannual variation and ecosystem consequences. Progress in Oceanography 49: 283-307. |
| Zooplankton   | Temperate | North Sea          | 100000 | 1958 | 45 | -6.5 | Yes | Yes | Edwards, M. and A.J. Richardson. 2004. Impact of climate change on marine pelagic phenology and trophic mismatch. Nature 430: 881-884.                                      |
| Seabirds      | Temperate | Bering Sea         | 10     | 1975 | 31 | -6.4 | No  | Yes | Byrd, G.V., W.J. Sydeman, H.M. Renner, and S. Minobe. 2008. Responses of piscivorous seabirds at the Pribilof Islands to ocean climate. Deep-Sea Research II 55: 1856-1867. |
| Phytoplankton | Temperate | North Sea          | 100000 | 1958 | 45 | -6.2 | Yes | Yes | Edwards, M. and A.J. Richardson. 2004. Impact of climate change on marine pelagic phenology and trophic mismatch. Nature 430: 881-884.                                      |
| Phytoplankton | Temperate | North Sea          | 100000 | 1958 | 45 | -6.2 | Yes | Yes | Edwards, M. and A.J. Richardson. 2004. Impact of climate change on marine pelagic phenology and trophic mismatch. Nature 430: 881-884.                                      |
| Phytoplankton | Temperate | North Sea          | 100000 | 1958 | 45 | -6.1 | Yes | Yes | Edwards, M. and A.J. Richardson. 2004. Impact of climate change on marine pelagic phenology and trophic mismatch. Nature 430: 881-884.                                      |

|               |           |                    |        |      |    |      |     |     |                                                                                                                                                                             |
|---------------|-----------|--------------------|--------|------|----|------|-----|-----|-----------------------------------------------------------------------------------------------------------------------------------------------------------------------------|
| Phytoplankton | Temperate | North Sea          | 100000 | 1958 | 45 | -5.9 | Yes | Yes | Edwards, M. and A.J. Richardson. 2004. Impact of climate change on marine pelagic phenology and trophic mismatch. Nature 430: 881-884.                                      |
| Phytoplankton | Temperate | North Sea          | 100000 | 1958 | 45 | -5.9 | Yes | Yes | Edwards, M. and A.J. Richardson. 2004. Impact of climate change on marine pelagic phenology and trophic mismatch. Nature 430: 881-884.                                      |
| Seabirds      | Temperate | Bering Sea         | 10     | 1975 | 31 | -5.8 | No  | Yes | Byrd, G.V., W.J. Sydeman, H.M. Renner, and S. Minobe. 2008. Responses of piscivorous seabirds at the Pribilof Islands to ocean climate. Deep-Sea Research II 55: 1856-1867. |
| Zooplankton   | Temperate | North Sea          | 100000 | 1958 | 45 | -5.7 | Yes | Yes | Edwards, M. and A.J. Richardson. 2004. Impact of climate change on marine pelagic phenology and trophic mismatch. Nature 430: 881-884.                                      |
| Seabirds      | Temperate | North-west Pacific | 10     | 1975 | 28 | -5.7 | No  | Yes | Gjerdum, C., et al. 2003. Tufted puffin reproduction reveals ocean climate variability. Proceedings of the National Academy of Science 100: 9377-9382                       |
| Phytoplankton | Temperate | North Sea          | 100000 | 1958 | 45 | -5.4 | Yes | Yes | Edwards, M. and A.J. Richardson. 2004. Impact of climate change on marine pelagic phenology and trophic mismatch. Nature 430: 881-884.                                      |
| Zooplankton   | Temperate | North Sea          | 100000 | 1958 | 45 | -5.1 | Yes | Yes | Edwards, M. and A.J. Richardson. 2004. Impact of climate change on marine pelagic phenology and trophic mismatch. Nature 430: 881-884.                                      |
| Zooplankton   | Temperate | North Sea          | 100000 | 1958 | 45 | -4.9 | Yes | Yes | Edwards, M. and A.J. Richardson. 2004. Impact of climate change on marine pelagic phenology and trophic mismatch. Nature 430: 881-884.                                      |
| Phytoplankton | Temperate | North Sea          | 100000 | 1958 | 45 | -4.9 | Yes | Yes | Edwards, M. and A.J. Richardson. 2004. Impact of climate change on marine pelagic phenology and trophic mismatch. Nature 430: 881-884.                                      |

|               |           |           |        |      |    |      |     |     |                                                                                                                                        |
|---------------|-----------|-----------|--------|------|----|------|-----|-----|----------------------------------------------------------------------------------------------------------------------------------------|
|               |           |           |        |      |    |      |     |     | 881-884.                                                                                                                               |
| Zooplankton   | Temperate | North Sea | 100000 | 1958 | 45 | -4.2 | Yes | Yes | Edwards, M. and A.J. Richardson. 2004. Impact of climate change on marine pelagic phenology and trophic mismatch. Nature 430: 881-884. |
| Phytoplankton | Temperate | North Sea | 100000 | 1958 | 45 | -4.0 | Yes | Yes | Edwards, M. and A.J. Richardson. 2004. Impact of climate change on marine pelagic phenology and trophic mismatch. Nature 430: 881-884. |
| Phytoplankton | Temperate | North Sea | 100000 | 1958 | 45 | -3.7 | Yes | Yes | Edwards, M. and A.J. Richardson. 2004. Impact of climate change on marine pelagic phenology and trophic mismatch. Nature 430: 881-884. |
| Phytoplankton | Temperate | North Sea | 100000 | 1958 | 45 | -3.6 | Yes | Yes | Edwards, M. and A.J. Richardson. 2004. Impact of climate change on marine pelagic phenology and trophic mismatch. Nature 430: 881-884. |
| Zooplankton   | Temperate | North Sea | 100000 | 1958 | 45 | -3.5 | Yes | Yes | Edwards, M. and A.J. Richardson. 2004. Impact of climate change on marine pelagic phenology and trophic mismatch. Nature 430: 881-884. |
| Phytoplankton | Temperate | North Sea | 100000 | 1958 | 45 | -3.2 | Yes | Yes | Edwards, M. and A.J. Richardson. 2004. Impact of climate change on marine pelagic phenology and trophic mismatch. Nature 430: 881-884. |
| Zooplankton   | Temperate | North Sea | 100000 | 1958 | 45 | -3.2 | Yes | Yes | Edwards, M. and A.J. Richardson. 2004. Impact of climate change on marine pelagic phenology and trophic mismatch. Nature 430: 881-884. |
| Zooplankton   | Temperate | North Sea | 100000 | 1958 | 45 | -3.1 | Yes | Yes | Edwards, M. and A.J. Richardson. 2004. Impact of climate change on marine pelagic phenology and trophic mismatch. Nature 430: 881-884. |
| Zooplankton   | Temperate | North Sea | 100000 | 1958 | 45 | -2.8 | Yes | Yes | Edwards, M. and A.J. Richardson. 2004. Impact of climate change on marine pelagic                                                      |

|               |           |           |        |      |    |      |     |     |  |                                                                                                                                                                                          |
|---------------|-----------|-----------|--------|------|----|------|-----|-----|--|------------------------------------------------------------------------------------------------------------------------------------------------------------------------------------------|
|               |           |           |        |      |    |      |     |     |  | phenology and trophic mismatch. Nature 430: 881-884.                                                                                                                                     |
| Zooplankton   | Temperate | North Sea | 100000 | 1958 | 45 | -2.8 | Yes | Yes |  | Edwards, M. and A.J. Richardson. 2004. Impact of climate change on marine pelagic phenology and trophic mismatch. Nature 430: 881-884.                                                   |
| Zooplankton   | Temperate | North Sea | 100000 | 1958 | 45 | -2.7 | Yes | Yes |  | Edwards, M. and A.J. Richardson. 2004. Impact of climate change on marine pelagic phenology and trophic mismatch. Nature 430: 881-884.                                                   |
| Zooplankton   | Temperate | North Sea | 100000 | 1958 | 45 | -2.7 | Yes | Yes |  | Edwards, M. and A.J. Richardson. 2004. Impact of climate change on marine pelagic phenology and trophic mismatch. Nature 430: 881-884.                                                   |
| Seabirds      | Temperate | North Sea | 10000  | 1929 | 70 | -2.6 | No  | Yes |  | Moller, A.P., E. Flensted-Jensen and W. Mardel. 2006. Rapidly advancing laying date in a seabird and the changing advantage of early reproduction. Journal of Animal Ecology 75:657-665. |
| Zooplankton   | Temperate | North Sea | 100000 | 1958 | 45 | -2.6 | Yes | Yes |  | Edwards, M. and A.J. Richardson. 2004. Impact of climate change on marine pelagic phenology and trophic mismatch. Nature 430: 881-884.                                                   |
| Zooplankton   | Temperate | North Sea | 100000 | 1958 | 45 | -2.5 | Yes | Yes |  | Edwards, M. and A.J. Richardson. 2004. Impact of climate change on marine pelagic phenology and trophic mismatch. Nature 430: 881-884.                                                   |
| Phytoplankton | Temperate | North Sea | 100000 | 1958 | 45 | -2.5 | Yes | Yes |  | Edwards, M. and A.J. Richardson. 2004. Impact of climate change on marine pelagic phenology and trophic mismatch. Nature 430: 881-884.                                                   |
| Zooplankton   | Temperate | North Sea | 100000 | 1958 | 45 | -2.3 | Yes | Yes |  | Edwards, M. and A.J. Richardson. 2004. Impact of climate change on marine pelagic phenology and trophic mismatch. Nature 430: 881-884.                                                   |

|               |           |                |        |      |    |      |     |     |                                                                                                                                                                             |
|---------------|-----------|----------------|--------|------|----|------|-----|-----|-----------------------------------------------------------------------------------------------------------------------------------------------------------------------------|
| Zooplankton   | Temperate | North Sea      | 100000 | 1958 | 45 | -2.2 | Yes | Yes | Edwards, M. and A.J. Richardson. 2004. Impact of climate change on marine pelagic phenology and trophic mismatch. Nature 430: 881-884.                                      |
| Phytoplankton | Temperate | North Sea      | 100000 | 1958 | 45 | -1.9 | Yes | Yes | Edwards, M. and A.J. Richardson. 2004. Impact of climate change on marine pelagic phenology and trophic mismatch. Nature 430: 881-884.                                      |
| Zooplankton   | Temperate | North Sea      | 100000 | 1958 | 45 | -1.8 | Yes | Yes | Edwards, M. and A.J. Richardson. 2004. Impact of climate change on marine pelagic phenology and trophic mismatch. Nature 430: 881-884.                                      |
| Zooplankton   | Temperate | North Sea      | 100000 | 1958 | 45 | -1.7 | Yes | Yes | Edwards, M. and A.J. Richardson. 2004. Impact of climate change on marine pelagic phenology and trophic mismatch. Nature 430: 881-884.                                      |
| Zooplankton   | Temperate | North Sea      | 100000 | 1958 | 45 | -1.4 | Yes | Yes | Edwards, M. and A.J. Richardson. 2004. Impact of climate change on marine pelagic phenology and trophic mismatch. Nature 430: 881-884.                                      |
| Seabirds      | Polar     | Greenland Sea  | 100    | 1963 | 46 | -1.0 | No  | Yes | Moe, B., et al. Climate change and phenological responses of two seabird species breeding in the high-Arctic. Marine Ecology Progress Series 393: 235-246.                  |
| Seabirds      | Temperate | Bering Sea     | 10     | 1975 | 31 | 0.0  | No  | Yes | Byrd, G.V., W.J. Sydeman, H.M. Renner, and S. Minobe. 2008. Responses of piscivorous seabirds at the Pribilof Islands to ocean climate. Deep-Sea Research II 55: 1856-1867. |
| Seabirds      | Polar     | Southern Ocean | 10     | 1950 | 55 | 0.2  | No  | Yes | Barbraud, C. and H. Weimerskirch. 2006. Antarctic birds breed later in response to climate change. Proceedings of the National Academy of Sciences 103: 6248-6251.          |
| Seabirds      | Temperate | Bering Sea     | 10     | 1975 | 31 | 1.0  | No  | Yes | Byrd, G.V., W.J. Sydeman, H.M. Renner, and S. Minobe. 2008. Responses of piscivorous seabirds at the Pribilof Islands to ocean                                              |

|                                                                  |           |                     |         |      |    |      |     |     |                                                                                                                                                                                                   |
|------------------------------------------------------------------|-----------|---------------------|---------|------|----|------|-----|-----|---------------------------------------------------------------------------------------------------------------------------------------------------------------------------------------------------|
|                                                                  |           |                     |         |      |    |      |     |     | climate. Deep-Sea Research II 55: 1856-1867.                                                                                                                                                      |
| Seabirds                                                         | Polar     | Greenland Sea       | 100     | 1970 | 39 | 1.3  | No  | Yes | Moe, B., et al. Climate change and phenological responses of two seabird species breeding in the high-Arctic. Marine Ecology Progress Series 393: 235-246.                                        |
| Seabirds                                                         | Temperate | Bering Sea          | 10      | 1975 | 31 | 1.6  | No  | Yes | Byrd, G.V., W.J. Sydeman, H.M. Renner, and S. Minobe. 2008. Responses of piscivorous seabirds at the Pribilof Islands to ocean climate. Deep-Sea Research II 55: 1856-1867.                       |
| Seabirds                                                         | Temperate | North-east Atlantic | 1000000 | 1980 | 28 | 2.1  | Yes | Yes | Wanless, S., M.P. Harris, S. Lewis, M. Frederiksen and S. Murray. 2008. Later breeding in northern gannets in the eastern Atlantic. Marine Ecology Progress Series 370:263-269.                   |
| Seabirds                                                         | Temperate | Bering Sea          | 10      | 1975 | 31 | 4.7  | No  | Yes | Byrd, G.V., W.J. Sydeman, H.M. Renner, and S. Minobe. 2008. Responses of piscivorous seabirds at the Pribilof Islands to ocean climate. Deep-Sea Research II 55: 1856-1867.                       |
| AUTUMN (NH: September, October, November; SH: March, April, May) |           |                     |         |      |    |      |     |     |                                                                                                                                                                                                   |
| Bony fish                                                        | Temperate | North-east Atlantic | 100000  | 1981 | 25 | -0.4 | Yes | Yes | Dufour, F., H. Arrizabalaga, X. Irigoien and J. Santiago. 2010. Climate impacts on albacore and bluefin tunas migrations phenology and spatial distribution. Progress in Oceanography 86: 283-290 |
| Benthic molluscs                                                 | Temperate | North-east Atlantic | 100     | 1946 | 62 | 3.3  | No  | No  | Moore, P.J., R.C. Thompson and S.J. Hawkins. 2010. Phenological changes in intertidal con-specific gastropods in response to climate warming. Global Change Biology 17: 709-719                   |
| Bony fish                                                        | Temperate | North Sea           | 100000  | 1970 | 35 | -8.0 | Yes | Yes | Teal, L.R., J.J. de Leeuw, H.W. van der Veer and A.D. Rijnsdorp. 2008. Effects of climate change on growth of 0-group sole and plaice. Marine Ecology Progress Series 358:219-230                 |

|               |           |                |        |      |    |       |     |     |                                                                                                                                                                                          |
|---------------|-----------|----------------|--------|------|----|-------|-----|-----|------------------------------------------------------------------------------------------------------------------------------------------------------------------------------------------|
| Bony fish     | Temperate | North Sea      | 100000 | 1970 | 35 | -10.0 | Yes | Yes | Teal, L.R., J.J. de Leeuw, H.W. van der Veer and A.D. Rijnsdorp. 2008. Effects of climate change on growth of 0-group sole and plaice. <i>Marine Ecology Progress Series</i> 358:219-230 |
| Seabirds      | Polar     | Southern Ocean | 10     | 1960 | 45 | 1.9   | No  | Yes | Barbraud, C. and H. Weimerskirch. 2006. Antarctic birds breed later in response to climate change. <i>Proceedings of the National Academy of Sciences</i> 103: 6248-6251.                |
| Phytoplankton | Temperate | North Sea      | 100000 | 1958 | 45 | -0.9  | Yes | Yes | Edwards, M. and A.J. Richardson. 2004. Impact of climate change on marine pelagic phenology and trophic mismatch. <i>Nature</i> 430: 881-884.                                            |
| Zooplankton   | Temperate | North Sea      | 100000 | 1958 | 45 | -0.8  | Yes | Yes | Edwards, M. and A.J. Richardson. 2004. Impact of climate change on marine pelagic phenology and trophic mismatch. <i>Nature</i> 430: 881-884.                                            |
| Zooplankton   | Temperate | North Sea      | 100000 | 1958 | 45 | -0.3  | Yes | Yes | Edwards, M. and A.J. Richardson. 2004. Impact of climate change on marine pelagic phenology and trophic mismatch. <i>Nature</i> 430: 881-884.                                            |
| Zooplankton   | Temperate | North Sea      | 100000 | 1958 | 45 | 1.4   | Yes | Yes | Edwards, M. and A.J. Richardson. 2004. Impact of climate change on marine pelagic phenology and trophic mismatch. <i>Nature</i> 430: 881-884.                                            |
| Phytoplankton | Temperate | North Sea      | 100000 | 1958 | 45 | 1.8   | Yes | Yes | Edwards, M. and A.J. Richardson. 2004. Impact of climate change on marine pelagic phenology and trophic mismatch. <i>Nature</i> 430: 881-884.                                            |
| Phytoplankton | Temperate | North Sea      | 100000 | 1958 | 45 | 2.9   | Yes | Yes | Edwards, M. and A.J. Richardson. 2004. Impact of climate change on marine pelagic phenology and trophic mismatch. <i>Nature</i> 430: 881-884.                                            |
| Zooplankton   | Temperate | North Sea      | 100000 | 1958 | 45 | 3.2   | Yes | Yes | Edwards, M. and A.J. Richardson. 2004. Impact of climate change on marine pelagic phenology and trophic mismatch. <i>Nature</i> 430:                                                     |



|                                                                  |           |                     |        |      |    |       |     |     |                                                                                                                                                                                                                       |
|------------------------------------------------------------------|-----------|---------------------|--------|------|----|-------|-----|-----|-----------------------------------------------------------------------------------------------------------------------------------------------------------------------------------------------------------------------|
|                                                                  |           |                     |        |      |    |       |     |     | 881-884.                                                                                                                                                                                                              |
| Zooplankton                                                      | Temperate | North Sea           | 100000 | 1958 | 45 | 5.6   | Yes | Yes | Edwards, M. and A.J. Richardson. 2004. Impact of climate change on marine pelagic phenology and trophic mismatch. Nature 430: 881-884.                                                                                |
| Phytoplankton                                                    | Temperate | North Sea           | 100000 | 1958 | 45 | 6.5   | Yes | Yes | Edwards, M. and A.J. Richardson. 2004. Impact of climate change on marine pelagic phenology and trophic mismatch. Nature 430: 881-884.                                                                                |
| WINTER (NH: December, January, February; SH: June, July, August) |           |                     |        |      |    |       |     |     |                                                                                                                                                                                                                       |
| Zooplankton                                                      | Temperate | North-west Atlantic | 1000   | 1951 | 53 | -11.1 | No  | Yes | Costello, J.H, B.K. Sullivan and D.J. Gifford. 2006. A physical-biological interaction underlying variable phenological responses to climate change by coastal zooplankton. Journal of Plankton Research 28:1099-1105 |
| Seabirds                                                         | Polar     | Southern Ocean      | 10     | 1950 | 55 | 0.4   | No  | Yes | Barbraud, C. and H. Weimerskirch. 2006. Antarctic birds breed later in response to climate change. Proceedings of the National Academy of Sciences 103: 6248-6251.                                                    |
| Seabirds                                                         | Polar     | Southern Ocean      | 10     | 1950 | 55 | 3.9   | No  | Yes | Barbraud, C. and H. Weimerskirch. 2006. Antarctic birds breed later in response to climate change. Proceedings of the National Academy of Sciences 103: 6248-6251.                                                    |
| Seabirds                                                         | Polar     | Southern Ocean      | 10     | 1980 | 25 | 12.6  | No  | Yes | Barbraud, C. and H. Weimerskirch. 2006. Antarctic birds breed later in response to climate change. Proceedings of the National Academy of Sciences 103: 6248-6251.                                                    |
| Seabirds                                                         | Polar     | Southern Ocean      | 10     | 1950 | 55 | 1.0   | No  | Yes | Barbraud, C. and H. Weimerskirch. 2006. Antarctic birds breed later in response to climate change. Proceedings of the National Academy of Sciences 103: 6248-6251.                                                    |
| Seabirds                                                         | Polar     | Southern Ocean      | 10     | 1950 | 55 | 1.9   | No  | Yes | Barbraud, C. and H. Weimerskirch. 2006. Antarctic birds breed later in response to climate change. Proceedings of the National                                                                                        |

|             |           |                |        |      |    |      |     |     |                                                                                                                                                                    |
|-------------|-----------|----------------|--------|------|----|------|-----|-----|--------------------------------------------------------------------------------------------------------------------------------------------------------------------|
|             |           |                |        |      |    |      |     |     | Academy of Sciences 103: 6248-6251.                                                                                                                                |
| Seabirds    | Polar     | Southern Ocean | 10     | 1970 | 35 | -0.6 | No  | Yes | Barbraud, C. and H. Weimerskirch. 2006. Antarctic birds breed later in response to climate change. Proceedings of the National Academy of Sciences 103: 6248-6251. |
| Zooplankton | Temperate | North Sea      | 100000 | 1958 | 45 | 8.4  | Yes | Yes | Edwards, M. and A.J. Richardson. 2004. Impact of climate change on marine pelagic phenology and trophic mismatch. Nature 430: 881-884.                             |
